# Supplementary material for: Genotype-Phenotype Correlation in NF1: Evidence for a More Severe Phenotype Associated with Missense Mutations Affecting NF1 Codons 844–848
Source: PubMed Central journal article supplement — Am J Hum Genet. 2017 Dec 28;102(1):69–87. doi: 10.1016/j.ajhg.2017.12.001 (PMC5777934; doi:10.1016/j.ajhg.2017.12.001), 2017-12-28
Supplement: mmc1.pdf [file mmc1.pdf]

## Supplemental Data

### **Genotype-Phenotype Correlation in NF1: Evidence for a More Severe Phenotype Associated with Missense Mutations Affecting *NF1* Codons 844–848**

Magdalena Koczkowska, Yunjia Chen, Tom Callens, Alicia Gomes, Angela Sharp, Sherrell Johnson, Meng-Chang Hsiao, Zhenbin Chen, Meena Balasubramanian, Christopher P. Barnett, Troy A. Becker, Shay Ben-Shachar, Debora R. Bertola, Jaishri O. Blakeley, Emma M.M. Burkitt-Wright, Alison Callaway, Melissa Crenshaw, Karin S. Cunha, Mitch Cunningham, Maria D. D'Agostino, Karin Dahan, Alessandro De Luca, Anne Destrée, Radhika Dhamija, Marica Eoli, D. Gareth R. Evans, Patricia Galvin-Parton, Jaya K. George-Abraham, Karen W. Gripp, Jose Guevara-Campos, Neil A. Hanchard, Concepcion Hernández-Chico, LaDonna Immken, Sandra Janssens, Kristi J. Jones, Beth A. Keena, Aaina Kochhar, Jan Liebelt, Arelis Martir-Negron, Maurice J. Mahoney, Isabelle Maystadt, Carey McDougall, Meriel McEntagart, Nancy Mendelsohn, David T. Miller, Geert Mortier, Jenny Morton, John Pappas, Scott R. Plotkin, Dinél Pond, Kenneth Rosenbaum, Karol Rubin, Laura Russell, Lane S. Rutledge, Veronica Saletti, Rhonda Schonberg, Allison Schreiber, Meredith Seidel, Elizabeth Siqveland, David W. Stockton, Eva Trevisson, Nicole J. Ullrich, Meena Upadhyaya, Rick van Minkelen, Helene Verhelst, Margaret R. Wallace, Yoon-Sim Yap, Elaine Zackai, Jonathan Zonana, Vickie Zurcher, Kathleen Claes, Yolanda Martin, Bruce R. Korf, Eric Legius, and Ludwine M. Messiaen

MEDICAL GENOMICS LABORATORY: *NF1/SPRED1* PHENOTYPIC CHECKLIST FORM

**UAB**  
 Patient ID: \_\_\_\_\_ Date of Exam: \_\_/\_\_/\_\_\_\_  
 Referring Physician: \_\_\_\_\_

**DEMOGRAPHIC INFORMATION**

Gender:  Male  Female Date of Birth: \_\_/\_\_/\_\_\_\_

Ethnicity: Mother:  White  Black  Native American  Hispanic  Asian  Other:  
 Father:  White  Black  Native American  Hispanic  Asian  Other:

**DIAGNOSIS**

NIH criteria:  >6 CAL spots >5mm, postpubertal >15mm  Otic glioma  
 >2 neurofibromas or 1 plexiform NF  >2 Lisch nodules  
 Axillary or inguinal freckling  A distinct osseous lesion  
 First degree relative diagnosed with NF1 by above criteria  
 Does patient fulfill NIH diagnostic criteria for NF1?  Yes  No

Clinical diagnosis:  NF1  Multiple CAL spots  Familial multiple CAL spots  
 Spinal NF  Isolated neurofibromas  Segmental NF1  
 NF Noonan  Single NF1 feature  Waitsen Syndrome  
 Legius syndrome  Unknown

Family history:  Sporadic (proband is a "founder")  Familial (proband is a "non-founder")  Unknown  
 Consanguinity:  Yes  No  Unknown

**GENERAL INFORMATION**

Height: \_\_\_\_ cm Head circumference: \_\_\_\_ cm Weight: \_\_\_\_ kg

**NF SIGNS AND SYMPTOMS**

1) **CAL spots:**  0  1-5  >6 to 100  >100  
 General impression on the borders of the CAL-spots:  
 typical well-defined smooth borders diameter: \_\_\_\_\_  
 irregular margins, ragged borders  
 for detail on size and location of the CAL-spots and other hyperpigmentation areas: page 3.

2) **Skin fold freckling:**  None  Left  Right  Unknown  
 Comments (e.g. very faint,...): \_\_\_\_\_  
 Groin  Axilla  Submammary

3) **Lisch nodules:**  None  Left  Right  Unknown

4) **Cutaneous neurofibromas (soft nodules that project above the skin):** histopathologically confirmed: Y / N

0  2-6  6-99  100-500  >500

5) **Intradermal neurofibromas (soft depression within the skin w/ pinkish overlying discoloration):** histopathologically confirmed: Y / N

0  2-6  6-99  100-500  >500

6) **Subdermal neurofibromas (firm nodules palpable underneath the skin):** histopathologically confirmed: Y / N

0  2-6  6-99  100-500  >500

MEDICAL GENOMICS LABORATORY: *NF1/SPRED1* PHENOTYPIC CHECKLIST FORM

**UAB**  
 7) **Plexiform neurofibromas:** histopathologically confirmed: Y / N  
 None  visible from outside  with hyperpigmentation  
 internal  without hyperpigmentation

Head  Neck  Trunk  L Arm  L Hand  L Leg  L Foot  
 Abdomen  Pelvis  Genital area  R Arm  R Hand  R Leg  R Foot

8) **Spinal neurofibromas (neurofibromas arising from the spinal nerve root):** histopathologically confirmed: Y / N

Unknown  Absent by MRI  Present, asymptomatic  
 Present, symptomatic

If present, please provide detail on figure page 4  
 unilateral or  bilateral;  
 C: \_\_\_\_ T: \_\_\_\_ L: \_\_\_\_ S: \_\_\_\_ regions.

9) **Optic glioma:**  Unknown  Absent by MRI  Present by MRI, asymptomatic

Present by MRI, symptomatic  
 Nerve (L and/or R)  
 Chiasm  
 Present by MRI, asymptomatic  
 Nerve (L and/or R)  
 Chiasm

10) **Other neoplasms:**  None  Brainstem glioma  Other glioma

Hypothalamic glioma  JMLL  Rhabdomyosarcoma  
 MPNST  Juvenile xanthogranuloma  Colonic polyps  Lipoma  
 Pheochromocytoma  schwannoma  Other, specify: \_\_\_\_\_  
 pectus excavatum  pectus carinatum

11) **Skeletal Abnormalities:**  None  Long bone dysplasia  Pseudoarthrosis  Sphenoid wing dysplasia  
 Bone cysts  scoliosis  Dysplastic vertebrae  
 pectus excavatum  pectus carinatum  Other: \_\_\_\_\_

12) **Cardiovascular disease:**  Absent  Unknown  Present:  
 Hypertension  Pulmonic stenosis  Aortic stenosis  
 Renal artery stenosis  Moyas moyas  ASD  
 VSD  Other: \_\_\_\_\_

13) **Development:**  Normal  Exam not done  
 Abnormal  ADD  Hyperactivity  Learning disability  
 speech delay  autism  pervasive developmental delay  
 IQ: Full scale: \_\_\_\_\_ Verbal: \_\_\_\_\_ Performance: \_\_\_\_\_

14) **Education:**  Too young for school  At or above age level  Below age level  Unknown  
 HS completion  College graduate  Higher degree

MEDICAL GENOMICS LABORATORY: *NF1/SPRED1* PHENOTYPIC CHECKLIST FORM

**UAB**  
 15) **Noonan phenotype:**  Absent  Possible  Unknown  
 Present:  Short stature  Low set ears  Pulmonic Stenosis  
 Hypertelorism  Webbed neck  peak jet velocity \_\_\_\_ m/s  
 Midface hypoplasia  peak gradient \_\_\_\_ mmHg across pulmonic valve  
 PTPN11 testing done? Result: \_\_\_\_\_

16) **Segmental NF phenotype:**  Absent  Possible  
 location/size of pigmentary lesions and/or neurofibromas

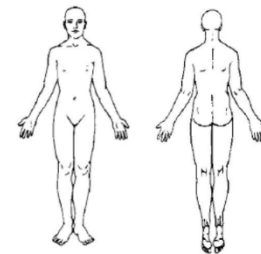

Indicate size and location of  
 Neurofibromas   
 CAL-spots   
 Freckling   
 Hyperpigmented region

17) **Location of spinal tumors (if present)**

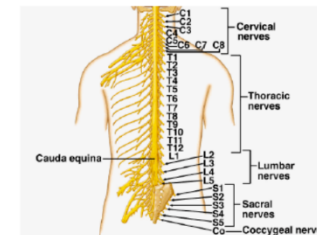

18) **any other comments/remarks:**

Figure S1. Standardized phenotypic checklist used to document the phenotype of the individuals included in this study.

# HGMD

# ClinVar

# LOVD

# UAB

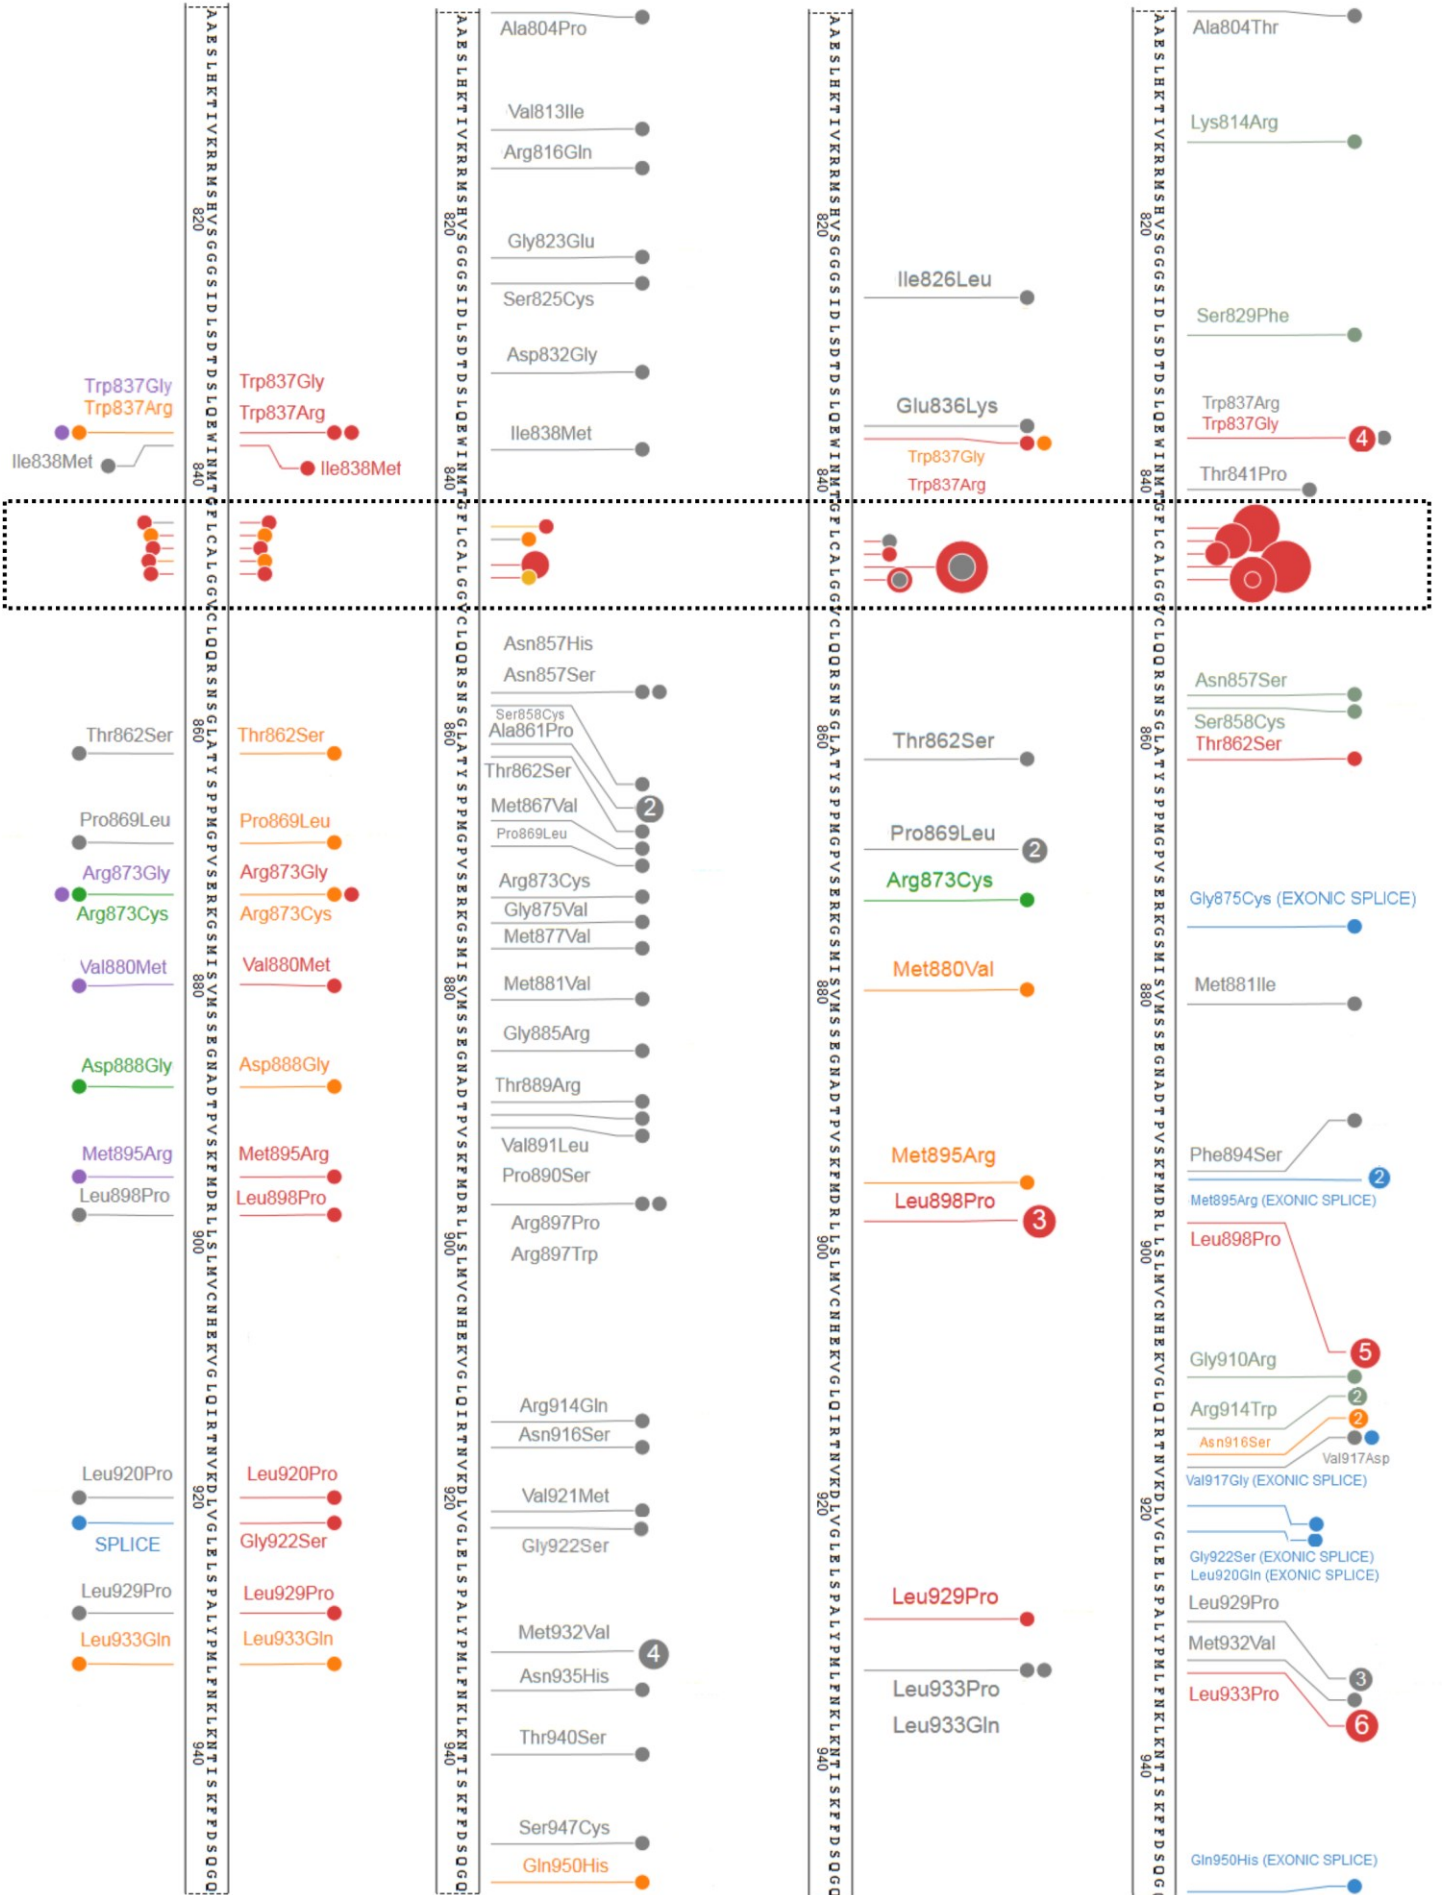

**Figure S2.** The spectrum of missense mutations in the exon 21 [16] of *NF1* (codons 804-950): a comparison of variants deposited in the publicly available disease databases (LOVD, ClinVar and HGMD, as of 05/09/2017) and variants identified in ~8400 unrelated individuals from UAB cohort.

All individuals identified in UAB cohort had been analyzed using comprehensive *NF1* mutation analysis using a core RNA-based approach and MLPA as previously described.<sup>1,2</sup> The variants reported in UAB cohort were classified according to the ACMG recommendations.<sup>3</sup> The classifications of the variants deposited in the publicly available databases (LOVD, ClinVar and HGMD) are shown here as reported by the original author(s). Additionally, the evidence provided in the original publications for those variants deposited in the HGMD database were reviewed and re-classified, if needed, based on currently accepted criteria for pathogenicity.<sup>3</sup>

#### **HGMD re-verification:**

**c.2514C>G (p.Ile838Met)** - reported in 1/91 unrelated *NF1* individuals fulfilling the NIH diagnostic criteria, also carrying the second *NF1* variant c.2531T>C (p.Leu844Pro); no phenotypic details available; no evidence for pathogenicity provided (Mattocks et al.<sup>4</sup>); **c.2509T>C (p.Trp837Arg)**, **c.2585C>G (p.Thr862Ser)**, **c.2606C>T (p.Pro869Leu)**, **c.2798T>A (p.Leu933Gln)** - absence in normal controls, segregation studies, proven *de novo* with paternity confirmation, *in silico* analysis (van Minkelen et al.<sup>5</sup>); **c.2509T>G (p.Trp837Gly)**, **c.2617C>G (p.Arg873Gly)**, **c.2638G>A (p.Val880Met)**, **c.2684T>G (p.Met895Arg)** - no evidence for pathogenicity provided by the original author(s) (Sabbagh et al.<sup>6</sup> and Pasmant et al.<sup>7</sup>); **c.2693T>C (p.Leu898Pro)** - reported once in sporadic case of 465 unrelated *NF1* individuals; no phenotypic details available; no evidence for pathogenicity provided (Maynard et al.<sup>8</sup>); **c.2759T>C (p.Leu920Pro)** - reported once in sporadic case of 17 unrelated *NF1* individuals; 2 CALMs and spinal neurofibromas; no evidence for pathogenicity provided (Kluwe et al.<sup>9</sup>); **c.2617C>T (p.Arg873Cys)**, **c.2663A>G (p.Asp888Gly)** - both variants reported in the same Sicilian individual; the same person also carrying two *NF1* frameshift alterations: c.2480delA, c.2632delC and other missense and synonymous variants (Bongiorno et al.<sup>10</sup>); **c.2764G>A (p.Gly922Ser)** - RNA-based approach analysis demonstrated that variant p.Gly922Ser results in cryptic 5' splice site/ 2761del90 (Ars et al.<sup>11</sup>); **c.2786T>C (p.Leu929Pro)** - reported once, absent in >1000 normal chromosomes, no further evidence for pathogenicity provided (Ribeiro et al.<sup>12</sup>).

Each number in the circle corresponds with the total number of probands with a specific variant. The dotted black line indicates the region studied in this report (codons 844-848). For graph presenting the variants deposited in the HGMD database, right panel shows the variants' classifications originally reported by the author(s), while left panel indicates the classifications based on our re-verification and following the ACMG recommendations.<sup>3</sup> Different colors correspond with the pathogenicity score according to the legend presented below ("exonic splice variants" are not *true* missense mutations; these variants cause missplicing as observed by RNA-based analysis in blood). The phenotypes of individuals from UAB cohort carrying a particular alteration are presented below in the table. The figure was prepared using the ProteinPaint application.<sup>13</sup>

-  Pathogenic
-  Likely pathogenic
-  Variant of uncertain significance
-  Likely benign
-  Benign
  
-  Clinical significance not reported
-  Lack of evidence for pathogenicity
-  Exonic splice variants

| Variant                                     | Phenotype                                                                                                                                                                                                                                                                                              | Classification           |
|---------------------------------------------|--------------------------------------------------------------------------------------------------------------------------------------------------------------------------------------------------------------------------------------------------------------------------------------------------------|--------------------------|
| <b>c.2410G&gt;A</b><br><b>(p.Ala804Thr)</b> | 30-yo Japanese individual with >5 CALMs, freckling, 6-99 cutaneous and 6-99 intradermal nf                                                                                                                                                                                                             | <b>VUS</b>               |
| <b>c.2441A&gt;G</b><br><b>(p.Lys814Arg)</b> | 6-yo Asian individual with >5 CALMs and freckling, also carrying <i>NF1</i> c.1338delA (p.Leu447Phefs*26); p.Lys814Arg ALSO present in the unaffected mother                                                                                                                                           | <b>Likely benign</b>     |
| <b>c.2486C&gt;T</b><br><b>(p.Ser829Phe)</b> | 16-yo Native American proband with right axillary freckling, abdominal internal nf, also carrying <i>NF1</i> c.2894T>G (p.Ile965Arg); p.Ser829Phe ALSO present in the unaffected mother, whereas p.Ile965Arg was <i>de novo</i>                                                                        | <b>Likely benign</b>     |
| <b>c.2509T&gt;C</b><br><b>(p.Trp837Arg)</b> | 24-yo individual with >5 CALMs and freckling                                                                                                                                                                                                                                                           | <b>VUS</b>               |
| <b>c.2509T&gt;G</b><br><b>(p.Trp837Gly)</b> | >5 CALMs and freckling (all individuals, from 3-yo to 20-yo); other complications: abnormal development and asymptomatic OPG (3-yo) and plexiform nf (20-yo)                                                                                                                                           | <b>Pathogenic</b>        |
| <b>c.2521A&gt;C</b><br><b>(p.Thr841Pro)</b> | >5 CALMs and freckling (3-yo); <i>de novo</i> but no identity test done                                                                                                                                                                                                                                | <b>VUS</b>               |
| <b>c.2570A&gt;G</b><br><b>(p.Asn857Ser)</b> | 2.5-yo individual with >5 CALMs; p.Asn857Ser ALSO present in the unaffected mother                                                                                                                                                                                                                     | <b>Likely benign</b>     |
| <b>c.2573C&gt;G</b><br><b>(p.Ser858Cys)</b> | >5 CALMs and freckling, 2-6 cutaneous and 2-6 intradermal nf, long bone dysplasia (31-yo); presence of second nonsense variant c.4108C>T (p.Gln1370*)                                                                                                                                                  | <b>Likely benign</b>     |
| <b>c.2585C&gt;G</b><br><b>(p.Thr862Ser)</b> | 5-yo proband with 1-5 CALMs and pre B-cell acute lymphoblastic leukemia; p.Thr862Ser ALSO present in affected 33-yo mother with 4-5 CALMs, bilateral Lisch nodules and plexiform nf on the leg                                                                                                         | <b>Pathogenic</b>        |
| <b>c.2643G&gt;A</b><br><b>(p.Met881Ile)</b> | 2-yo proband with 1-5 CALMs and freckling; variant ALSO found in 32-yo father with 3 CALMs                                                                                                                                                                                                             | <b>VUS</b>               |
| <b>c.2681T&gt;C</b><br><b>(p.Phe894Ser)</b> | 10-yo proband with >5 CALMs and freckling; variant ALSO found in 12-yo sibling with >5 CALMs and freckling                                                                                                                                                                                             | <b>VUS</b>               |
| <b>c.2693T&gt;C</b><br><b>(p.Leu898Pro)</b> | >5 CALMs and freckling (all individuals, from 1-yo to 38-yo); 2 individuals >26-yo have numerous cutaneous and subcutaneous nf and plexiform nf; proven <i>de novo</i> but no identity test done; p.Leu898Pro ALSO found in father and son of the one individual (son with OPG)                        | <b>Pathogenic</b>        |
| <b>c.2728G&gt;C</b><br><b>(p.Gly910Arg)</b> | only 3-4 CALMs and abnormal development; the presence of second missense variant c.3632T>G (p.Leu1211Arg); familial history, but ONLY variant p.Leu1211Arg was identified in the individual's father and paternal grandfather with the NF1 features; p.Gly910Arg ALSO present in the unaffected mother | <b>Likely benign</b>     |
| <b>c.2740C&gt;T</b><br><b>(p.Arg914Trp)</b> | both individuals with >5 CALMs; individual with abnormal development and pulmonic stenosis has the presence of the second variant ( <i>NF1</i> deletion exons 2-3)                                                                                                                                     | <b>Likely benign</b>     |
| <b>c.2747A&gt;G</b><br><b>(p.Asn916Ser)</b> | 10-mo individual with 1-5 CALMs, brainstem glioma and pectus excavatum (sporadic); 12-yo individual only with >5 CALMs and variant ALSO present in the individual's father with <6 CALMs and in 5-yo brother with >5 CALMs and freckling                                                               | <b>Likely pathogenic</b> |
| <b>c.2750T&gt;A</b><br><b>(p.Val917Asp)</b> | only >5 CALMs; the individual's mother has the NF1 features, but she had not been tested                                                                                                                                                                                                               | <b>VUS</b>               |
| <b>c.2786T&gt;C</b><br><b>(p.Leu929Pro)</b> | 7-mo individual with >6 CALMs and freckles, proven <i>de novo</i> ; for other individuals no data provided                                                                                                                                                                                             | <b>VUS</b>               |
| <b>c.2794A&gt;G</b><br><b>(p.Met932Val)</b> | 4-mo Asian individual with only >5 CALMs                                                                                                                                                                                                                                                               | <b>VUS</b>               |
| <b>c.2798T&gt;C</b><br><b>(p.Leu933Pro)</b> | >5 CALMs and freckles; Lisch nodules (in 2/6 individuals), cutaneous (2/6) and intradermal (2/6) nf, plexiform (1/6) and spinal (1/6) nf, abnormal development (3/6); others: juvenile pilocytic astrocytoma, brainstem hamartoma and pseudarthrosis                                                   | <b>Pathogenic</b>        |

yo - years old; mo - months old; nf - neurofibromas; OPG - optic pathway glioma; VUS - variant of uncertain significance

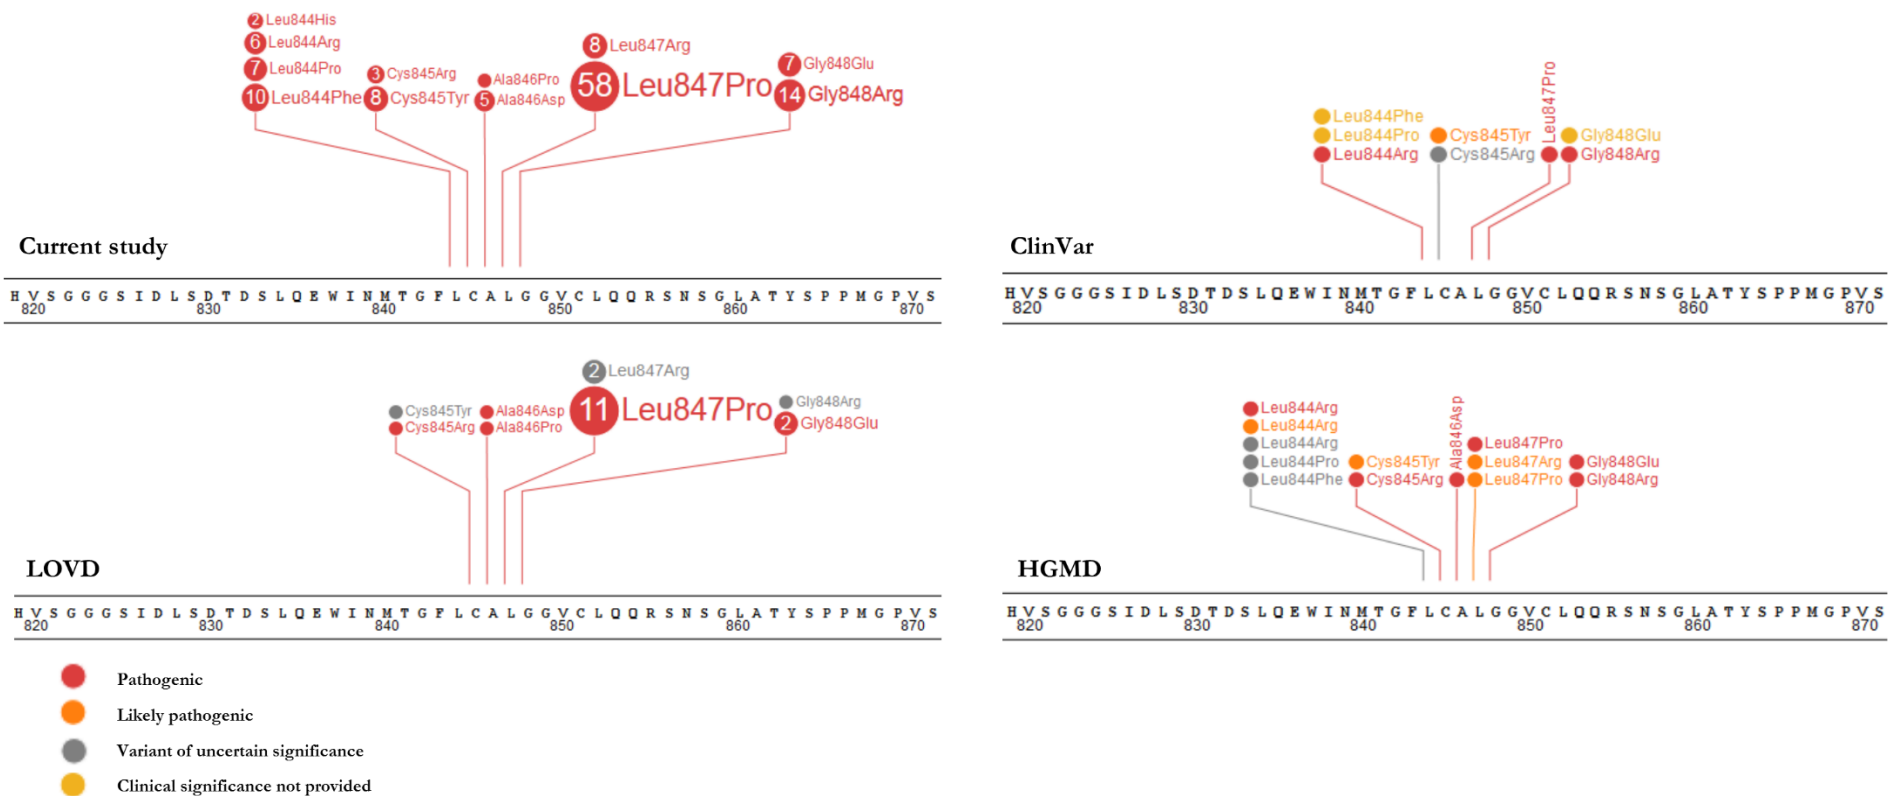

**Figure S3.** The classification of *NFI* missense mutations affecting codons 844-848: a comparison of the classification in the publicly available disease databases (LOVD, ClinVar and HGMD, as of 05/09/2017) with the current study, classifying variants according to the ACMG recommendations (details in Tables S2-S4).

The classifications of the variants deposited in the publicly available LOVD and ClinVar databases are shown here as reported by the original author(s). For variants deposited in the HGMD database, the originally reported variants' classifications were reviewed and if necessary re-classified according to the ACMG guidelines<sup>3</sup> based on the evidence for pathogenicity provided in the published papers by the authors (details in Table S3). Each number in the circle corresponds with the total number of probands with a specific variant. Different colors correspond with the pathogenicity score. The figure was prepared using the ProteinPaint application.<sup>13</sup>



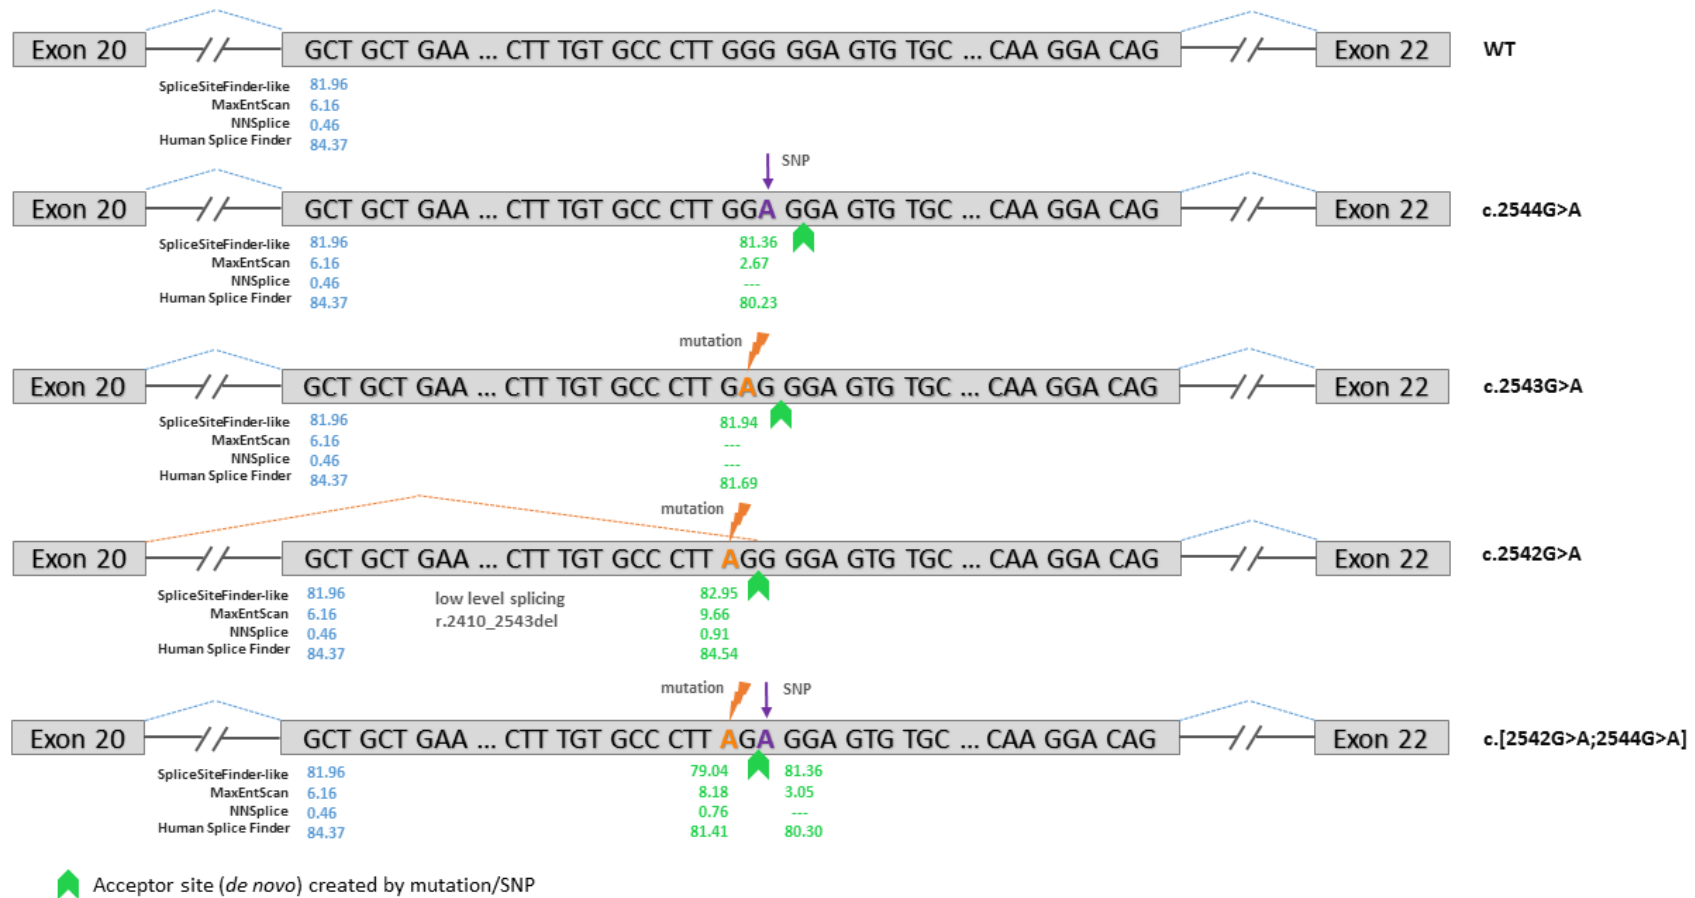

**Figure S4.** *In silico* prediction and *in vivo* analysis of the effect of the *NF1* c.2542G>A (p.Gly848Arg) and c.2543G>A (p.Gly848Glu) missense mutations as well as the single nucleotide polymorphism c.2544G>A (p.Gly848=) on splicing in short-term cultured blood lymphocytes.

Based on the results of *in silico* analysis (SpliceSiteFinder-like, MaxEntScan, NNSplice and Human Splice Finder embedded in Alamut visual software v.2.9.0), a novel splice acceptor site is created by the presence of *NF1* mutations (c.2542G>A and c.2543G>A) as well as by the single nucleotide polymorphism (SNP) at c.2544G>A (rs17883704). *In vivo* transcript analysis and sequencing revealed a minor effect on splicing ONLY for c.2542G>A, resulting in low level of r.2410\_2543del transcript. No missplicing effect was observed in individuals carrying the *NF1* mutation c.2542G>A and SNP; both variants proven to reside in cis through next-generation sequencing.

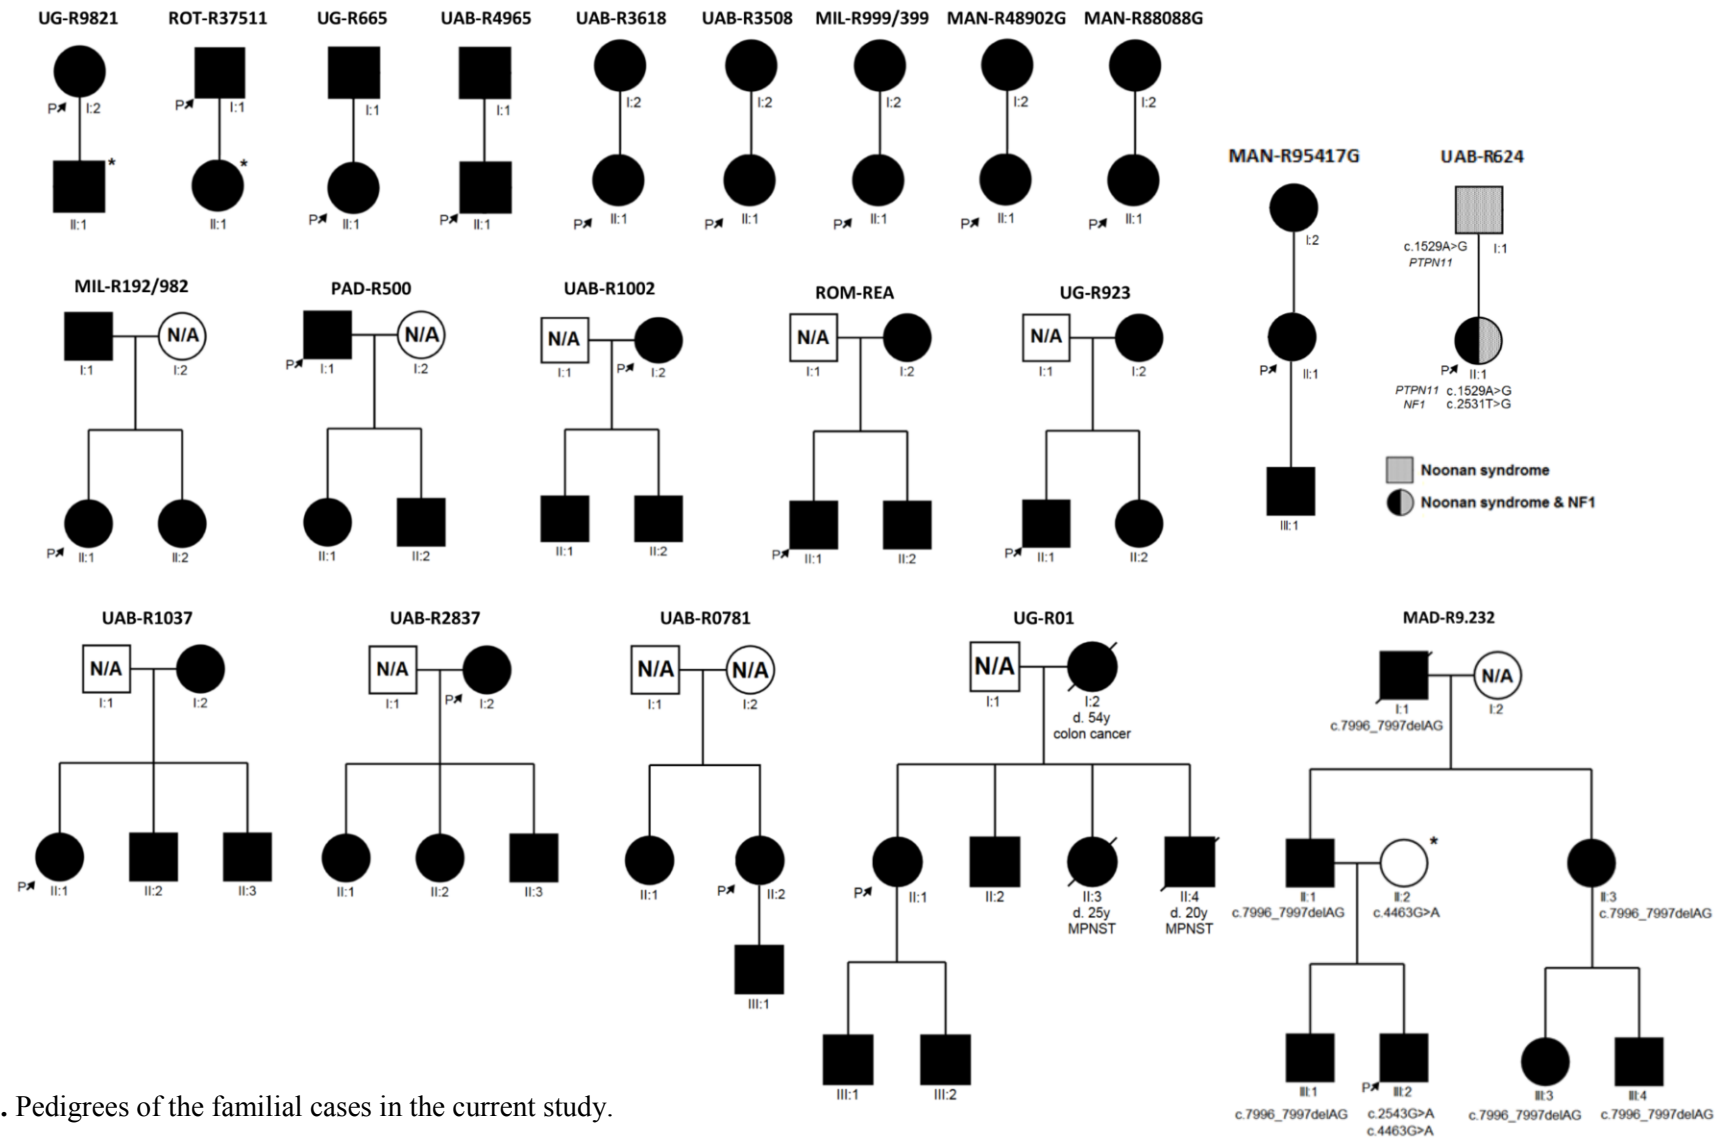

**Figure S5.** Pedigrees of the familial cases in the current study.

The filled black symbols represent the individuals who are positive for an *NF1* missense mutation affecting codons 844-848, while the open symbols represent relatives who are negative for the family specific mutations. The arrow indicates the proband of the family. For the first generation, father is always I:1 and mother is I:2.

**Abbreviations:** N/A - the relatives not available for genetic analysis; \* - no clinical information available for these individuals.



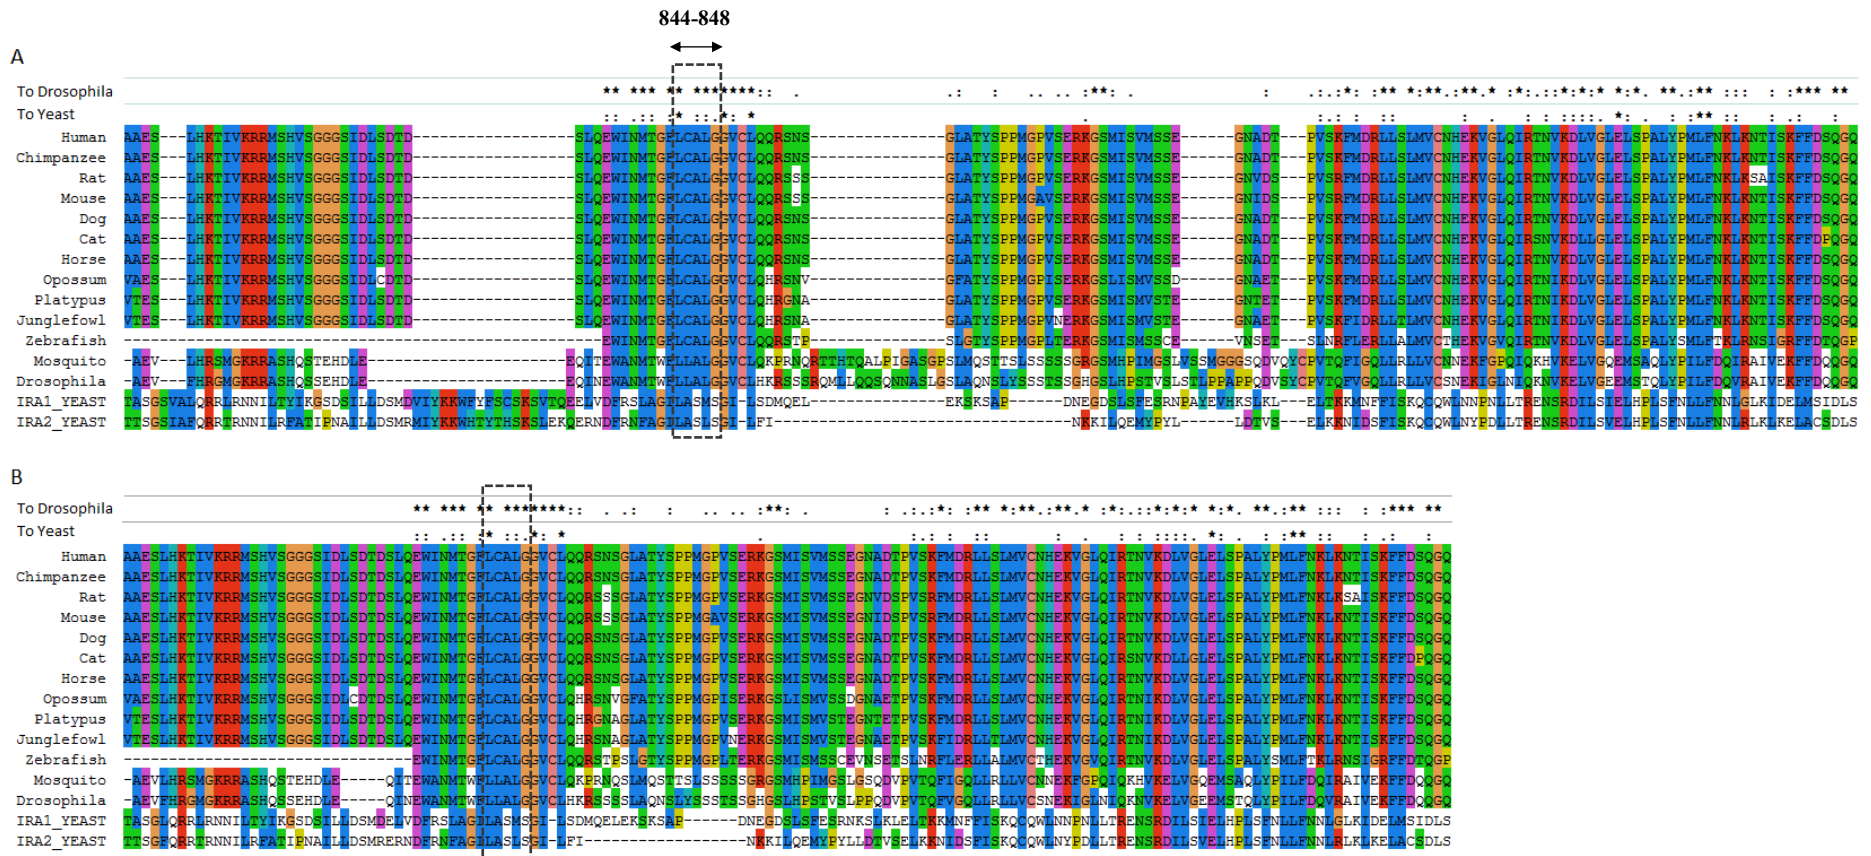

**Figure S6.** Multiple sequence alignment of the exon 21 [16] of *NFI* (A) and multiple sequence alignment of the same region adjusted to the human *NFI* without gaps (B).

Human (RefSeq: NP\_000258.1 residues 804-950), Chimpanzee (TrEMBL: K7DMZ3 residues 804-950), Rat (SWISSPROT: P97526 residues 806-952), Mouse (SWISSPROT: Q04690-2 residues 806-952), Dog (RefSeq: XP\_013971967.1 residues 799-945), Cat (RefSeq: XP\_011287367.1 residues 807-953), Horse (TrEMBL: F6XRM7 residues 739-885), Opossum (TrEMBL: F6ZHU9 residues 564-710), Platypus (RefSeq: XP\_007664859.1 residues 840-986), Junglefowl (RefSeq: XP\_003642464.1 residues 799-945), Zebrafish (TrEMBL: E7FBD0 residues 751-865), Mosquito (TrEMBL: B0WYP5 residues 771-936), Drosophila (TrEMBL: O01397 residues 804-969), yeast IRA1 (SWISSPROT: IRA1\_YEAST residues 1253-1419) and IRA2 (SWISSPROT: IRA2\_YEAST residues 1263-1411) were included in the alignment. The multiple sequence alignment was performed using *Clustal 2.0.12* software with manually adjustment. The black dotted lines on the panels present the region 844-848. An asterisk (\*), a colon (:), and a period (.) indicate the following positions: (\*) a single fully conserved residue, (:) conservation between groups of strongly similar properties and (.) conservation between groups of weakly similar properties.

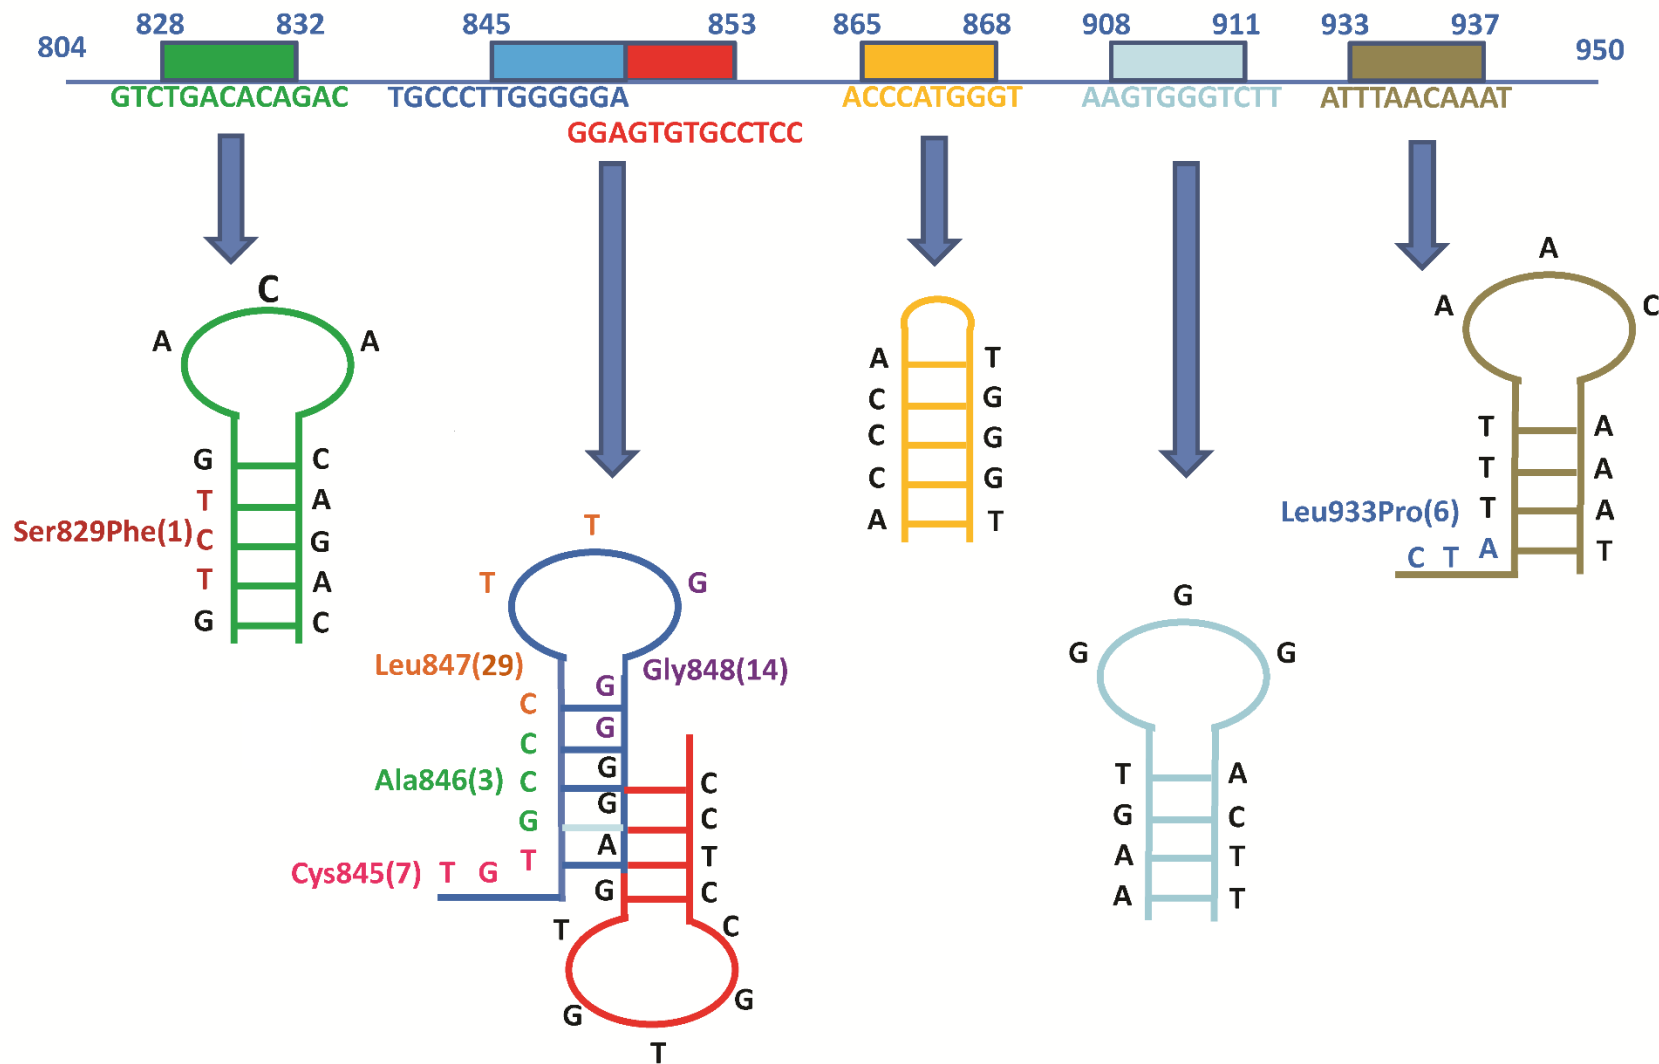

**Figure S7.** Schematic of five palindromic structures in the *NF1* codons 804-950.

Missense mutations with a total number of samples identified in the UAB cohort were annotated next to the palindromic structures with each color corresponding to the variant motif. Particularly, two palindromic sequences TGCCCTTGGGGGA (AA845-849) and GGAGTGTGCCTCC (AA849-853) may form a unique non-B DNA structure contributing recurrent missense mutations.

**Table S1.** Clinical details for 162 individuals with an *NF1* missense mutation affecting one of five codons 844-848 from 129 different families.

Table S1 is included as a separate Excel file.

<sup>A</sup> For individuals with one asterisk (\*) the standardized phenotypic checklist forms were not updated by the referring physicians, the data are based on the originally submitted forms; individuals with two asterisks (\*\*) had incomplete phenotypic checklist forms; individuals with three asterisks (\*\*\*) were the newborn infants without the NF1 features at birth or without the clinical data provided.

<sup>B</sup> **UAB:** University of **A**labama at **B**irmingham (67 probands and 11 relatives); **BRA:** Fluminense Federal University, Niterói, **B**razil (one proband); **CAR:** i/ Division of Cancer and Genetics, Cardiff University, **C**ardiff, UK; ii/ Birmingham Women's and Children's NHS Foundation Trust, Birmingham, UK; iii/ Wessex Regional Genetics Laboratory, Salisbury NHS Foundation Trust, Salisbury, UK; iv/ St George's University Hospitals NHS Foundation Trust, London, UK; v/ Division of Medical Oncology, National Cancer Centre, Singapore (5 probands); **MAD:** Hospital Universitario Ramón y Cajal, Institute of Health Research (IRYCIS) and Center for Biomedical Research-Network for Rare Diseases (CIBERER), **M**adrid, Spain (6 probands); **MAN:** University of **M**anchester, UK (4 probands and 4 relatives); **MIL:** Carlo Besta Neurological Institute, **M**ilan, Italy (6 probands and 3 relatives); **PAD:** University of **P**adova, Italy (5 probands and 2 relatives); **SGR:** Molecular Genetics Unit, Casa Sollievo della Sofferenza Hospital, IRCCS, **S**an **G**iovanni **R**otondo, Italy (4 probands and 2 relatives); **ROT:** Erasmus Medical Center, **R**otterdam, the Netherlands (13 probands); **SHE:** Sheffield Children's NHS Foundation Trust, **S**heffield, UK (one proband); **UL:** University of **L**euvén, Leuven, Belgium (one proband); **UF:** University of **F**lorida College of Medicine, Gainesville, Florida, USA (one proband); **UG:** University Hospital, **G**hent, Belgium (15 probands and 11 relatives).

<sup>C</sup> **F:** familial; **PrS:** proven sporadic; **RS:** reportedly sporadic; **NS:** not specified

<sup>D</sup> Exact age was used to calculate Height and Head Circumferences, but provided as age-groups in Table S1: 0-24 months; 2-4 years; 5-8 years; 9-13 years; 14-18 years; 19-26 years; >26 years.

<sup>E</sup> **F:** female; **M:** male

<sup>F</sup> **W:** White; **His:** Hispanic; **AA:** Affrican American; **As:** Asian; **NaA:** Native American; **Pa:** Pakistani; **Fil:** Filipino; **A:** Affrican; **Jew:** Jewish

<sup>G</sup> An individual was classified as having „NF-Noonan” if at least two of the following features were present: short stature (SS), low set ears (LSE), hypertelorism (HTL), midface hypoplasia (MH), webbed neck (WN) or pulmonic stenosis (PS).

<sup>H</sup> Height percentiles for Hispanic and Asian individuals were provided in square brackets to indicate that they were excluded from the data analysis on frequency of short or normal stature due to the lack of ethnic-specific growth charts.

<sup>I</sup> Individuals with ADD/ADHD, but normal development were still classified as normal.

#### **Abbreviations:**

**NS:** not specified; **bil:** bilateral; **gr:** groin; **ax:** axillary; **OPG:** optic pathway glioma; **N, UN:** no symptomatic OPG or symptomatic spinal neurofibroma, unknown if any asymptomatic OPG or asymptomatic spinal neurofibromas are present; **N, MRI:** no symptomatic and asymptomatic OPG or spinal neurofibroma detected by **MRI**; **Y, MRI:** yes, presence of OPG or spinal neurofibroma confirmed by **MRI**; **ASD:** atrial septal defect; **LD:** learning disability; **HTL:** hypertelorism; **MH:** midface hypoplasia; **SS:** short stature; **PT:** ptosis; **PS:** pulmonic stenosis; **DPF:** downslanting palpebral fissures; **LSE:** low set ears; **ADD:** attention deficit disorder; **ADHD:** attention deficit hyperactivity disorder; **SD:** speech delay; **F:** father; **M:** mother; **S:** sibling; **C:** child.

**Table S2.** *In silico* prediction of pathogenicity and *in vivo* splicing analysis of *NFI* missense mutations affecting codons 844-848 in the studied group.

| Variant   | Protein     | 844-848 positive probands | 844-848 positive UAB probands | gnomAD (123,136) | EVS (6,503) | 1000 G | HGMD <sup>A</sup> | LOVD <sup>A</sup> (3,384) | ClinVar <sup>A</sup> | Grantham distance | SIFT                | PolyPhen                  | CADD | SSF/ MaxEntScan/ NNSplice/HSF                                                                                                                                    | RNA observed                | Other evidence <sup>B</sup>                                                                                                                                                             |
|-----------|-------------|---------------------------|-------------------------------|------------------|-------------|--------|-------------------|---------------------------|----------------------|-------------------|---------------------|---------------------------|------|------------------------------------------------------------------------------------------------------------------------------------------------------------------|-----------------------------|-----------------------------------------------------------------------------------------------------------------------------------------------------------------------------------------|
| c.2530C>T | p.Leu844Phe | 10/129                    | 5/67                          | 0                | 0           | 0      | Present (DM)      | 0                         | Present (NP)         | 22                | Deleterious (0)     | Probably damaging (0.997) | 27.2 | No change                                                                                                                                                        | Normal                      | Proven <i>de novo</i> (UAB-R2425; UAB-R8475; UAB-R0903); segregation in family (MAN-R48902G)                                                                                            |
| c.2531T>A | p.Leu844His | 2/129                     | 1/67                          | 0                | 0           | 0      | 0                 | 0                         | 0                    | 99                | Deleterious (0)     | Probably damaging (0.999) | 26.6 | No change                                                                                                                                                        | Normal                      | Proven <i>de novo</i> (UAB-R4444)                                                                                                                                                       |
| c.2531T>C | p.Leu844Pro | 7/129                     | 5/67                          | 0                | 0           | 0      | Present (DM)      | 0                         | Present (NP)         | 98                | Deleterious (0)     | Probably damaging (0.997) | 25.9 | No change                                                                                                                                                        | Normal                      | Proven <i>de novo</i> (UAB-R3714; UAB-R2087; UAB-R8047; UAB-R0075)                                                                                                                      |
| c.2531T>G | p.Leu844Arg | 6/129                     | 3/67                          | 0.00041%         | 0           | 0      | Present (DM)      | 0                         | Present (P)          | 102               | Deleterious (0)     | Probably damaging (0.997) | 26.8 | No change                                                                                                                                                        | Normal                      | Proven <i>de novo</i> (UAB-R624)                                                                                                                                                        |
| c.2533T>C | p.Cys845Arg | 3/129                     | 1/67                          | 0                | 0           | 0      | Present (DM)      | 1 (P)                     | Present (VUS)        | 180               | Deleterious (0.010) | Possibly damaging (0.571) | 22.6 | No change                                                                                                                                                        | Normal                      | Proven <i>de novo</i> (UAB-R3112); segregation in family (MAN-R88088G)                                                                                                                  |
| c.2534G>A | p.Cys845Tyr | 8/129                     | 6/67                          | 0                | 0           | 0      | Present (DM?)     | 1 (VUS)                   | Present (LP)         | 194               | Deleterious (0.01)  | Possibly damaging (0.891) | 23.2 | No change                                                                                                                                                        | Normal                      | Proven <i>de novo</i> (UAB-R9135; UAB-R7836; UAB-R2696)                                                                                                                                 |
| c.2536G>C | p.Ala846Pro | 1/129                     | 0/67                          | 0                | 0           | 0      | 0                 | 1 (P)                     | 0                    | 27                | Deleterious (0.03)  | Probably damaging (0.999) | 27   | No change                                                                                                                                                        | Normal                      | Segregation in family (UG-R0781)                                                                                                                                                        |
| c.2537C>A | p.Ala846Asp | 5/129                     | 3/67                          | 0                | 0           | 0      | Present (DM)      | 1 (P)                     | 0                    | 126               | Deleterious (0.01)  | Probably damaging (0.999) | 31   | No change                                                                                                                                                        | Normal                      | Proven <i>de novo</i> ( <b>ROT-R02233</b> ); segregation in family (UAB-R3618; UG-R665)                                                                                                 |
| c.2540T>C | p.Leu847Pro | 58/129                    | 27/67                         | 0                | 0           | 0      | Present (DM)      | 11 (P)                    | Present (P)          | 98                | Deleterious (0.01)  | Probably damaging (0.997) | 26.1 | No change                                                                                                                                                        | Normal                      | Proven <i>de novo</i> (UAB-R9676; UAB-R2266; <b>ROT-R22853</b> ; <b>ROT-R17435</b> ; UG-R5831); segregation in multiple families (UAB-R4965; UAB-R3508; UG-R01; PAD-R500; MIL-R192/982) |
| c.2540T>G | p.Leu847Arg | 8/129                     | 2/67                          | 0                | 0           | 0      | Present (DM?)     | 2 (VUS)                   | 0                    | 102               | Deleterious (0)     | Probably damaging (0.997) | 27   | No change                                                                                                                                                        | Normal                      | Proven <i>de novo</i> (UAB-R6913; UG-R399)                                                                                                                                              |
| c.2542G>C | p.Gly848Arg | 8/129                     | 5/67                          | 0                | 0           | 0      | Present (DM)      | 1 (VUS)                   | Present (P)          | 125               | Deleterious (0.02)  | Probably damaging (1)     | 27.2 | No change                                                                                                                                                        | Normal                      | Proven <i>de novo</i> (UAB-R45401FN.201); segregation in multiple families (UAB-R1002; UAB-R1037; UAB-R2837; UG-R923; MIL-R999/399)                                                     |
| c.2542G>A | p.Gly848Arg | 6/129                     | 5/67                          | 0                | 0           | 0      | 0                 | 0                         | 0                    | 125               | Deleterious (0.02)  | Probably damaging (1)     | 28.2 | Creates a novel splice acceptor sequence in the exon that is used in a small fraction of transcripts: from WT cc/cc/cc to MUT - 83.0 / 9.7 / 0.9 / 84.5 (Fig S4) | Low level of r.2410_2543del | Proven <i>de novo</i> (UAB-R4476; UAB-R3513)                                                                                                                                            |
| c.2543G>A | p.Gly848Glu | 7/129                     | 4/67                          | 0                | 0           | 0      | Present (DM)      | 2 (P)                     | Present (NP)         | 98                | Deleterious (0.03)  | Probably damaging (1)     | 27.2 | Creates a novel splice acceptor sequence in the exon: from WT cc/cc/cc/ to MUT - 81.9 / - / - / 81.7 (Fig S4)                                                    | No missplicing observed     | Proven <i>de novo</i> (UAB-R1333; MAD-R9.232); segregation in family (SGR-REA; MAN-R95417G)                                                                                             |

**Abbreviations** - gnomAD: the **G**enome **A**ggregation **D**atabase; EVS: **E**xome **V**ariant **S**erver; 1000 G: **1000 G**enomes Project; HGMD: **H**uman **G**ene **M**utation **D**atabase; LOVD: **L**eiden **O**pen **V**ariation **D**atabase; CADD: **C**ombined **A**nnotation **D**ependent **D**epletion; SSF: **S**plice**S**ite**F**inder-like; HSF: **H**uman **S**plicing **F**inder; VUS: **v**ariant of **u**ncertain **s**ignificance; P: **p**athogenic; LP: **l**ikely **p**athogenic; DM: **d**isease causing; DM?: likely disease causing; NP: clinical significance **n**ot **p**rovided.

<sup>A</sup> The variants' classifications presented in round brackets have been exactly the same as reported by the original author(s). <sup>B</sup> Individuals proven *de novo* with the confirmed biological relationships are shown in bold.

**Table S3.** The classification of *NF1* missense mutations affecting codons 844-848 reported in the studied group: a comparison of the publicly available disease databases (LOVD, ClinVar and HGMD, as of 05/09/2017) with the current study.

| Variant   | Protein     | LOVD <sup>A</sup>                                                                   | ClinVar <sup>A</sup>                                                                | HGMD <sup>B</sup>                                                                                                                                                                                                                                                     | This study <sup>C</sup>                                                               |
|-----------|-------------|-------------------------------------------------------------------------------------|-------------------------------------------------------------------------------------|-----------------------------------------------------------------------------------------------------------------------------------------------------------------------------------------------------------------------------------------------------------------------|---------------------------------------------------------------------------------------|
| c.2530C>T | p.Leu844Phe |                                                                                     |    |  <sup>a,b</sup>                                                                                                                                                                      |    |
| c.2531T>A | p.Leu844His |                                                                                     |                                                                                     |                                                                                                                                                                                                                                                                       |    |
| c.2531T>C | p.Leu844Pro |                                                                                     |    |  <sup>b</sup>                                                                                                                                                                        |    |
| c.2531T>G | p.Leu844Arg |                                                                                     |    |    <sup>c-e</sup> |    |
| c.2533T>C | p.Cys845Arg |    |    |  <sup>f</sup>                                                                                                                                                                        |    |
| c.2534G>A | p.Cys845Tyr |    |    |  <sup>f</sup>                                                                                                                                                                        |    |
| c.2536G>C | p.Ala846Pro |    |                                                                                     |                                                                                                                                                                                                                                                                       |    |
| c.2537C>A | p.Ala846Asp |    |                                                                                     |  <sup>f</sup>                                                                                                                                                                        |    |
| c.2540T>C | p.Leu847Pro |    |    |    <sup>g,h</sup> |    |
| c.2540T>G | p.Leu847Arg |    |                                                                                     |  <sup>f</sup>                                                                                                                                                                        |    |
| c.2542G>A | p.Gly848Arg |                                                                                     |                                                                                     |                                                                                                                                                                                                                                                                       |    |
| c.2542G>C | p.Gly848Arg |  |  |  <sup>i</sup>                                                                                                                                                                      |  |
| c.2543G>A | p.Gly848Glu |  |  |  <sup>h</sup>                                                                                                                                                                      |  |

**Benign** 

**Likely benign** 

**Variant of uncertain significance** 

**Likely pathogenic** 

**Pathogenic** 

**Clinical significance not provided** 

<sup>A</sup> The variants' classification is provided as reported by the original author(s); <sup>B</sup> the originally reported variants' classifications have been reviewed and if necessary re-classified based on evidence for pathogenicity provided by the authors in the published papers and according to the ACMG recommendations; <sup>C</sup> the variants' classification according to the ACMG recommendations (details in Table S4).

**HGMD:** <sup>a</sup> reported in 1/93 unrelated NF1 individuals fulfilling the NIH diagnostic criteria; no phenotypic details available; no evidence for pathogenicity provided (Girodon-Boulant et al.<sup>19</sup>); <sup>b</sup> reported in 2/91 unrelated NF1 individuals fulfilling the NIH diagnostic criteria; no phenotypic details available; no evidence for pathogenicity provided (Mattocks et al.<sup>4</sup>); <sup>c</sup> reported once in sporadic case of 465 unrelated NF1 individuals; no phenotypic details available; no evidence for pathogenicity provided (Maynard et al.<sup>8</sup>); <sup>d</sup> proven *de novo*, no other evidence for pathogenicity provided (Wang et al.<sup>20</sup>); <sup>e</sup> proven *de novo*, absence in normal controls, phenotype highly specific for a disease (Bertola et al.<sup>14</sup>); <sup>f</sup> absence in normal controls, segregation studies, proven *de novo* with paternity confirmation, *in silico* analysis (van Minkelen et al.<sup>5</sup>); <sup>g</sup> reported in 1/521 unrelated NF1 individuals, *in silico* analysis, no other evidence for pathogenicity provided (Fahsold et al.<sup>21</sup>); <sup>h</sup> absence in normal controls, disease phenotype segregated with the mutation in familial cases, *in silico* analysis (De Luca et al.<sup>22</sup>; De Luca et al.<sup>23</sup>); <sup>i</sup> disease phenotype segregated with the mutation in familial cases, phenotype highly specific for a disease (Pascual-Castroviejo et al.<sup>17</sup>)

**Table S4.** The classification of *NF1* missense mutations affecting codons 844-848 reported in the studied group according to the ACMG recommendations.<sup>3</sup>

| Variant   | Protein     | PS1 | PS2 <sup>A</sup> | PS3             | PS4 | PM1 <sup>B</sup> | PM2 | PM3 | PM4 | PM5 <sup>C</sup> | PM6 <sup>D</sup> | PP1 <sup>E</sup> | PP2 | PP3 | PP4 <sup>F</sup> | PP5 <sup>G</sup>   | Variant classification <sup>H</sup> |
|-----------|-------------|-----|------------------|-----------------|-----|------------------|-----|-----|-----|------------------|------------------|------------------|-----|-----|------------------|--------------------|-------------------------------------|
| c.2530C>T | p.Leu844Phe | N/A | N/A              | ?               | YES | ?                | YES | N/A | N/A | YES              | YES              | N/A              | ?   | YES | YES              | NO                 | VUS → Pathogenic                    |
| c.2531T>G | p.Leu844Arg | N/A | N/A              | ?               | YES | ?                | NO  | N/A | N/A | N/A              | YES              | YES              | ?   | YES | YES              | YES <sup>2,3</sup> | Pathogenic → Pathogenic             |
| c.2531T>C | p.Leu844Pro | N/A | N/A              | ?               | YES | ?                | YES | N/A | N/A | YES              | YES              | N/A              | ?   | YES | YES              | NO                 | VUS → Pathogenic                    |
| c.2531T>A | p.Leu844His | N/A | N/A              | ?               | YES | ?                | YES | N/A | N/A | YES              | YES              | N/A              | ?   | YES | YES              | N/A                | ? → Pathogenic                      |
| c.2533T>C | p.Cys845Arg | N/A | N/A              | ?               | YES | ?                | YES | N/A | N/A | N/A              | YES              | N/A              | ?   | YES | YES              | YES <sup>1,3</sup> | Pathogenic → Pathogenic             |
| c.2534G>A | p.Cys845Tyr | N/A | N/A              | ?               | YES | ?                | YES | N/A | N/A | YES              | YES              | N/A              | ?   | YES | YES              | NO                 | VUS → Pathogenic                    |
| c.2536G>C | p.Ala846Pro | N/A | N/A              | ?               | YES | ?                | YES | N/A | N/A | N/A              | N/A              | YES              | ?   | YES | YES              | YES <sup>1</sup>   | Pathogenic → Pathogenic             |
| c.2537C>A | p.Ala846Asp | N/A | YES              | ?               | YES | ?                | YES | N/A | N/A | N/A              | N/A              | N/A              | ?   | YES | YES              | YES <sup>1,3</sup> | Pathogenic → Pathogenic             |
| c.2540T>C | p.Leu847Pro | N/A | YES              | ?               | YES | ?                | YES | N/A | N/A | N/A              | N/A              | YES              | ?   | YES | YES              | YES <sup>1,3</sup> | Pathogenic → Pathogenic             |
| c.2540T>G | p.Leu847Arg | N/A | N/A              | ?               | YES | ?                | YES | N/A | N/A | YES              | YES              | N/A              | ?   | YES | YES              | NO                 | VUS → Pathogenic                    |
| c.2542G>A | p.Gly848Arg | YES | N/A              | ?               | YES | ?                | YES | N/A | N/A | YES              | YES              | N/A              | ?   | YES | YES              | N/A                | ? → Pathogenic                      |
| c.2542G>C | p.Gly848Arg | N/A | N/A              | NO <sup>1</sup> | YES | ?                | YES | N/A | N/A | N/A              | YES              | YES              | ?   | YES | YES              | YES <sup>2,3</sup> | Pathogenic → Pathogenic             |
| c.2543G>A | p.Gly848Glu | N/A | N/A              | ?               | YES | ?                | YES | N/A | N/A | N/A              | YES              | YES              | ?   | YES | YES              | YES <sup>1,3</sup> | Pathogenic → Pathogenic             |

**PS1:** same amino acid change as a previously established pathogenic variant regardless of nucleotide change; **PS2:** proven *de novo* (both maternity and paternity confirmed); **PS3:** well-established functional studies; **PS4:** the prevalence of the variant in affected individuals is significantly increased compared to the prevalence in controls; **PM1:** located in a mutational hot spot and/or in critical functional domain; **PM2:** absent from controls; **PM3:** for recessive disorders, detected in *trans* with a pathogenic variant; **PM4:** protein length changes due to in-frame or stop-loss variants; **PM5:** novel missense change at amino acid residue where a different pathogenic missense change has been seen before; **PM6:** assumed *de novo*, but without confirmation of paternity and maternity; **PP1:** co-segregation with disease in multiple affected family members; **PP2:** missense variant in a gene that has a low rate of benign missense variation; **PP3:** multiple lines of computational evidence support a deleterious effect on the gene or gene product; **PP4:** individual's phenotype or family history is highly specific for a disease; **PP5:** reputable source reports variant as pathogenic; **N/A:** not applicable; **YES:** the criterion has been fulfilled; **NO:** the criterion has not been fulfilled; **?:** due to the lack of evidence, it is difficult to establish whether the criterion has been fulfilled or not.

<sup>A</sup> based on the data from LOVD database (only individuals confirmed as *de novo* and identified in the Netherlands where biological relationships were confirmed as part of the *de novo* assessment have been taken into account); <sup>B</sup> CSRD domain has not been proved to be critical to protein function (as function is largely unknown still), thus this evidence could not be considered as moderate evidence of pathogenicity; <sup>C</sup> variants classified as *pathogenic* in the publicly available disease databases (LOVD, ClinVar, HGMD) have been taken into account; <sup>D</sup> only individuals confirmed as *de novo* at UAB have been taken into account, except for variants fulfilling the PS2 criterion (p.Ala846Asp and p.Leu847Pro); <sup>E</sup> segregation with at least three affected family members needed to fulfill this criterion; <sup>F</sup> at least one individual with "classic" NF1 phenotype, including neurofibroma(s) and/or Lisch nodules was considered required to fulfill this criterion; <sup>G</sup> based on the variant's classification as pathogenic reported in LOVD (1), ClinVar (2) and/or HGMD (3) databases (details in Table S3); <sup>H</sup> prior variants classification as reported in the publicly available disease databases (LOVD, ClinVar, HGMD) and *a posteriori* classification based on our study and following the ACMG recommendations; <sup>1</sup> based on functional studies by Li et al.<sup>24</sup> and Toonen et al.<sup>25</sup>

**To classify variant as pathogenic the following criteria need to be fulfilled:** ≥2 strong (PS1-PS4) OR 1 strong (PS1-PS4) and ≥3 moderate (PM1-PM6) OR 1 strong (PS1-PS4) and 2 moderate (PM1-PM6) and ≥2 supporting (PP1-PP5) OR 1 strong (PS1-PS4) and 1 moderate (PM1-PM6) and ≥4 supporting (PP1-PP5).

**Table S5.** The age of the individuals who did present with CALMs-only (either >5 or < 6), but carried a missense mutation affecting one of five *NF1* codons 844-848 in this study.

| Family ID        | cDNA level | Protein level | Age group   | Family ID                | cDNA level          | Protein level            | Age group   |
|------------------|------------|---------------|-------------|--------------------------|---------------------|--------------------------|-------------|
| >5 CALMs         |            |               |             | <6 CALMs                 |                     |                          |             |
| UAB-R8475        | c.2530C>T  | p.Leu844Phe   | 14-18 years | UAB-R2696 <sup>A</sup>   | c.2534G>A           | p.Cys845Tyr              | 14-18 years |
| UAB-R8047        | c.2531T>C  | p.Leu844Pro   | 0-24 months | * UAB-R9135 <sup>B</sup> | c.2534G>A           | p.Cys845Tyr              | 19-26 years |
| ROT-R13734       | c.2534G>A  | p.Cys845Tyr   | 0-24 months | * UG-R5831 <sup>C</sup>  | c.2540T>C           | p.Leu847Pro              | 5-8 years † |
| UG-R391          | c.2534G>A  | p.Cys845Tyr   | 2-4 years   | UAB-R9493                | c.2542G>A           | p.Gly848Arg              | 5-8 years   |
| ROT-R36375       | c.2540T>G  | p.Leu847Arg   | 0-24 months | UAB-R1037-S2             | c.2542G>C           | p.Gly848Arg              | 0-24 months |
| UAB-R6913        | c.2540T>G  | p.Leu847Arg   | 5-8 years   | UAB-R2837-C1             | c.2542G>C           | p.Gly848Arg              | 2-4 years   |
| UAB-R09001FN.101 | c.2540T>C  | p.Leu847Pro   | 0-24 months | UAB-R2837-C3             | c.2542G>C           | p.Gly848Arg              | 2-4 years   |
| UAB-R6106        | c.2540T>C  | p.Leu847Pro   | 0-24 months | UAB-R2837-C2             | c.2542G>C           | p.Gly848Arg              | 5-8 years   |
| UAB-R3537        | c.2540T>C  | p.Leu847Pro   | 0-24 months | UAB-R1037-M              | c.2542G>C           | p.Gly848Arg              | >26 years   |
| ROT-R2CMUL       | c.2540T>C  | p.Leu847Pro   | 0-24 months | MAD-R9.232               | c.[2543G>A;4463G>A] | p.[Gly848Glu;Arg1488His] | 5-8 years   |
| CAR-R655763      | c.2540T>C  | p.Leu847Pro   | 0-24 months |                          |                     |                          |             |
| UG-R746          | c.2540T>C  | p.Leu847Pro   | 0-24 months |                          |                     |                          |             |
| UAB-R9676        | c.2540T>C  | p.Leu847Pro   | 2-4 years   |                          |                     |                          |             |
| ROT-R49013       | c.2540T>C  | p.Leu847Pro   | >26 years   |                          |                     |                          |             |
| UAB-R45401FN.201 | c.2542G>C  | p.Gly848Arg   | 9-13 years  |                          |                     |                          |             |
| UAB-R1333        | c.2543G>A  | p.Gly848Glu   | 0-24 months |                          |                     |                          |             |

<sup>A</sup> Individual had also two superficial plexiform neurofibromas on trunk and back and symptomatic spinal neurofibroma; <sup>B</sup> Individual had one superficial plexiform neurofibroma on trunk and no CALMs; <sup>C</sup> Individual had very severe phenotype, presenting shortly after birth; three plexiform neurofibromas, including right orbital tumor, one located in right middle ear and one on neck, visible from outside; protrusion of the right eye with hemangiomas on the right cheek confirmed by MRI; severe epilepsy with attacks occurring mostly in sleep or during feeding, causing vomiting; individual was not able to eat (tube feeding); deceased at age of ~8 years.

\* None CALMs had been observed in these individuals.



**Table S6.** Spinal neurofibromas in individuals carrying a missense mutation affecting one of five codons 844-848 in this study.

| Family ID                                      | cDNA level | Protein level | Family history | Age         | CALMs | Freckles | Neurofibromas                                                                                                                                                                  | Others                                                                                                                                                                                                                                                      | Comments                                                                                                                                                                                                                                                                                                                                                                                                                                                                                                                                  |
|------------------------------------------------|------------|---------------|----------------|-------------|-------|----------|--------------------------------------------------------------------------------------------------------------------------------------------------------------------------------|-------------------------------------------------------------------------------------------------------------------------------------------------------------------------------------------------------------------------------------------------------------|-------------------------------------------------------------------------------------------------------------------------------------------------------------------------------------------------------------------------------------------------------------------------------------------------------------------------------------------------------------------------------------------------------------------------------------------------------------------------------------------------------------------------------------------|
| <b><u>SYMPTOMATIC SPINAL NEUROFIBROMAS</u></b> |            |               |                |             |       |          |                                                                                                                                                                                |                                                                                                                                                                                                                                                             |                                                                                                                                                                                                                                                                                                                                                                                                                                                                                                                                           |
| UAB-R2696                                      | c.2534G>A  | p.Cys845Tyr   | PrS            | 14-18 years | <6    | -        | plexiform neurofibromas on trunk and back (visible from outside)                                                                                                               | mild scoliosis, hypertension, Noonan phenotype features                                                                                                                                                                                                     | MRI: innumerable spinal, intercostal, brachial and lumbosacral plexiform neurofibromas; large right-sided paraspinous neurofibroma in the lumbosacral region (12 cm in length)                                                                                                                                                                                                                                                                                                                                                            |
| UG-R399                                        | c.2540T>G  | p.Leu847Arg   | PrS            | 5-8 years   | >5    | NS       | plexiform neurofibroma on trunk (visible from outside and internal, without hyperpigmentation)                                                                                 | scoliosis, Noonan-phenotype features, abnormal development, gross motor delays, LD, ADHD, SD                                                                                                                                                                | extensive spinal neurofibromas on the costal nerves T8-11 right side; visible externally but much larger on MRI                                                                                                                                                                                                                                                                                                                                                                                                                           |
| UAB-R3508                                      | c.2540T>C  | p.Leu847Pro   | F              | 14-18 years | >5    | +        | plexiform neurofibromas on neck, trunk and left arm (visible from outside, with hyperpigmentation)                                                                             | symptomatic OPG, abnormal development, LD, ADD, ADHD                                                                                                                                                                                                        | none                                                                                                                                                                                                                                                                                                                                                                                                                                                                                                                                      |
| UAB-R01701FN.103                               | c.2540T>C  | p.Leu847Pro   | F              | 19-26 years | >5    | +        | plexiform neurofibromas on neck, left leg, left foot and abdomen (visible from outside); multiple cutaneous and subcutaneous neurofibromas on all parts of the body (#unknown) | Lisch nodules, LD, ADD                                                                                                                                                                                                                                      | spinal neurofibromas on T5-T6 and L4-L5 regions                                                                                                                                                                                                                                                                                                                                                                                                                                                                                           |
| UF-R1                                          | c.2540T>C  | p.Leu847Pro   | F              | 19-26 years | >5    | -        | large nodular neurofibroma on right thigh, surgically removed during the teenage years; some cutaneous (<10) and subcutaneous neurofibromas (#unknown)                         | scoliosis, chronic arthritis multiple joints, possible OPG (small lesion on optic nerve by MRI scan), Noonan phenotype features (PT, LSE, DPF), macrocephaly, non-ossifying fibroma on femur/knee, bilateral ankle clonus, knee hyperreflexia and esotropia | individual has suffered from proximal weakness in lower extremities that can be associated with the nerve root enlargements, significant difficulty walking, weakness of iliopsoas and quadriceps muscles; in addition, the individual has depigmented spots on back and left chest (vitiligo) and piebaldism (presence of white forelock); genetic analysis of <i>KIT</i> and <i>SNAI2</i> revealed presence of the <i>KIT</i> missense alteration c.1195G>A (p.Val399Ile), likely contributing to the piebaldism phenotype in this case |
| UAB-R0008                                      | c.2542G>A  | p.Gly848Arg   | RS             | 14-18 years | >5    | +        | -                                                                                                                                                                              | scoliosis, LD (dyslexia associated with working memory and phonological awareness issues), history of recurrent migraine headaches                                                                                                                          | p.Gly848Arg causing low level missplicing r.2410_2543del; father was diagnosed with a bilateral distal sensory neuropathy, his spinal MRI was normal                                                                                                                                                                                                                                                                                                                                                                                      |
| ROT-R95424                                     | c.2542G>C  | p.Gly848Arg   | F              | >26 years   | <6    | +        | 2-6 cutaneous and 2-6 subcutaneous neurofibromas                                                                                                                               | normal development, concentration problems, macrocephaly                                                                                                                                                                                                    | individual's mother has many small CALMs spots and some neurofibromas                                                                                                                                                                                                                                                                                                                                                                                                                                                                     |
| UAB-R1002                                      | c.2542G>C  | p.Gly848Arg   | F              | 19-26 years | >5    | +        | mediastinal mass on chest (internal) and large plexiform neurofibroma bilateral on both sides of neck; 1 cutaneous neurofibroma in the right ear filling the entire canal      | scoliosis, hypertension, renal artery stenosis, conductive hearing loss in the right ear, likely secondary to right ear being filled with a neurofibroma                                                                                                    | individual's brother, father and paternal uncle have NF1                                                                                                                                                                                                                                                                                                                                                                                                                                                                                  |
| UG-R923                                        | c.2542G>C  | p.Gly848Arg   | F              | 19-26 years | 0     | -        | plexiform neurofibromas on both sides of the neck                                                                                                                              | moderate scoliosis, LD, ADHD                                                                                                                                                                                                                                | clumsiness with impaired walking, moderate atrophy of the distal leg muscles; generalized nerve sheath tumors, presence of symmetric neurofibromas in all spinal nerves of the body following the peripheral course of the nerves; case reported by Pascual-Castroviejo et al. <sup>17</sup>                                                                                                                                                                                                                                              |
| UAB-R2492                                      | c.2543G>A  | p.Gly848Glu   | F              | >26 years   | >5    | -        | plexiform neurofibroma on right leg (visible from outside); 100-500 cutaneous/subcutaneous neurofibromas                                                                       | macrocephaly                                                                                                                                                                                                                                                | none                                                                                                                                                                                                                                                                                                                                                                                                                                                                                                                                      |

### SYMPTOMATIC SPINAL NEUROFIBROMAS

|               |           |             |    |           |    |   |                                                                                                                                       |                                                                                                                                     |                                                                                                                                                                                                                                                                                                                                   |
|---------------|-----------|-------------|----|-----------|----|---|---------------------------------------------------------------------------------------------------------------------------------------|-------------------------------------------------------------------------------------------------------------------------------------|-----------------------------------------------------------------------------------------------------------------------------------------------------------------------------------------------------------------------------------------------------------------------------------------------------------------------------------|
| UAB-R3237     | c.2543G>A | p.Gly848Glu | RS | >26 years | <6 | + | plexiform neurofibromas on head, neck, left and right leg (visible from outside, without hyperpigmentation); 1 cutaneous neurofibroma | asymptomatic OPG, Lisch nodules                                                                                                     | none                                                                                                                                                                                                                                                                                                                              |
| MAN-R95417G   | c.2543G>A | p.Gly848Glu | F  | >26 years | 0  | + | multiple cutaneous and subcutaneous neurofibromas developed from her teenage years                                                    | SS, macrocephaly, normal development, possible Noonan phenotype (specific facial features, but no details available)                | MRI: tumors present on nerve roots throughout the neuroaxis, particularly around the cauda equina, and a large retroperitoneal mass; repeated few years later MRI showed a very extensive burden of nerve sheath tumors, involving the large majority of spinal nerve roots; case reported by Burkitt-Wright et al. <sup>18</sup> |
| MAN-R95417G-C | c.2543G>A | p.Gly848Glu | F  | >26 years | 0  | - | -                                                                                                                                     | Lisch nodules, pectus carinatum, normal development, possible Noonan phenotype (specific facial features, but no details available) | MRI: a very extensive burden of nerve sheath tumors, including a particularly large lobulated lesion in the occipital/posterior neck region; case reported by Burkitt-Wright et al. <sup>18</sup>                                                                                                                                 |

### ASYMPTOMATIC SPINAL NEUROFIBROMAS

|              |           |             |    |             |    |   |                                                                                                                                                                                                                                                                                                                                       |                                                                                                       |                                                                                                                                                                                                                                                                      |
|--------------|-----------|-------------|----|-------------|----|---|---------------------------------------------------------------------------------------------------------------------------------------------------------------------------------------------------------------------------------------------------------------------------------------------------------------------------------------|-------------------------------------------------------------------------------------------------------|----------------------------------------------------------------------------------------------------------------------------------------------------------------------------------------------------------------------------------------------------------------------|
| UAB-R0147    | c.2534G>A | p.Cys845Tyr | RS | 19-26 years | >5 | + | innumerable solitary and plexiform neurofibromas on left arm, neck, trunk, left leg, right leg, abdomen (visible from outside, with hyperpigmentation); left arm extensive neurofibroma confirmed histopathologically as a focally cellular neurofibroma with degenerative atypia; 6-99 cutaneous and 6-99 subcutaneous neurofibromas | abnormal development, LD                                                                              | numerous subcentimeter subcutaneous scalp solitary T2 hyperintense nodules; likely small peripheral nerve sheath tumors?                                                                                                                                             |
| ROT-R21382   | c.2540T>C | p.Leu847Pro | F  | >26 years † | >5 | + | left nervus ischiadicus, surgically removed; >500 cutaneous and 6-99 subcutaneous neurofibromas                                                                                                                                                                                                                                       | pericarditis carcinomatosa, metastasized MPNST, superior vena cava syndrome (SVCS), dyspnea on effort | individual died of MPNST at age of 30 years; family history: affected mother and sister                                                                                                                                                                              |
| UG-R01-C1    | c.2540T>C | p.Leu847Pro | F  | 14-18 years | >5 | + | plexiform neurofibroma on trunk (visible from outside); 2-6 cutaneous neurofibromas                                                                                                                                                                                                                                                   | scoliosis, short stature, odontogenic fibroma lower jaw (removed at age of 11)                        | individual attends vocational training; muscular build; paravertebral plexiform neurofibroma at the site of scoliosis surgery                                                                                                                                        |
| MIL-R999/399 | c.2542G>C | p.Gly848Arg | F  | 19-26 years | <6 | - | 2-6 cutaneous and 2-6 subcutaneous neurofibromas                                                                                                                                                                                                                                                                                      | scoliosis, mitral insufficiency, Lisch nodules                                                        | none                                                                                                                                                                                                                                                                 |
| UG-R923-S    | c.2542G>C | p.Gly848Arg | F  | 14-18 years | <6 | - | several cutaneous neurofibromas, #unknown                                                                                                                                                                                                                                                                                             | symptomatic OPG, scoliosis, short stature, cerebellar cystic tumors, borderline mental level, LD      | <u>brain MRI</u> : glial cystic tumor of low degree of malignancy in the left cerebellar hemisphere; symmetrical spinal neurofibromas that affected all the spinal nerves; case reported by Pascual-Castroviejo et al. <sup>17</sup>                                 |
| UG-R923-M    | c.2542G>C | p.Gly848Arg | F  | >26 years   | <6 | - | several cutaneous-subcutaneous neurofibromas                                                                                                                                                                                                                                                                                          | -                                                                                                     | individual showed asymmetrical spinal neurofibromas in all the spinal nerves; her father died at 40 years of age of multiple hepatic neurofibromas, but reportedly had no cutaneous manifestations of NF1; case reported by Pascual-Castroviejo et al. <sup>17</sup> |
| SGR-REA      | c.2543G>A | p.Gly848Glu | F  | >26 years   | >5 | - | -                                                                                                                                                                                                                                                                                                                                     | mild pulmonic insufficiency, Lisch nodules                                                            | none                                                                                                                                                                                                                                                                 |

**PrS:** proven sporadic; **F:** familial; **RS:** reportedly sporadic; **NS:** not specified; **LD:** learning difficulties; **SD:** speech delay; **ADD:** attention deficit disorder; **ADHD:** attention deficit hyperactivity disorder; **OPG:** optic pathway glioma; **SVCS:** superior vena cava syndrome; **MPNST:** malignant peripheral nerve sheath tumor; **PT:** ptosis; **LSE:** low set ears; **DPF:** downslanting palpebral fissures

**Table S7.** Optic pathway gliomas in individuals carrying a missense mutation affecting one of five codons 844-848 in this study.

| Family ID                                | cDNA level | Protein level | Family history | Age           | CALMs | Freckles | Neurofibromas                                                                                                                                           | Others                                                                                                                                                                                                         | Comments                                                                                                                                                                                                                                                                                                                                                                                                                                                                                                                   |
|------------------------------------------|------------|---------------|----------------|---------------|-------|----------|---------------------------------------------------------------------------------------------------------------------------------------------------------|----------------------------------------------------------------------------------------------------------------------------------------------------------------------------------------------------------------|----------------------------------------------------------------------------------------------------------------------------------------------------------------------------------------------------------------------------------------------------------------------------------------------------------------------------------------------------------------------------------------------------------------------------------------------------------------------------------------------------------------------------|
| <b>SYMPTOMATIC OPTIC PATHWAY GLIOMAS</b> |            |               |                |               |       |          |                                                                                                                                                         |                                                                                                                                                                                                                |                                                                                                                                                                                                                                                                                                                                                                                                                                                                                                                            |
| UAB-R624                                 | c.2531T>G  | p.Leu844Arg   | PrS            | 14-18 years   | >5    | +        | plexiform neurofibroma on right cheek; cutaneous neurofibromas (#unknown)                                                                               | bowled long bones, pectus carinatum, pulmonic stenosis, aortic coarctation, Noonan-phenotype features (and presence of pathogenic <i>PTPN11</i> mutation), short stature, pilocytic astrocytoma, Lisch nodules | MRI: bulky optic nerves, especially on the right, and a solid expansive lesion in the suprasellar region involving the optic chiasm and deforming the third ventricle; at 7 years of age, the individual complained of visual loss and cranial MRI showed progression with signs of hydrocephalus; the tumor, a pilocytic astrocytoma, was partially resected at age of 8 years; no further therapy was administered and the individual experienced progressive visual loss; case reported by Bertola et al. <sup>14</sup> |
| PAD-R300                                 | c.2531T>C  | p.Leu844Pro   | RS             | 2-4 years     | >5    | +        | -                                                                                                                                                       | hypothalamic glioma, abnormal development, SD                                                                                                                                                                  | OPG involved optic nerves and chiasm                                                                                                                                                                                                                                                                                                                                                                                                                                                                                       |
| ROT-R02233                               | c.2537C>A  | p.Ala846Asp   | PrS            | 14-18 years   | >5    | +        | plexiform neurofibroma on head (visible from outside, without hyperpigmentation); 2-6 cutaneous neurofibromas                                           | normal development, executive function problems                                                                                                                                                                | none                                                                                                                                                                                                                                                                                                                                                                                                                                                                                                                       |
| UG-R665                                  | c.2537C>A  | p.Ala846Asp   | F              | 5-8 years     | >5    | +        | -                                                                                                                                                       | LD, ADHD, hemangioma left (2-3 cm)                                                                                                                                                                             | OPG involved optic nerves, especially on the left, and chiasm                                                                                                                                                                                                                                                                                                                                                                                                                                                              |
| UL-R83988968                             | c.2540T>G  | p.Leu847Arg   | RS             | 5-8 years     | >5    | -        | -                                                                                                                                                       | hypertension, Noonan-like features, macrocephaly, short stature, juvenile xanthogranulomas, LD, Lisch nodules                                                                                                  | OPG involved optic nerves; individual needed treatment for <b>pubertas precox</b> ; hyper nasal speech after adenoidectomy and tonsillectomy                                                                                                                                                                                                                                                                                                                                                                               |
| UAB-R3508                                | c.2540T>C  | p.Leu847Pro   | F              | 14-18 years   | >5    | +        | plexiform neurofibromas on neck, trunk and left arm (visible from outside, with hyperpigmentation); symptomatic spinal neurofibromas (unilateral C1-C3) | short stature, abnormal development, LD, ADD, ADHD                                                                                                                                                             | OPG involved optic nerves; individual treated with bevacizumab and chemotherapy for 9-10 months; OPG is no longer symptomatic                                                                                                                                                                                                                                                                                                                                                                                              |
| CAR-R8012M6                              | c.2540T>C  | p.Leu847Pro   | NS             | 5-8 years     | >5    | NS       | NS                                                                                                                                                      | individual attends special school (LD?)                                                                                                                                                                        | none                                                                                                                                                                                                                                                                                                                                                                                                                                                                                                                       |
| MAD-R3.793                               | c.2540T>C  | p.Leu847Pro   | RS             | 19-26 years   | >5    | +        | plexiform neurofibroma on left side of the face (visible from outside) and orbital neurofibroma resected                                                | scoliosis, sphenoid wing dysplasia, short stature, macrocephaly, LD, Lisch nodules                                                                                                                             | OPG involved left optic nerves and chiasm; hemimegalencephaly with parenchymal atrophy and complex partial seizures                                                                                                                                                                                                                                                                                                                                                                                                        |
| UG-R01-S1                                | c.2540T>C  | p.Leu847Pro   | F              | >26 years     | >5    | +        | -                                                                                                                                                       | short stature, focal epilepsy, psychiatric problems                                                                                                                                                            | -                                                                                                                                                                                                                                                                                                                                                                                                                                                                                                                          |
| UAB-R1474                                | c.2542G>A  | p.Gly848Arg   | RS             | 5-8 years     | >5    | +        | 2-6 intradermal neurofibromas                                                                                                                           | pectus carinatum, macrocephaly, embryonal rhabdomyosarcoma, abnormal development, gross motor delays, LD, ADHD, Lisch nodules                                                                                  | OPG involved optic nerves and chiasm; p.Gly848Arg causing low level missplicing r.2410_2543del                                                                                                                                                                                                                                                                                                                                                                                                                             |
| UG-R923-S                                | c.2542G>C  | p.Gly848Arg   | F              | 14-18 years   | <6    | -        | several cutaneous neurofibromas (#unknown); asymptomatic spinal neurofibromas affected all the spinal nerves                                            | scoliosis, short stature, cerebellar cystic tumors, LD                                                                                                                                                         | OPG involved left optic nerve and chiasm; MRI: glial cystic tumor with low degree of malignancy in the left cerebellar hemisphere                                                                                                                                                                                                                                                                                                                                                                                          |
| SGR-REA-S                                | c.2543G>A  | p.Gly848Glu   | F              | 19-26 years † | >5    | -        | plexiform neurofibroma on neck (visible from outside, without hyperpigmentation)                                                                        | short stature, MPNST                                                                                                                                                                                           | OPG involved optic chiasm                                                                                                                                                                                                                                                                                                                                                                                                                                                                                                  |

**PrS:** proven sporadic; **F:** familial; **RS:** reportedly sporadic; **LD:** learning difficulties; **SD:** speech delay; **ADD:** attention deficit disorder; **ADHD:** attention deficit hyperactivity disorder; **MPNST:** malignant peripheral nerve sheath tumor; **OPG:** optic pathway glioma; **NS:** not specified

| Family ID                                        | cDNA level | Protein level | Family history | Age         | CALMs | Freckles | Neurofibromas                                                                                                                                                          | Others                                                                                                                                                                        | Comments                                                                                                                        |
|--------------------------------------------------|------------|---------------|----------------|-------------|-------|----------|------------------------------------------------------------------------------------------------------------------------------------------------------------------------|-------------------------------------------------------------------------------------------------------------------------------------------------------------------------------|---------------------------------------------------------------------------------------------------------------------------------|
| <b><u>ASYMPTOMATIC OPTIC PATHWAY GLIOMAS</u></b> |            |               |                |             |       |          |                                                                                                                                                                        |                                                                                                                                                                               |                                                                                                                                 |
| UAB-R0903                                        | c.2530C>T  | p.Leu844Phe   | PrS            | 9-13 years  | >5    | +        | absent                                                                                                                                                                 | LD, special education                                                                                                                                                         | none                                                                                                                            |
| UAB-R0713                                        | c.2531T>G  | p.Leu844Arg   | RS             | 5-8 years   | >5    | +        | 2-6 cutaneous neurofibromas                                                                                                                                            | macrocephaly, abnormal development                                                                                                                                            | OPG involved optic nerves                                                                                                       |
| MIL-R168                                         | c.2531T>G  | p.Leu844Arg   | RS             | >26 years   | >5    | -        | 2-6 cutaneous and 2-6 subcutaneous neurofibromas                                                                                                                       | scoliosis, possible brainstem glioma, Lisch nodules                                                                                                                           | OPG involved optic nerves                                                                                                       |
| SGR-RSO                                          | c.2531T>G  | p.Leu844Arg   | RS             | 19-26 years | >5    | +        | absent                                                                                                                                                                 | scoliosis                                                                                                                                                                     | none                                                                                                                            |
| UAB-R3714                                        | c.2531T>C  | p.Leu844Pro   | PrS            | 0-24 months | >5    | +        | absent                                                                                                                                                                 | Lisch nodules                                                                                                                                                                 | none                                                                                                                            |
| UAB-R0252                                        | c.2540T>C  | p.Leu847Pro   | RS             | 19-26 years | >5    | +        | plexiform neurofibroma on trunk (with hyperpigmentation); 2-6 cutaneous, 2-6 subcutaneous and 2-6 intradermal neurofibromas                                            | -                                                                                                                                                                             | none                                                                                                                            |
| UAB-R2934                                        | c.2540T>C  | p.Leu847Pro   | F              | 19-26 years | >5    | +        | 2-6 cutaneous, 2-6 subcutaneous and 2-6 intradermal neurofibromas                                                                                                      | Lisch nodules                                                                                                                                                                 | bilateral OPG, no OPG treatment                                                                                                 |
| UAB-R4965                                        | c.2540T>C  | p.Leu847Pro   | F              | 14-18 years | >5    | +        | a few subcutaneous neurofibromas on lower back                                                                                                                         | Lisch nodules, bone cysts, LD, ADD, Asperger syndrome, anger problems, mild hearing loss, migraines, non-ossifying fibroma of the right knee and anger/impulse control issues | OPG involved optic nerves and chiasm; individual had a tethered cord repair and had complaints of chronic pain in various areas |
| UAB-R2546                                        | c.2540T>C  | p.Leu847Pro   | RS             | 14-18 years | >5    | +        | a few subcutaneous neurofibromas                                                                                                                                       | ADD, migraine headaches (very strong family history of migraines); unusual bone infarctions at the site of some probable non-ossifying fibromas                               | OPG involved left chiasm and has been present for many years; it has remained asymptomatic and unchanged in size                |
| UAB-R1928                                        | c.2540T>C  | p.Leu847Pro   | RS             | 19-26 years | >5    | +        | 6-99 cutaneous, 2-6 subcutaneous and 2-6 intradermal neurofibromas                                                                                                     | dural ectasia, 4 <sup>th</sup> lumbar vertebrae fragmentation, mild pervasive developmental delay, LD                                                                         | OPG involved optic nerves                                                                                                       |
| MAD-R3.7001                                      | c.2540T>C  | p.Leu847Pro   | RS             | 5-8 years   | >5    | +        | plexiform neurofibroma on head (visible from outside); 2-6 cutaneous neurofibromas                                                                                     | Lisch nodules, macrocephaly, LD                                                                                                                                               | OPG involved optic nerves                                                                                                       |
| MAD-R3.409                                       | c.2540T>C  | p.Leu847Pro   | RS             | 9-13 years  | >5    | +        | absent                                                                                                                                                                 | LD                                                                                                                                                                            | MRI: anomalous posterior fossa venous drainage; OPG involved left optic nerve                                                   |
| MIL-R361/018                                     | c.2540T>C  | p.Leu847Pro   | F              | 14-18 years | >5    | +        | absent                                                                                                                                                                 | abnormal development                                                                                                                                                          | OPG involved optic nerves, especially on the left; MRI: unidentified bright objects (UBOs)                                      |
| ROT-R89874                                       | c.2540T>C  | p.Leu847Pro   | F              | 9-13 years  | >5    | +        | absent                                                                                                                                                                 | abnormal development                                                                                                                                                          | none                                                                                                                            |
| UG-R004                                          | c.2540T>C  | p.Leu847Pro   | F              | 9-13 years  | >5    | +        | 2-6 subcutaneous neurofibromas                                                                                                                                         | ADD, ADHD, special education (LD?)                                                                                                                                            | OPG involved left optic nerve and chiasm; brother was diagnosed with ADHD, but no NF1                                           |
| UG-R01                                           | c.2540T>C  | p.Leu847Pro   | F              | >26 years   | >5    | +        | 2-6 cutaneous and 2-6 intradermal neurofibromas (symptomatic internal neurofibroma in left knee)                                                                       | Lisch nodules, bone cysts in femur                                                                                                                                            | OPG has remained asymptomatic for 16 years                                                                                      |
| UAB-R3513                                        | c.2542G>A  | p.Gly848Arg   | F              | 2-4 years   | >5    | +        | 2-6 cutaneous neurofibromas                                                                                                                                            | -                                                                                                                                                                             | individual's brother has developmental delay, but he does not have any NF pigmentary signs                                      |
| UAB-R3237                                        | c.2543G>A  | p.Gly848Glu   | RS             | >26 years   | <6    | +        | plexiform neurofibromas on head, neck, left and right leg (visible from outside, without hyperpigmentation); 1 cutaneous neurofibroma, symptomatic spinal neurofibroma | -                                                                                                                                                                             | OPG involved optic nerves                                                                                                       |

PrS: proven sporadic; F: familial; RS: reportedly sporadic; LD: learning difficulties; ADD: attention deficit disorder; ADHD: attention deficit hyperactivity disorder; OPG: optic pathway glioma

**Table S8.** Malignant neoplasms in individuals carrying a missense mutation affecting one of five codons 844-848 in this study.

| Family ID               | cDNA level | Protein level | Family history | Age           | CALMs | Freckles | Neurofibromas                                                                                                                                        | Others                                                                                                             | Comments                                                                                                                                                                                                                                                                                                                                                                                                  |
|-------------------------|------------|---------------|----------------|---------------|-------|----------|------------------------------------------------------------------------------------------------------------------------------------------------------|--------------------------------------------------------------------------------------------------------------------|-----------------------------------------------------------------------------------------------------------------------------------------------------------------------------------------------------------------------------------------------------------------------------------------------------------------------------------------------------------------------------------------------------------|
| <b>RHABDOMYOSARCOMA</b> |            |               |                |               |       |          |                                                                                                                                                      |                                                                                                                    |                                                                                                                                                                                                                                                                                                                                                                                                           |
| UAB-R1227               | c.2540T>C  | p.Leu847Pro   | RS             | 2-4 years     | >5    | +        | plexiform neurofibroma on back (visible from outside, with hyperpigmentation)                                                                        | normal development                                                                                                 | MRI: mass in left lobe of liver with possible involvement of the right atrium (diagnosis: embryonal rhabdomyosarcoma)                                                                                                                                                                                                                                                                                     |
| ROT-R49013              | c.2540T>C  | p.Leu847Pro   | RS             | >26 years     | >5    | NS       | -                                                                                                                                                    | scoliosis, macrocephaly                                                                                            | <b>embryonal rhabdomyosarcoma</b> of left testis at 2 years old and <b>astrocytoma grade II</b> at 15 years old                                                                                                                                                                                                                                                                                           |
| UAB-R1474               | c.2542G>A  | p.Gly848Arg   | RS             | 5-8 years     | >5    | +        | 2-6 intradermal neurofibromas                                                                                                                        | Lisch nodules, symptomatic OPG, pectus carinatum, macrocephaly, abnormal development, gross motor delays, LD, ADHD | diagnosis: embryonal rhabdomyosarcoma; p.Gly848Arg causing low level missplicing r.2410_2543del                                                                                                                                                                                                                                                                                                           |
| <b>MPNST</b>            |            |               |                |               |       |          |                                                                                                                                                      |                                                                                                                    |                                                                                                                                                                                                                                                                                                                                                                                                           |
| MAN-R48902G             | c.2530C>T  | p.Leu844Phe   | F              | >26 years     | >5    | +        | 6-99 cutaneous, 2-6 subcutaneous and 2-6 intradermal neurofibromas                                                                                   | hypertension                                                                                                       | low grade MPNST in right distal femur                                                                                                                                                                                                                                                                                                                                                                     |
| CAR-R18010M61           | c.2540T>C  | p.Leu847Pro   | F              | >26 years     | >5    | +        | 6-99 cutaneous neurofibromas                                                                                                                         | -                                                                                                                  | individual has two sisters with multiple neurofibromas and brother who had colorectal cancer in his 40s                                                                                                                                                                                                                                                                                                   |
| CAR-RNIS                | c.2540T>C  | p.Leu847Pro   | F              | >26 years     | <6    | -        | plexiform neurofibroma in pelvis; 100-500 cutaneous neurofibromas                                                                                    | -                                                                                                                  | <b>MPNST and breast cancer</b> ; genetic <i>BRC1/2</i> testing was negative by whole exome sequencing (WES); WES analysis revealed the presence of p.Leu847Pro in all the three tumors and independent somatic "second hits" in <i>NF1</i> as well as multiple copy number changes in the breast cancer and MPNST, but not in the plexiform neurofibroma; case reported by McPherson et al. <sup>16</sup> |
| ROT-R21382              | c.2540T>C  | p.Leu847Pro   | F              | >26 years †   | >5    | +        | left nervus ischiadicus, surgically removed; >500 cutaneous and 6-99 subcutaneous neurofibromas, asymptomatic spinal neurofibromas (from T11 and up) | pericarditis carcinomatosa, superior vena cava syndrome (SVCS) and dyspnea on effort                               | metastasized MPNST; <b>individual died of MPNST at age of 30 years</b>                                                                                                                                                                                                                                                                                                                                    |
| UG-R01-S2               | c.2540T>C  | p.Leu847Pro   | F              | 19-26 years † | >5    | +        | cutaneous and subcutaneous neurofibromas (#unknown); possible internal tumors                                                                        | -                                                                                                                  | malignant MPNST of mediastinum and abdomen; <b>individual died of MPNST at age of 25 years</b>                                                                                                                                                                                                                                                                                                            |
| UG-R01-S3               | c.2540T>C  | p.Leu847Pro   | F              | 19-26 years † | NS    | NS       | NS                                                                                                                                                   | NS                                                                                                                 | <b>individual died of MPNST at age of 20 years</b> ; individual was diagnosed with NF1, no further information available                                                                                                                                                                                                                                                                                  |
| SGR-REA-S               | c.2543G>A  | p.Gly848Glu   | F              | 19-26 years † | >5    | -        | plexiform neurofibroma on neck (visible from outside, without hyperpigmentation)                                                                     | symptomatic OPG, short stature                                                                                     | <b>individual died of MPNST at age of 26 years</b>                                                                                                                                                                                                                                                                                                                                                        |
| <b>OTHERS</b>           |            |               |                |               |       |          |                                                                                                                                                      |                                                                                                                    |                                                                                                                                                                                                                                                                                                                                                                                                           |
| UG-R01-M                | c.2540T>C  | p.Leu847Pro   | F              | >26 years †   | >5    | +        | cutaneous neurofibromas (#unknown); possible internal neurofibroma                                                                                   | Lisch nodules                                                                                                      | <b>individual died of metastasized colon cancer (adenocarcinoma) at age of 54 years</b>                                                                                                                                                                                                                                                                                                                   |
| MIL-R192/982-F          | c.2540T>C  | p.Leu847Pro   | F              | >26 years     | <6    | +        | plexiform neurofibroma on palate (without hyperpigmentation); 6-99 cutaneous and 2-6 subcutaneous neurofibromas                                      | Lisch nodules, scoliosis, severe mood depression                                                                   | <b>medullary thyroid carcinoma</b>                                                                                                                                                                                                                                                                                                                                                                        |
| UAB-R9493               | c.2542G>A  | p.Gly848Arg   | F              | 5-8 years     | <6    | -        | -                                                                                                                                                    | -                                                                                                                  | <b>NF1-associated JMML</b> (second hit identified: c.1246C>T, p.Arg416*)                                                                                                                                                                                                                                                                                                                                  |

F: familial; RS: reportedly sporadic; NS: not specified; LD: learning difficulties; ADHD: attention deficit hyperactivity disorder; OPG: optic pathway glioma; JMML: juvenile myelomonocytic leukemia

**Table S9.** Comparison of clinical features (malignant neoplasms, >5 CALMs, skinfold freckles, cutaneous and symptomatic spinal neurofibromas) in cohorts of individuals carrying different missense mutations affecting codons 844-848 - additional statistical calculations.

| NF1 clinical features                           | Number of individuals (%) |                               | p value (2-tailed Fisher's exact test) |
|-------------------------------------------------|---------------------------|-------------------------------|----------------------------------------|
|                                                 | p.Leu847Pro               | Other mutations in AA 844-848 |                                        |
| Malignant neoplasms $\geq$ 14 years             | 8/38 (21.1)               | 2/40 (5)                      | <b>0.0448</b>                          |
|                                                 | p.Gly848                  | Other mutations in AA 844-848 |                                        |
| Symptomatic spinal neurofibromas $\geq$ 9 years | 8/20 (40)                 | 4/59 (6.8)                    | <b>0.0012</b>                          |
| >5 CALMs                                        | 15/34 (44.1)              | 115/123 (93.5)                | <b>&lt;0.0001</b>                      |
| Skinfold freckles $\geq$ 9 years                | 11/23 (47.8)              | 65/72 (90.3)                  | <b>&lt;0.0001</b>                      |
| Cutaneous neurofibromas $\geq$ 19 years         | 5/18 (27.8)               | 42/51 (82.4)                  | <b>&lt;0.0001</b>                      |

**Table S10.** List of all adjusted p-values after applying the Benjamini-Hochberg correction for multiple testing with false discovery rates at 0.05 and 0.01.

| p-value | index | Statistical significance at p<0.05 |                    | Statistical significance at p<0.01 |                    |
|---------|-------|------------------------------------|--------------------|------------------------------------|--------------------|
|         |       | B-H critical <sup>A</sup>          | value <sup>B</sup> | B-H critical <sup>A</sup>          | value <sup>B</sup> |
| 0.8794  | 1     | 0.0250                             |                    | 0.0050                             |                    |
| 0.5830  | 2     | 0.0246                             |                    | 0.0049                             |                    |
| 0.5727  | 3     | 0.0242                             |                    | 0.0048                             |                    |
| 0.4489  | 4     | 0.0237                             |                    | 0.0047                             |                    |
| 0.4296  | 5     | 0.0233                             |                    | 0.0047                             |                    |
| 0.3590  | 6     | 0.0229                             |                    | 0.0046                             |                    |
| 0.2968  | 7     | 0.0225                             |                    | 0.0045                             |                    |
| 0.2916  | 8     | 0.0220                             |                    | 0.0044                             |                    |
| 0.1349  | 9     | 0.0216                             |                    | 0.0043                             |                    |
| 0.1323  | 10    | 0.0212                             |                    | 0.0042                             |                    |
| 0.1160  | 11    | 0.0208                             |                    | 0.0042                             |                    |
| 0.1029  | 12    | 0.0203                             |                    | 0.0041                             |                    |
| 0.0693  | 13    | 0.0199                             |                    | 0.0040                             |                    |
| 0.0619  | 14    | 0.0195                             |                    | 0.0039                             |                    |
| 0.0451  | 15    | 0.0191                             |                    | 0.0038                             |                    |
| 0.0409  | 16    | 0.0186                             |                    | 0.0037                             |                    |
| 0.0404  | 17    | 0.0182                             |                    | 0.0036                             |                    |
| 0.0384  | 18    | 0.0178                             |                    | 0.0036                             |                    |
| 0.0341  | 19    | 0.0174                             |                    | 0.0035                             |                    |
| 0.0276  | 20    | 0.0169                             |                    | 0.0034                             |                    |
| 0.0263  | 21    | 0.0165                             |                    | 0.0033                             |                    |
| 0.0241  | 22    | 0.0161                             |                    | 0.0032                             |                    |
| 0.0186  | 23    | 0.0157                             |                    | 0.0031                             |                    |
| 0.0174  | 24    | 0.0153                             |                    | 0.0031                             |                    |
| 0.0164  | 25    | 0.0148                             |                    | 0.0030                             |                    |
| 0.0125  | 26    | 0.0144                             | *                  | 0.0029                             |                    |
| 0.0080  | 27    | 0.0140                             | *                  | 0.0028                             |                    |
| 0.0076  | 28    | 0.0136                             | *                  | 0.0027                             |                    |
| 0.0067  | 29    | 0.0131                             | *                  | 0.0026                             |                    |
| 0.0061  | 30    | 0.0127                             | *                  | 0.0025                             |                    |
| 0.0060  | 31    | 0.0123                             | *                  | 0.0025                             |                    |
| 0.0043  | 32    | 0.0119                             | *                  | 0.0024                             |                    |
| 0.0042  | 33    | 0.0114                             | *                  | 0.0023                             |                    |
| 0.0028  | 34    | 0.0110                             | *                  | 0.0022                             |                    |
| 0.0025  | 35    | 0.0106                             | *                  | 0.0021                             |                    |
| 0.0023  | 36    | 0.0102                             | *                  | 0.0020                             |                    |
| 0.0022  | 37    | 0.0097                             | *                  | 0.0019                             |                    |
| 0.0020  | 38    | 0.0093                             | *                  | 0.0019                             |                    |
| 0.0012  | 39    | 0.0089                             | *                  | 0.0018                             | *                  |
| 0.0007  | 40    | 0.0085                             | *                  | 0.0017                             | *                  |
| 0.0005  | 41    | 0.0081                             | *                  | 0.0016                             | *                  |
| 0.0004  | 42    | 0.0076                             | *                  | 0.0015                             | *                  |
| 0.0002  | 43    | 0.0072                             | *                  | 0.0014                             | *                  |
| 0.0002  | 44    | 0.0068                             | *                  | 0.0014                             | *                  |
| 0.0001  | 45    | 0.0064                             | *                  | 0.0013                             | *                  |
| 0.0001  | 46    | 0.0059                             | *                  | 0.0012                             | *                  |
| 0.0001  | 47    | 0.0055                             | *                  | 0.0011                             | *                  |
| 0.0001  | 48    | 0.0051                             | *                  | 0.0010                             | *                  |
| 0.0001  | 49    | 0.0047                             | *                  | 0.0009                             | *                  |
| 0.0001  | 50    | 0.0042                             | *                  | 0.0008                             | *                  |
| 0.0001  | 51    | 0.0038                             | *                  | 0.0008                             | *                  |
| 0.0001  | 52    | 0.0034                             | *                  | 0.0007                             | *                  |
| 0.0001  | 53    | 0.0030                             | *                  | 0.0006                             | *                  |
| 0.0001  | 54    | 0.0025                             | *                  | 0.0005                             | *                  |
| 0.0001  | 55    | 0.0021                             | *                  | 0.0004                             | *                  |
| 0.0001  | 56    | 0.0017                             | *                  | 0.0003                             | *                  |
| 0.0001  | 57    | 0.0013                             | *                  | 0.0003                             | *                  |
| 0.0001  | 58    | 0.0008                             | *                  | 0.0002                             | *                  |
| 0.0001  | 59    | 0.0004                             | *                  | 0.0001                             | *                  |

<sup>A</sup> according to Thissen et al.<sup>26</sup>; <sup>B</sup> an asterisk (\*) indicates the statistically significant p-value after B-H correction



**Table S11.** A mosaic neurofibromatosis type-1 case (13.5-year-old girl presenting with >5 CALMs and skinfold freckling) with the *NFI* c.2540T>C (p.Leu847Pro) mutation found as the “second hit” in the cultured melanocytes from one CALM.

| Family ID                                                                              | Biopsy                      | Mutation                 |                                   |
|----------------------------------------------------------------------------------------|-----------------------------|--------------------------|-----------------------------------|
|                                                                                        |                             | “First hit” <sup>A</sup> | “Second hit”                      |
| UAB-R921FNES                                                                           | 1 <sup>st</sup> CALM biopsy |                          | <b>c.2540T&gt;C (p.Leu847Pro)</b> |
| * analysis performed on successfully cultured melanocytes from three biopsies of CALMs | 2 <sup>nd</sup> CALM biopsy | c.5547-1G>A              | absent                            |
|                                                                                        | 3 <sup>rd</sup> CALM biopsy |                          | c.1432A>G (p.Lys478Glu)           |

<sup>A</sup> mutation leads to out-of-frame skipping of exon 38 [29] during *NFI* mRNA splicing and out-of-frame skipping exons 38 and 39 [29 and 30] in a proportion of *NFI* mRNA transcripts; the c.5547-1G>A mutation was not found in the blood lymphocytes by next-generation sequencing (0/600 reads, 3 different amplicons)

## Supplemental References

1. Messiaen, L.M., Callens, T., Mortier, G., Beysen, D., Vandernroucke, I., Van Roy, N., Spelemen, F., Paepe, A.D. (2000). Exhaustive mutation analysis of the NF1 gene allows identification of 95% of mutations and reveals a high frequency of unusual splicing defects. *Hum. Mutat.* *15*, 541-555.
2. Messiaen, L.M., and Wimmer, K. (2012). Mutation analysis of the *NF1* gene by cDNA-based sequencing of the coding region. In *Advances in Neurofibromatosis Research*, K.S.G. Cunha and M. Geller, ed. (Nova Science Publishers, Inc.), pp. 89-108.
3. Richards, S., Aziz, N., Bale, S., Bick, D., Das, S., Gastier-Foster, J., Grody, W.W., Hedge, M., Lyon, E., Spector, E., et al. (2015). Standards and guidelines for the interpretation of sequence variants: a joint consensus recommendation of the American College of Medical Genetics and Genomics and the Association for Molecular Pathology. *Genet. Med.* *17*, 405-424.
4. Mattocks, C., Baralle, D., Tarpey, P., French-Constant, C., Bobrow, M., Whittaker, J. (2004). Automated comparative sequence analysis identifies mutations in 89% of NF1 patients and confirms a mutation cluster in exons 11-17 distinct from the GAP related domain. *J. Med. Genet.* *41*, e48.
5. van Minkelen, R., van Bever, Y., Kromosoeto, J.N., Withagen-Hermans, C.J., Nieuwlaat, A., Halley, D.J., van den Ouweland, A.M. (2014). A clinical and genetic overview of 18 years neurofibromatosis type 1 molecular diagnostics in the Netherlands. *Clin. Genet.* *85*, 318-327.
6. Sabbagh, A., Pasmant, E., Imbard, A., Luscan, A., Soares, M., Blanché, H., Laurendeau, I., Ferkal, S., Vidaud, M., Pinson, S. (2013). NF1 molecular characterization and neurofibromatosis type 1 genotype-phenotype correlation: the French experience. *Hum. Mutat.* *34*, 1510-1518.
7. Pasmant, E., Parfait, B., Luscan, A., Goussard, P., Briand-Suleau, A., Laurendeau, I., Fouveaut, C., Leroy, C., Montadert, A., Wolkenstein, P., et al. (2015). Neurofibromatosis type 1 molecular diagnosis: what can NGS do for you when you have a large gene with loss of function mutations? *Eur. J. Hum. Genet.* *23*, 596-601.
8. Maynard, J., Krawczak, M., Upadhyaya, M. (1997). Characterization and significance of nine novel mutations in exon 16 of the neurofibromatosis type 1 (NF1) gene. *Hum. Genet.* *99*, 674-676.
9. Kluwe, L., Tatagiba, M., Fünsterer, C., Mautner, V.F. (2003). NF1 mutations and clinical spectrum in patients with spinal neurofibromas. *J. Med. Genet.* *40*, 368-371.
10. Bongiorno, M.R., Cefalù, A.B., Aricò, M., Averna, M. (2008). Clinical, pathologic, and genetic features of massive soft tissue neurofibromas in a Sicilian patient. *Dermatol. Ther.* *3*, S21-S25.
11. Ars, E., Serra, E., Garcia, J., Kruyer, H., Gaona, A., Lázaro, C., Estivill X. (2000). Mutations affecting mRNA splicing are the most common molecular defects in patients with neurofibromatosis type 1. *Hum. Mol. Genet.* *9*, 237-247.
12. Ribeiro, M.J., Violante, I.R., Bernardino, I., Ramos, F., Saraiva, J., Reviriego, P., Upadhyaya, M., Silva, E.D., Castelo-Branco, M. (2012). Abnormal achromatic and chromatic contrast sensitivity in neurofibromatosis type 1. *Invest. Ophthalmol. Vis. Sci.* *53*, 287-293.
13. Zhou, X., Edmonson, M.N., Wilkinson, M.R., Patel, A., Wu, G., Liu, Y., Li, Y., Zhang, Z., Rusch, M.C., Parker, M., et al. (2016). Exploring genomic alteration in pediatric cancer using ProteinPaint. *Nat. Genet.* *48*, 4-6.

14. Bertola, D.R., Pereira, A.C., Passetti, F., de Oliveira, P.S., Messiaen, L., Gelb, B.D., Kim, C.A., Krieger, J.E. (2005). Neurofibromatosis-Noonan syndrome: molecular evidence of the concurrence of both disorders in a patient. *Am. J. Med. Genet. A.* *136A*, 242-245.
15. Cunha, K.S., Oliveira, N.S., Fausto, A.K., Cruz de Souza, C., Gros, A., Bandres, T., Idrissi, Y., Merlio, J-P., Soares de Moura Neto, R.S., Silva, R., et al. (2016). Hybridization capture-based next-generation sequencing to evaluate coding sequence and deep intronic mutations in the *NF1* gene. *Genes (Basel)* *7*, 133.
16. McPherson, J.R., Ong, C.K., Ng, C.C., Rajasegaran, V., Heng, H.L., Yu, W.S., Tan, B.K., Madhukumar, P., Teo, M.C., Ngeow, J. et al. (2015). Whole-exome sequencing of breast cancer, malignant peripheral nerve sheath tumor and neurofibroma from a patient with neurofibromatosis type 1. *Cancer Med.* *4*, 1871-1878.
17. Pascual-Castroviejo, I., Pascual-Pascual, S.I., Velazquez-Fragua, R., Botella, P., Viano, J. (2007). Familial spinal neurofibromatosis. *Neuropediatrics.* *38*, 105-108.
18. Burkitt Wright, E.M., Sach, E., Sharif, S., Quarrell, O., Carroll, T., Whitehouse, R.W., Upadhyaya, M., Huson, S.M., Evans, D.G.R. (2013). Can the diagnosis of NF1 be excluded clinically? A lack of pigmentary findings in families with spinal neurofibromatosis demonstrates a limitation of clinical diagnosis. *J. Med. Genet.* *50*, 606–613.
19. Girodon-Boulandet, E., Pantel, J., Cazeneuve, C., Gijn, M.V., Vidaud, D., Lemay, S., Martin, J., Zeller, J., Revuz, J., Goossens, M., et al. (2000). NF1 gene analysis focused on CpG-rich exons in a cohort of 93 patients with neurofibromatosis type 1. *Hum. Mutat.* *16*, 274-275.
20. Wang, Q., Montmain, G., Ruano, E., Upadhyaya, M., Dudley, S., Liskay, R.M., Thibodeau, S.N., Puisieux, A. (2003). Neurofibromatosis type 1 gene as a mutational target in a mismatch repair-deficient cell type. *Hum. Genet.* *112*, 117-123.
21. Fahsold, R., Hoffmeyer, S., Mischung, C., Gille, C., Ehlers, C., Kücükcayan, N., Abdel-Nour, M., Gewies, A., Peters, H., Kaufmann, D., et al. (2000). Minor lesion mutational spectrum of the entire NF1 gene does not explain its high mutability but points to a functional domain upstream of the GAP-related domain. *Am. J. Hum. Genet.* *66*, 790-818.
22. De Luca, A., Buccino, A., Gianni, D., Mangino, M., Giustini, S., Richetta, A., Divona, L., Calvieri, S., Mingarelli, R., Dallapiccola, B. (2003). NF1 gene analysis based on DHPLC. *Hum. Mutat.* *21*, 171-172.
23. De Luca, A., Schirinzi, A., Buccino, A., Bottillo, I., Sinibaldi, L., Torrente, I., Ciavarella, A., Dottorini, T., Porciello, R., Giustini, S., et al. (2004). Novel and recurrent mutations in the NF1 gene in Italian patients with neurofibromatosis type 1. *Hum. Mutat.* *23*, 629.
24. Li, K., Turner, A.N., Chen, M., Brosius, S.N., Schoeb, T.R., Messiaen, L.M., Bedwell, D.M., Zinn, K.R., Anastasaki, C., Gutmann, D.H., et al. (2016). Mice with missense and nonsense NF1 mutations display divergent phenotypes compared with human neurofibromatosis type 1. *Dis. Model. Mech.* *9*, 759-767.
25. Toonen, J.A., Anastasaki, C., Smithson, L.J., Gianino, S.M., Li, K., Kesterson, R.A., Gutmann, D.H. (2016). NF1 germline mutation differentially dictates optic glioma formation and growth in neurofibromatosis-1. *Hum. Mol. Genet.* *25*, 1703-1713.
26. Thissen, D., Steinberg, L., Kuang, D. (2002). Quick and easy implementation of the Benjamini-Hochberg procedure for controlling the false positive rate in multiple comparisons. *J. Educ. Behav. Stat.* *27*, 77-83.
