# Supplementary material for: Genotype-Phenotype Correlation in NF1: Evidence for a More Severe Phenotype Associated with Missense Mutations Affecting NF1 Codons 844–848
Source: PubMed Central journal article supplement — Am J Hum Genet. 2017 Dec 28;102(1):69–87. doi: 10.1016/j.ajhg.2017.12.001 (PMC5777934; doi:10.1016/j.ajhg.2017.12.001), 2017-12-28
Supplement: mmc3.pdf [file mmc3.pdf]

# Genotype-Phenotype Correlation in NF1: Evidence for a More Severe Phenotype Associated with Missense Mutations Affecting *NF1* Codons 844–848

Magdalena Koczkowska,<sup>1</sup> Yunjia Chen,<sup>1</sup> Tom Callens,<sup>1</sup> Alicia Gomes,<sup>1</sup> Angela Sharp,<sup>1</sup> Sherrell Johnson,<sup>1</sup> Meng-Chang Hsiao,<sup>1</sup> Zhenbin Chen,<sup>1</sup> Meena Balasubramanian,<sup>2</sup> Christopher P. Barnett,<sup>3</sup> Troy A. Becker,<sup>4</sup> Shay Ben-Shachar,<sup>5</sup> Debora R. Bertola,<sup>6</sup> Jaishri O. Blakeley,<sup>7</sup> Emma M.M. Burkitt-Wright,<sup>8</sup> Alison Callaway,<sup>9</sup> Melissa Crenshaw,<sup>4</sup> Karin S. Cunha,<sup>10</sup> Mitch Cunningham,<sup>11</sup> Maria D. D'Agostino,<sup>12</sup> Karin Dahan,<sup>13</sup> Alessandro De Luca,<sup>14</sup> Anne Destrée,<sup>13</sup> Radhika Dhamija,<sup>15</sup> Marica Eoli,<sup>16</sup> D. Gareth R. Evans,<sup>8</sup> Patricia Galvin-Parton,<sup>17</sup> Jaya K. George-Abraham,<sup>18</sup> Karen W. Gripp,<sup>19</sup> Jose Guevara-Campos,<sup>20</sup> Neil A. Hanchard,<sup>21</sup> Concepcion Hernández-Chico,<sup>22</sup> LaDonna Immken,<sup>18</sup> Sandra Janssens,<sup>23</sup> Kristi J. Jones,<sup>24</sup>

(Author list continued on next page)

Neurofibromatosis type 1 (NF1), a common genetic disorder with a birth incidence of 1:2,000–3,000, is characterized by a highly variable clinical presentation. To date, only two clinically relevant intragenic genotype-phenotype correlations have been reported for *NF1* missense mutations affecting p.Arg1809 and a single amino acid deletion p.Met922del. Both variants predispose to a distinct mild NF1 phenotype with neither externally visible cutaneous/plexiform neurofibromas nor other tumors. Here, we report 162 individuals (129 unrelated probands and 33 affected relatives) heterozygous for a constitutional missense mutation affecting one of five neighboring *NF1* codons—Leu844, Cys845, Ala846, Leu847, and Gly848—located in the cysteine-serine-rich domain (CSRD). Collectively, these recurrent missense mutations affect ~0.8% of unrelated *NF1* mutation-positive probands in the University of Alabama at Birmingham (UAB) cohort. Major superficial plexiform neurofibromas and symptomatic spinal neurofibromas were more prevalent in these individuals compared with classic NF1-affected cohorts (both  $p < 0.0001$ ). Nearly half of the individuals had symptomatic or asymptomatic optic pathway gliomas and/or skeletal abnormalities. Additionally, variants in this region seem to confer a high predisposition to develop malignancies compared with the general NF1-affected population ( $p = 0.0061$ ). Our results demonstrate that these *NF1* missense mutations, although located outside the GAP-related domain, may be an important risk factor for a severe presentation. A genotype-phenotype correlation at the *NF1* region 844–848 exists and will be valuable in the management and genetic counseling of a significant number of individuals.

## Introduction

Neurofibromatosis type 1 (NF1 [MIM: 162200]), one of the most common genetic disorders with a birth incidence of 1 in 2,000–3,000,<sup>1–3</sup> is characterized by a highly variable

inter- and intrafamilial expressivity (see GeneReviews in [Web Resources](#)). It is caused by loss-of-function genetic variants in *NF1* (MIM: 613113), located on chromosome 17q11.2. *NF1* encodes neurofibromin, a GTPase activating protein (GAP) that downregulates the RAS signal

<sup>1</sup>Department of Genetics, University of Alabama at Birmingham, Birmingham, AL 35294, USA; <sup>2</sup>Sheffield Clinical Genetics Service, Sheffield Children's NHS Foundation Trust, Sheffield S10 2TH, UK; <sup>3</sup>Women's and Children's Hospital/SA Pathology, North Adelaide, SA 5006, Australia; <sup>4</sup>Medical Genetics, Johns Hopkins All Children's Hospital, St. Petersburg, FL 33701, USA; <sup>5</sup>The Genetic Institute, Tel-Aviv Sourasky Medical Center and Sackler Faculty of Medicine, Tel-Aviv 6997801, Israel; <sup>6</sup>Department of Pediatrics, University of São Paulo, São Paulo 05403-000, Brazil; <sup>7</sup>Department of Neurology, Johns Hopkins University School of Medicine, Baltimore, MD 21287, USA; <sup>8</sup>Genomic Medicine, Division of Evolution and Genomic Sciences, Manchester Academic Health Sciences Centre, University of Manchester, Central Manchester University Hospitals NHS Foundation Trust, Manchester M13 9WL, UK; <sup>9</sup>Wessex Regional Genetics Laboratory, Salisbury NHS Foundation Trust, Salisbury SP2 8BJ, UK; <sup>10</sup>Department of Pathology, School of Medicine, Universidade Federal Fluminense, Niterói 24220-900, Brazil; <sup>11</sup>Division of Genetic, Genomic and Metabolic Disorders, Children's Hospital of Michigan, Detroit Medical Center, Detroit, MI 48201, USA; <sup>12</sup>Department of Medical Genetics, McGill University Health Centre, Montréal, QC H4A 3J1, Canada; <sup>13</sup>Center for Human Genetics, Institute of Pathology and Genetics (IPG), Gosselies 6041, Belgium; <sup>14</sup>Molecular Genetics Unit, Casa Sollievo della Sofferenza Hospital, IRCCS, San Giovanni Rotondo 71013, Italy; <sup>15</sup>Department of Clinical Genomics and Neurology, Mayo Clinic, Phoenix, AZ 85259, USA; <sup>16</sup>Unit of Molecular Neuro-Oncology, IRCCS Foundation, Carlo Besta Neurological Institute, Milan 20133, Italy; <sup>17</sup>Department of Genetics, Stony Brook Children's, Stony Brook, NY 11794, USA; <sup>18</sup>Dell Children's Medical Center of Central Texas, Austin, TX 78723, USA; <sup>19</sup>Division of Medical Genetics, Al DuPont Hospital for Children, Wilmington, DE 19803, USA; <sup>20</sup>Pediatrics Service, Felipe Guevara Rojas Hospital, University of Oriente, El Tigre-Anzoátegui, Venezuela 6034, Spain; <sup>21</sup>Department of Molecular and Human Genetics, Baylor College of Medicine, Houston, TX 77030, USA; <sup>22</sup>Department of Genetics, Hospital Universitario Ramón y Cajal, Institute of Health Research (IRYCIS), Madrid 28034, Spain and Center for Biomedical Research-Network of Rare Diseases (CIBERER); <sup>23</sup>Center for Medical Genetics, Ghent University Hospital, Ghent 9000, Belgium; <sup>24</sup>Department of Clinical Genetics, the Children's Hospital at Westmead, Westmead, NSW 2145, Australia; <sup>25</sup>Division of Human Genetics, Children's Hospital of Philadelphia, University of Pennsylvania School of Medicine, Philadelphia, PA 19104, USA; <sup>26</sup>Department of Genetics, Valley Children's Healthcare, Madera, CA 93636, USA; <sup>27</sup>Division of Clinical Genetics, Center for Genomic Medicine, Miami Cancer Institute, Miami, FL 33176, USA; <sup>28</sup>Department of Genetics, Yale University, New Haven, CT 06520, USA; <sup>29</sup>St George's University Hospitals NHS Foundation Trust, London SW17 0QT, UK; <sup>30</sup>Genomics Medicine Program, Children's Hospital Minnesota, Minneapolis, MN

(Affiliations continued on next page)

© 2017 The Authors. This is an open access article under the CC BY-NC-ND license (<http://creativecommons.org/licenses/by-nc-nd/4.0/>).

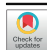

Beth A. Keena,<sup>25</sup> Aaina Kochhar,<sup>26</sup> Jan Liebelt,<sup>3</sup> Arelis Martir-Negron,<sup>27</sup> Maurice J. Mahoney,<sup>28</sup> Isabelle Maystadt,<sup>13</sup> Carey McDougall,<sup>25</sup> Meriel McEntagart,<sup>29</sup> Nancy Mendelsohn,<sup>30</sup> David T. Miller,<sup>31</sup> Geert Mortier,<sup>32</sup> Jenny Morton,<sup>33</sup> John Pappas,<sup>34</sup> Scott R. Plotkin,<sup>35</sup> Dinel Pond,<sup>30</sup> Kenneth Rosenbaum,<sup>36</sup> Karol Rubin,<sup>37</sup> Laura Russell,<sup>12</sup> Lane S. Rutledge,<sup>1</sup> Veronica Saletti,<sup>38</sup> Rhonda Schonberg,<sup>36</sup> Allison Schreiber,<sup>39</sup> Meredith Seidel,<sup>35</sup> Elizabeth Siqveland,<sup>30</sup> David W. Stockton,<sup>11</sup> Eva Trevisson,<sup>40</sup> Nicole J. Ullrich,<sup>41</sup> Meena Upadhyaya,<sup>42</sup> Rick van Minkelen,<sup>43</sup> Helene Verhelst,<sup>44</sup> Margaret R. Wallace,<sup>45</sup> Yoon-Sim Yap,<sup>46,47</sup> Elaine Zackai,<sup>25</sup> Jonathan Zonana,<sup>48</sup> Vickie Zurcher,<sup>39</sup> Kathleen Claes,<sup>23</sup> Yolanda Martin,<sup>22</sup> Bruce R. Korf,<sup>1,50</sup> Eric Legius,<sup>49</sup> and Ludwine M. Messiaen<sup>1,\*</sup>

transduction pathway through its GAP-related domain (GRD).<sup>4,5</sup> The most common first signs of NF1 are multiple café-au-lait macules (CALMs) in >95% of infants and skinfold freckling in >80% of children by the age of 7 years.<sup>6</sup> Other clinical features observed in >90% of adults with NF1 are iris Lisch nodules and cutaneous neurofibromas.<sup>7</sup> Individuals with a more severe phenotype present with plexiform and/or spinal neurofibromas, symptomatic optic pathway gliomas (OPGs), as well as specific osseous lesions, such as sphenoid wing or tibial dysplasia. Approximately 50% of NF1-affected case subjects have *de novo* mutations, while the remaining individuals inherit the disorder from an affected parent (see GeneReviews in [Web Resources](#)). According to the National Institutes of Health (NIH) diagnostic criteria, at least two of the aforementioned features are required to classify a person as having the clinical diagnosis of NF1.<sup>8</sup>

Due to the variability in clinical presentation, age dependency of most manifestations, the timing and number of second hits in specific cells, and the wide *NF1* allelic heterogeneity, identification of specific genotype-phenotype correlations is extremely challenging. To date, more than 2,800 *different* germline *NF1* pathogenic variants have been identified in the University of Alabama at Birmingham (UAB) cohort, with only 31 unique pathogenic variants present in  $\geq 0.5\%$  of all unrelated individuals (L.M.M., unpublished data). Moreover, a mild NF1 phenotype, including only CALMs and skinfold freckles, overlaps with Legius syndrome (MIM: 611431), caused by mutations in *SPRED1* (MIM: 609291).<sup>9,10</sup>

So far, only three clinically significant genotype-phenotype correlations have been reported. First, individuals with a constitutional *NF1* microdeletion usually show a

more severe phenotype compared to the general NF1-affected population. The *NF1* microdeletion syndrome (MIM: 613675) is typically characterized by a large number of neurofibromas at a young age, dysmorphic facial features (hypertelorism, downslanted palpebral fissures, broad nasal bridge, low-set ears, micrognathia, coarse face, facial asymmetry), and developmental delay and/or intellectual disability. Individuals may present with cardiac defects as well as growth and skeletal abnormalities. *NF1* microdeletions have been associated with an increased lifetime risk for malignant peripheral nerve sheath tumors (MPNSTs). The constitutional co-deletion of *SUZ12* (MIM: 606245) within the common *NF1*-microdeletion region is thought to be a risk factor for the malignant neoplasms.<sup>11</sup> Second, individuals with a specific single amino acid *NF1* deletion (c.2970\_2972del [p.Met992del]) present with a milder phenotype. These individuals have multiple CALMs with or without freckles, but no externally visible cutaneous or plexiform neurofibromas.<sup>12</sup> A third genotype-phenotype correlation involving *NF1* missense mutations affecting arginine at position 1809 is also associated with a distinct presentation,<sup>13,14</sup> including developmental delay and/or learning disabilities, pulmonic stenosis, and Noonan-like features, but no external plexiform neurofibromas or symptomatic OPGs. Both of these affected amino acids reside outside the GRD domain.

Another distinct form of NF1 is familial spinal neurofibromatosis (FSNF [MIM: 162210]) originally described by Pulst et al.<sup>15</sup> in six affected members from two unrelated families. It is characterized by bilateral and histologically proven neurofibromas of all spinal dorsal roots with a paucity or absolute lack of cutaneous manifestations.<sup>16,17</sup> So far, only ~100 individuals (both familial and sporadic)

55404, USA; <sup>31</sup>Multidisciplinary Neurofibromatosis Program, Boston Children's Hospital, Boston, MA 02115, USA; <sup>32</sup>Department of Medical Genetics, University of Antwerp and Antwerp University Hospital, Antwerp 2650, Belgium; <sup>33</sup>Birmingham Women's and Children's NHS Foundation Trust, Birmingham B15 2TG, UK; <sup>34</sup>Department of Pediatrics, Clinical Genetic Services, NYU School of Medicine, New York, NY 10016, USA; <sup>35</sup>Department of Neurology and Cancer Center, Massachusetts General Hospital, Boston, MA 02114, USA; <sup>36</sup>Division of Genetics and Metabolism, Children's National Health System, Washington, DC 20010, USA; <sup>37</sup>University of Minnesota Health, Minneapolis, MN 55404, USA; <sup>38</sup>Developmental Neurology Unit, IRCCS Foundation, Carlo Besta Neurological Institute, Milan 20133, Italy; <sup>39</sup>Genomic Medicine Institute, Cleveland Clinic, Cleveland, OH 44195, USA; <sup>40</sup>Clinical Genetics Unit, Department of Women's and Children's Health, University of Padova, Padova, Italy and Italy Istituto di Ricerca Pediatrica, IRP, Città della Speranza, Padova 35128, Italy; <sup>41</sup>Department of Neurology, Boston Children's Hospital, Boston, MA 02115, USA; <sup>42</sup>Division of Cancer and Genetics, Cardiff University, Cardiff CF14 4XN, UK; <sup>43</sup>Department of Clinical Genetics, Erasmus Medical Center, Rotterdam 3015 GE, the Netherlands; <sup>44</sup>Department of Paediatrics, Division of Paediatric Neurology, Ghent University Hospital, Ghent 9000, Belgium; <sup>45</sup>Department of Molecular Genetics & Microbiology, University of Florida College of Medicine, Gainesville, FL 32610, USA; <sup>46</sup>Division of Medical Oncology, National Cancer Centre Singapore, Singapore 169610, Singapore; <sup>47</sup>Faculty of Health Sciences, School of Medicine, University of Adelaide, Adelaide, SA 5000, Australia; <sup>48</sup>Department of Molecular and Medical Genetics, Oregon Health and Science University, Portland, OR 97239, USA; <sup>49</sup>Department of Human Genetics, KU Leuven - University of Leuven, Leuven 3000, Belgium

<sup>50</sup>All editorial responsibility for this paper was handled by an associate editor of *The Journal*

\*Correspondence: [lmessiaen@uabmc.edu](mailto:lmessiaen@uabmc.edu)

<https://doi.org/10.1016/j.ajhg.2017.12.001>.

have been reported with this form.<sup>17</sup> It has been suggested that individuals with the severe subtype of FSNF more frequently carry an *NF1* missense or splicing mutation.<sup>18–20</sup> Of particular interest are two families: a two-generation family with three first-degree relatives reported by Pascual-Castroviejo et al.<sup>21</sup> and a three-generation family with three first-degree relatives reported by Burkitt-Wright et al.<sup>16</sup> Specific *NF1* missense mutations c.2542G>C (p.Gly848Arg) and c.2543G>A (p.Gly848Glu), located in the cysteine-serine-rich domain (CSRD), were present in all individuals affected by multiple spinal dorsal root neurofibromas. Despite the evidence that c.2542G>C (p.Gly848Arg) is a clearly pathogenic mutation, two recent studies using mouse models did not recapitulate the phenotype identified in humans.<sup>22,23</sup> Genetically engineered mice with c.2542G>C (p.Gly848Arg) mutation developed neither OPGs nor plexiform neurofibromas, demonstrating phenotypic divergence between NF1-affected individuals and mice.<sup>22,23</sup>

In this study, we report a cohort of 129 unrelated probands and 33 affected relatives heterozygous for a constitutional missense mutation affecting one of five neighboring *NF1* codons—Leu844, Cys845, Ala846, Leu847, and Gly848. These individuals have a high prevalence of a severe phenotype, including plexiform and symptomatic spinal neurofibromas, symptomatic optic pathway gliomas, other malignant neoplasms, and bone abnormalities. The current findings clearly demonstrate that missense mutations outside the GRD are not solely associated with a mild phenotype.

## Material and Methods

### Individuals and Phenotypic Data

A total of 162 individuals heterozygous for a missense mutation affecting one of five neighboring *NF1* codons (Leu844, Cys845, Ala846, Leu847, and Gly848) were included in the study. Blood samples from 78 individuals (67 probands and 11 relatives) were originally sent to the UAB Medical Genomics Laboratory for molecular *NF1* genetic testing to establish or confirm the diagnosis for NF1. This initial study was expanded to include an additional 84 individuals (62 probands and 22 relatives), molecularly diagnosed in collaborating institutions (as detailed in Table S1).

All individuals included in this study were clinically assessed using the standardized phenotypic checklist form as previously reported (Figure S1).<sup>14</sup> The clinical data were collected at the time of mutation analysis and re-verified for accuracy by referring physicians co-authoring this paper at the time of this study. Additionally, referring physicians updated the phenotypic data at the time of this genotype-phenotype study, when available, i.e., when the individual had been seen and followed at their institution after genetic testing results were reported. The phenotypic data and age provided correspond to the latest clinical evaluation. The phenotypic checklist form consists of two parts: (1) general information including gender, date of birth, ethnicity, height, head circumference (HC), weight, fulfillment of the NIH diagnostic criteria, and mode of inheritance and (2) NF1 signs and symptoms, including CALMs, skinfold freck-

ling, Lisch nodules, cutaneous and subcutaneous, plexiform and spinal neurofibromas, OPGs and other neoplasms, skeletal and cardiac abnormalities, development and education levels, presence/absence of Noonan syndrome features, and segmental phenotype.

Fifteen major clinical features of NF1 were selected for the genotype-phenotype correlation study (Tables 1, 2, and 3). Individuals with missing data for a particular sign and/or symptom were classified as “unknown” or “not specified” and consequently excluded from that part of the genotype-phenotype analysis. Most features were identified by physical examination; ophthalmologic examination for Lisch nodules and imaging to detect asymptomatic OPGs and spinal neurofibromas was not performed in most individuals. Brain and spine/whole-body MRI was done mainly in individuals with signs and/or symptoms indicative of OPGs or internal/spinal neurofibromas; however, depending on institutional policies, some individuals were screened by MRI despite the absence of symptoms. Noonan phenotype was diagnosed if at least two of the following features were observed: short stature, hypertelorism, low-set ears, webbed neck, ptosis, midface hypoplasia, or pulmonic stenosis. To evaluate short stature and macrocephaly, the World Health Organization (WHO) and the Center for Disease Control (CDC) growth charts and the Gerhard Nellhaus’ curve<sup>24</sup> were used as previously described.<sup>14</sup> Short stature and macrocephaly were defined as height below or equal to the 3rd percentile ( $PC \leq 3$ ) and as head circumference equal or above the 98th percentile ( $PC \geq 98$ ), respectively. For cognitive impairment/learning disabilities, individuals with attention deficit disorder (ADD) and/or attention deficit hyperactivity disorder (ADHD) but normal development were classified as normal.

To establish a genotype-phenotype association, we used the same approach as previously described.<sup>14</sup> We compared the phenotypes of individuals with missense mutations affecting codons 844–848 with the cohort of 169 individuals with missense mutations affecting p.Arg1809,<sup>13,14,25–27</sup> 47 individuals heterozygous for c.2970\_2972del (p.Met992del) mutations,<sup>12</sup> and previously described large-scale NF1-affected individual cohorts with “classic” NF1.<sup>7,28–40</sup>

This study was approved by the Institutional Review Boards of all participating institutions offering clinical genetic testing.

### Molecular Analysis

In the Medical Genomics Laboratory at UAB, comprehensive *NF1* mutation screening using an RNA-based approach complemented by DNA-dosage analysis was performed as previously described.<sup>41,42</sup> The status of the specific familial mutation in relatives was ascertained by bidirectional Sanger sequencing (ABI PRISM 3730, Life Technologies).

The nomenclature of the mutations is based on *NF1* mRNA sequence GenBank: NM\_000267.3 according to the recommendations of the Human Genome Variation Society (HGVS). For exon numbering we used the NCBI numbering, followed by the historical numbering in square brackets originally developed by the NF1 community.<sup>42</sup>

### In Silico Prediction of Effect of Missense Mutations

Eight software programs were used to predict the effects of missense variants: two online *in silico* prediction tools (CADD v.1.3 and PolyPhen-2) and six complementary tools (Grantham Difference, SIFT v.4.0.3, SpliceSiteFinder-like, MaxEntScan, NNSplice v.0.9, and Human Splicing Finder v.2.4.1) embedded

**Table 1. Demographic and Clinical Characterization of Individuals with a Missense Mutation Affecting Codons 844–848**

| Mutation<br>[Proband:Relative]                                                     | Codon 844                                                                                                                                        |      |       | Codon 845                                                             |       |       | Codon 846                                                             |      |       | Codon 847                                                               |       |       | Codon 848                                                                                                   |       |       | All Codons 844–848 | Total |       |          |
|------------------------------------------------------------------------------------|--------------------------------------------------------------------------------------------------------------------------------------------------|------|-------|-----------------------------------------------------------------------|-------|-------|-----------------------------------------------------------------------|------|-------|-------------------------------------------------------------------------|-------|-------|-------------------------------------------------------------------------------------------------------------|-------|-------|--------------------|-------|-------|----------|
|                                                                                    | c.2530C>T<br>(p.Leu844Phe)<br>[10:1]; c.2531T>A<br>(p.Leu844His) [2:0];<br>c.2531T>C<br>(p.Leu844Pro)<br>[7:0]; c.2531T>G<br>(p.Leu844Arg) [6:0] |      |       | c.2533T>C<br>(p.Cys845Arg)<br>[3:1]; c.2534G>A<br>(p.Cys845Tyr) [8:0] |       |       | c.2536G>C<br>(p.Ala846Pro)<br>[1:2]; c.2537C>A<br>(p.Ala846Asp) [5:2] |      |       | c.2540T>C<br>(p.Leu847Pro)<br>[58:12]; c.2540T>G<br>(p.Leu847Arg) [8:0] |       |       | c.2542G>A<br>(p.Gly848Arg)<br>[6:0]; c.2542G>C<br>(p.Gly848Arg)<br>[8:11]; c.2543G>A<br>(p.Gly848Glu) [7:4] |       |       |                    |       |       |          |
| Mutation-positive individuals<br>[Proband:Relative]                                | 26 [25:1]                                                                                                                                        |      |       | 12 [11:1]                                                             |       |       | 10 [6:4]                                                              |      |       | 78 [66:12]                                                              |       |       | 36 [21:15]                                                                                                  |       |       | 162 [129:33]       |       |       |          |
| Age group, years                                                                   | ≤8                                                                                                                                               | 9–18 | ≥19   | ≤8                                                                    | 9–18  | ≥19   | ≤8                                                                    | 9–18 | ≥19   | ≤8                                                                      | 9–18  | ≥19   | ≤8                                                                                                          | 9–18  | ≥19   | ≤8                 | 9–18  | ≥19   | all ages |
| Total                                                                              | 12                                                                                                                                               | 5    | 9     | 4                                                                     | 2     | 6     | 3                                                                     | 1    | 6     | 28                                                                      | 14    | 36    | 13                                                                                                          | 5     | 18    | 60                 | 27    | 75    | 162      |
| Proband:Relative                                                                   | 12:0                                                                                                                                             | 5:0  | 8:1   | 4:0                                                                   | 2:0   | 5:1   | 2:1                                                                   | 1:0  | 3:3   | 27:1                                                                    | 12:2  | 27:9  | 6:7                                                                                                         | 4:1   | 11:7  | 51:9               | 24:3  | 54:21 | 129:33   |
| Age range, years                                                                   | 1–8                                                                                                                                              | 9–16 | 24–55 | 1–2                                                                   | 15–16 | 19–48 | 4–5                                                                   | 18   | 33–69 | 1–8                                                                     | 9–18  | 19–72 | 1–7                                                                                                         | 10–17 | 19–74 | 1–8                | 9–18  | 19–74 | 1–74     |
| Male: Female                                                                       | 6:6                                                                                                                                              | 4:1  | 1:8   | 1:3                                                                   | 1:1   | 1:5   | 2:1                                                                   | 0:1  | 1:5   | 10:18                                                                   | 5:9   | 19:17 | 9:4                                                                                                         | 2:3   | 5:13  | 28:32              | 12:15 | 27:48 | 67:95    |
| Fulfilling the NIH criteria<br>if the family history is<br>taken into account      | 10/11                                                                                                                                            | 4/5  | 9/9   | 2/4                                                                   | 1/2   | 4/5   | 3/3                                                                   | 1/1  | 6/6   | 17/28                                                                   | 14/14 | 35/36 | 4/11                                                                                                        | 4/5   | 17/18 | 36/57              | 24/27 | 71/74 | 131/158  |
| Fulfilling the NIH criteria<br>if solely taking the physical<br>signs into account | 10/11                                                                                                                                            | 4/5  | 9/9   | 2/4                                                                   | 1/2   | 4/5   | 2/3                                                                   | 1/1  | 6/6   | 17/28                                                                   | 14/14 | 33/36 | 4/11                                                                                                        | 4/5   | 13/18 | 35/57              | 24/27 | 65/74 | 124/158  |
| >5 CALMs                                                                           | 12/12                                                                                                                                            | 5/5  | 8/8   | 4/4                                                                   | 1/2   | 4/5   | 3/3                                                                   | 1/1  | 4/6   | 27/28                                                                   | 14/14 | 32/35 | 5/11                                                                                                        | 3/5   | 7/18  | 51/58              | 24/27 | 55/72 | 130/157  |
| Freckling                                                                          | 10/10                                                                                                                                            | 4/5  | 6/7   | 0/4                                                                   | 1/2   | 4/5   | 2/2                                                                   | 1/1  | 5/5   | 12/23                                                                   | 13/13 | 31/34 | 4/10                                                                                                        | 3/5   | 8/18  | 28/49              | 22/26 | 54/69 | 104/144  |
| Lisch nodules                                                                      | 2/9                                                                                                                                              | 1/4  | 4/4   | 0/1                                                                   | 0/0   | 1/2   | 0/1                                                                   | 0/1  | 2/2   | 4/19                                                                    | 3/9   | 17/19 | 2/8                                                                                                         | 0/5   | 6/14  | 8/38               | 4/19  | 30/41 | 42/98    |
| Skeletal abnormalities <sup>a</sup>                                                | 2/11                                                                                                                                             | 2/5  | 5/9   | 2/4                                                                   | 1/2   | 2/4   | 0/2                                                                   | 0/1  | 0/5   | 3/25                                                                    | 3/14  | 17/28 | 3/11                                                                                                        | 3/5   | 5/18  | 10/53              | 9/27  | 29/64 | 48/144   |
| Plexiform neurofibromas                                                            | 0/11                                                                                                                                             | 2/5  | 3/9   | 0/3                                                                   | 2/2   | 2/5   | 0/2                                                                   | 1/1  | 1/2   | 6/24                                                                    | 3/13  | 19/33 | 0/11                                                                                                        | 1/5   | 7/17  | 6/51               | 9/26  | 32/66 | 47/143   |
| Cutaneous neurofibromas <sup>b</sup>                                               | 1/11                                                                                                                                             | 1/5  | 7/9   | 0/4                                                                   | 0/2   | 3/4   | 0/2                                                                   | 1/1  | 4/5   | 1/26                                                                    | 4/14  | 28/33 | 1/11                                                                                                        | 1/5   | 5/18  | 3/54               | 7/27  | 47/69 | 57/150   |
| Subcutaneous<br>neurofibromas <sup>b</sup>                                         | 1/9                                                                                                                                              | 0/5  | 6/8   | 1/4                                                                   | 0/2   | 1/4   | 0/2                                                                   | 0/0  | 3/5   | 1/26                                                                    | 4/13  | 17/30 | 1/11                                                                                                        | 0/5   | 6/18  | 4/52               | 4/25  | 33/65 | 41/142   |
| Cutaneous and<br>subcutaneous <sup>b</sup>                                         | 0/9                                                                                                                                              | 0/5  | 5/8   | 0/4                                                                   | 0/2   | 1/3   | 0/2                                                                   | 0/0  | 3/5   | 0/25                                                                    | 1/13  | 17/30 | 0/11                                                                                                        | 0/5   | 4/18  | 0/51               | 1/25  | 30/64 | 31/140   |
| Symptomatic spinal<br>neurofibromas                                                | 0/10                                                                                                                                             | 0/3  | 0/8   | 0/2                                                                   | 1/2   | 0/4   | 0/2                                                                   | 0/0  | 0/2   | 1/23                                                                    | 1/13  | 2/27  | 0/11                                                                                                        | 1/4   | 7/16  | 1/48               | 3/22  | 9/57  | 13/127   |
| Spinal neurofibromas<br>by MRI <sup>c</sup>                                        | 0/1                                                                                                                                              | 0/0  | 0/5   | 0/0                                                                   | 1/2   | 1/1   | 0/1                                                                   | 0/0  | 0/1   | 1/5                                                                     | 2/6   | 3/16  | 0/1                                                                                                         | 2/3   | 10/11 | 1/8                | 5/11  | 14/34 | 20/53    |

(Continued on next page)

**Table 1. Continued**

| Mutation<br>[Proband:Relative]                       | Codon 844                                                                                                                                        |     |     | Codon 845                                                             |     |     | Codon 846                                                             |     |     | Codon 847                                                               |      |       | Codon 848                                                                                                   |     |      | All Codons 844–848 | Total |       |        |
|------------------------------------------------------|--------------------------------------------------------------------------------------------------------------------------------------------------|-----|-----|-----------------------------------------------------------------------|-----|-----|-----------------------------------------------------------------------|-----|-----|-------------------------------------------------------------------------|------|-------|-------------------------------------------------------------------------------------------------------------|-----|------|--------------------|-------|-------|--------|
|                                                      | c.2530C>T<br>(p.Leu844Phe)<br>[10:1]; c.2531T>A<br>(p.Leu844His) [2:0];<br>c.2531T>C<br>(p.Leu844Pro)<br>[7:0]; c.2531T>G<br>(p.Leu844Arg) [6:0] |     |     | c.2533T>C<br>(p.Cys845Arg)<br>[3:1]; c.2534G>A<br>(p.Cys845Tyr) [8:0] |     |     | c.2536G>C<br>(p.Ala846Pro)<br>[1:2]; c.2537C>A<br>(p.Ala846Asp) [5:2] |     |     | c.2540T>C<br>(p.Leu847Pro)<br>[58:12]; c.2540T>G<br>(p.Leu847Arg) [8:0] |      |       | c.2542G>A<br>(p.Gly848Arg)<br>[6:0]; c.2542G>C<br>(p.Gly848Arg)<br>[8:11]; c.2543G>A<br>(p.Gly848Glu) [7:4] |     |      |                    |       |       |        |
| Symptomatic OPGs <sup>d</sup>                        | 1/11                                                                                                                                             | 1/5 | 0/9 | 0/3                                                                   | 0/2 | 0/5 | 1/3                                                                   | 1/1 | 0/3 | 2/25                                                                    | 1/13 | 2/27  | 1/11                                                                                                        | 1/5 | 1/13 | 5/53               | 4/26  | 3/57  | 12/136 |
| Asymptomatic OPGs <sup>e</sup>                       | 2/6                                                                                                                                              | 1/2 | 2/4 | 0/1                                                                   | 0/2 | 0/2 | 0/1                                                                   | 0/0 | 0/3 | 1/8                                                                     | 6/9  | 4/13  | 1/4                                                                                                         | 0/2 | 1/6  | 4/20               | 7/15  | 7/28  | 18/63  |
| Other neoplasms <sup>f</sup>                         | 1/11                                                                                                                                             | 0/4 | 1/8 | 0/2                                                                   | 0/1 | 0/4 | 0/2                                                                   | 0/1 | 0/3 | 1/24                                                                    | 3/14 | 11/34 | 2/11                                                                                                        | 1/5 | 1/15 | 4/50               | 4/25  | 13/64 | 21/139 |
| Cognitive impairment<br>and/or learning disabilities | 3/11                                                                                                                                             | 3/4 | 0/6 | 1/4                                                                   | 0/2 | 3/4 | 3/3                                                                   | 0/1 | 1/5 | 10/26                                                                   | 7/13 | 12/26 | 5/11                                                                                                        | 5/5 | 3/17 | 22/55              | 15/25 | 19/58 | 56/138 |
| Noonan syndrome features                             | 0/9                                                                                                                                              | 1/5 | 1/8 | 0/2                                                                   | 1/1 | 0/4 | 0/2                                                                   | 0/1 | 0/4 | 3/27                                                                    | 0/13 | 3/26  | 1/10                                                                                                        | 0/5 | 0/17 | 4/50               | 2/25  | 4/59  | 10/134 |
| Short stature <sup>g</sup>                           | 1/7                                                                                                                                              | 0/2 | 0/4 | 0/3                                                                   | 1/1 | 0/1 | 0/2                                                                   | 0/0 | 1/2 | 0/11                                                                    | 3/10 | 4/21  | 3/10                                                                                                        | 0/3 | 2/14 | 4/33               | 4/16  | 7/42  | 15/91  |
| Macrocephaly                                         | 2/11                                                                                                                                             | 1/4 | 1/2 | 1/3                                                                   | 0/1 | 0/0 | 2/2                                                                   | 0/0 | 0/2 | 8/21                                                                    | 2/11 | 10/17 | 3/11                                                                                                        | 1/4 | 5/9  | 16/48              | 4/20  | 16/30 | 36/98  |
| Pulmonic stenosis                                    | 0/8                                                                                                                                              | 1/5 | 0/6 | 0/2                                                                   | 0/2 | 1/1 | 0/3                                                                   | 0/0 | 0/5 | 0/23                                                                    | 0/13 | 0/20  | 0/8                                                                                                         | 0/3 | 0/14 | 0/44               | 1/23  | 1/46  | 2/113  |

<sup>a</sup>All bone abnormalities included, i.e., scoliosis (n = 27), pectus excavatum (n = 4), pectus carinatum (n = 6), long bone dysplasia (n = 4), pseudarthrosis (n = 2), bone cysts (n = 2), sphenoid wing dysplasia (n = 2), ulnar aplasia, dural ectasia, 4<sup>th</sup> lumbar vertebrae fragmentation, bowed long bones, tibial dysplasia, clinodactyly, postaxial polydactyly, and cherubism.

<sup>b</sup>At least two cutaneous/subcutaneous neurofibromas were required to be considered as “positive for the criterion of neurofibromas.”

<sup>c</sup>The frequency of both symptomatic and asymptomatic spinal neurofibromas in individuals who had done MRI examination.

<sup>d</sup>The presence or absence of symptomatic OPGs was determined by ophthalmological examination and confirmed by MRI.

<sup>e</sup>Including only individuals without signs of symptomatic OPGs who underwent MRI examination.

<sup>f</sup>Including benign and malignant neoplasms, except for OPGs and neurofibromas.

<sup>g</sup>As no specific growth curves are available for the Hispanic and Asian populations, Hispanic and Asian individuals were excluded as having short or normal stature.

**Table 2. Frequency of Clinical Features in Cohorts of Individuals with a Missense Mutation Affecting Leu844, Cys845, Ala846, Leu847, and Gly848**

| NF1 Feature                                       | Number of Individuals (%) [95% Confidence Interval] |                         |                                  |                          |                          |
|---------------------------------------------------|-----------------------------------------------------|-------------------------|----------------------------------|--------------------------|--------------------------|
|                                                   | Leu844                                              | Cys845                  | Ala846                           | Leu847                   | Gly848                   |
| >5 CALMs                                          | 25/25 (100) [86.7–100]                              | 9/11 (81.8) [52.3–94.9] | 8/10 (80) [49–94.3]              | 73/77 (94.8) [87.4–98]   | 15/34 (44.1) [28.9–60.6] |
| Skinfold freckling <sup>a</sup>                   | 10/12 (83.3) [55.2–95.3]                            | 5/7 (71.4) [35.9–91.8]  | 6/6 (100) [61–100]               | 44/47 (93.6) [82.8–97.8] | 11/23 (47.8) [29.2–67]   |
| Lisch nodules                                     | 7/17 (41.2) [21.6–64]                               | 1/3 (33.3) [6.2–79.2]   | 2/4 (50) [15–85]                 | 24/47 (51.1) [37.2–64.7] | 8/27 (29.6) [15.9–48.5]  |
| Plexiform neurofibromas <sup>a</sup>              | 5/14 (35.7) [16.3–61.2]                             | 4/7 (57.1) [25–84.2]    | 2/3 (66.7) [20.8–93.9]           | 22/46 (47.8) [34.1–61.9] | 8/22 (36.4) [19.7–57]    |
| Cutaneous neurofibromas <sup>b</sup>              | 7/9 (77.8) [45.3–93.7]                              | 3/4 (75) [30.1–95.4]    | 4/5 (80) [37.6–96.4]             | 28/33 (84.9) [69.1–93.4] | 5/18 (27.8) [12.5–50.9]  |
| Subcutaneous neurofibromas <sup>b</sup>           | 6/8 (75) [40.9–92.9]                                | 1/4 (25) [4.6–69.9]     | 3/5 (60) [23.1–88.2]             | 17/30 (56.7) [39.2–72.6] | 6/18 (33.3) [16.3–56.3]  |
| Symptomatic spinal neurofibromas <sup>a</sup>     | 0/11 (0) [0–25.9]                                   | 1/6 (16.7) [3–56.4]     | 0/2 (0) [0–65.8]                 | 3/40 (7.5) [2.6–19.9]    | 8/20 (40) [21.9–61.3]    |
| Spinal neurofibromas by MRI <sup>a,c</sup>        | 0/5 (0) [0–43.5]                                    | 2/3 (66.7) [20.8–93.9]  | 0/1 (0) [0–79.4]                 | 5/22 (22.7) [10.1–43.4]  | 12/14 (85.7) [60.1–96]   |
| Symptomatic OPGs, age ≥ 5 years <sup>d</sup>      | 1/21 (4.8) [0.9–22.7]                               | 0/7 (0) [0–35.4]        | 2/5 (40) [11.8–76.9]             | 5/47 (10.6) [4.6–22.6]   | 3/24 (12.5) [4.3–31]     |
| Asymptomatic OPGs, age ≥ 5 years <sup>e</sup>     | 4/10 (40) [16.8–68.7]                               | 0/4 (0) [0–49]          | 0/3 (0) [0–56.2]                 | 11/25 (44) [26.7–62.9]   | 1/10 (10) [1.8–40.4]     |
| Other neoplasms <sup>f</sup>                      | 2/23 (8.7) [2.4–26.8]                               | 0/7 (0) [0–35.4]        | 0/6 (0) [0–39]                   | 15/72 (20.8) [13.1–31.6] | 4/31 (12.9) [5.1–28.9]   |
| Skeletal abnormalities                            | 9/25 (36) [20.3–55.5]                               | 5/10 (50) [23.7–76.3]   | 0/8 (0) [0–32.4]                 | 23/67 (34.3) [24.1–46.3] | 11/34 (32.4) [19.1–49.2] |
| Noonan syndrome features                          | 2/22 (9.1) [2.5–27.8]                               | 1/7 (14.3) [2.6–51.3]   | 0/7 (0) [0–35.4]                 | 6/66 (9.1) [4.2–18.5]    | 1/32 (3.1) [0.6–15.8]    |
| Pulmonic stenosis                                 | 1/19 (5.3) [0.9–24.6]                               | 1/5 (20) [3.6–62.5]     | 0/8 (0) [0–32.4]                 | 0/56 (0) [0–6.4]         | 0/25 (0) [0–13.3]        |
| Short stature <sup>g</sup>                        | 1/13 (7.7) [13.7–33.3]                              | 1/5 (20) [3.6–62.5]     | 1/4 (25) [4.6–69.9]              | 7/42 (16.7) [8.3–30.6]   | 5/27 (18.5) [8.2–36.7]   |
| Macrocephaly                                      | 4/17 (23.5) [9.6–47.3]                              | 1/4 (25) [4.6–69.9]     | 2/4 (50) [15–85]                 | 20/49 (40.8) [28.2–54.8] | 9/24 (37.5) [21.2–57.3]  |
| Cognitive impairment and/or learning disabilities | 6/21 (28.6) [13.8–50]                               | 4/10 (40) [16.8–68.7]   | 4/9 (44.4) [18.9–73.3]           | 29/65 (44.6) [33.2–56.7] | 13/33 (39.4) [24.7–56.3] |
| Severe phenotype, age ≥ 19 years <sup>h</sup>     | 7/9 (77.8) [45.3–93.7]                              | 4/6 (66.7) [30–90.3]    | 1/6 (16.7) [3–56.4] <sup>i</sup> | 32/36 (88.9) [74.7–95.6] | 12/18 (66.7) [43.8–83.7] |

<sup>a</sup>In individuals ≥ 9 years.<sup>b</sup>In individuals ≥ 19 years.<sup>c</sup>The frequency of both symptomatic and asymptomatic spinal neurofibromas in individuals who had undergone MRI examination.<sup>d</sup>The presence or absence of symptomatic OPGs was determined by ophthalmological examination and confirmed by MRI.<sup>e</sup>Including only individuals without signs of symptomatic OPGs who underwent MRI examination.<sup>f</sup>Including benign and malignant neoplasms, except for OPG and neurofibromas.<sup>g</sup>As no specific growth curves are available for the Hispanic and Asian populations, Hispanic and Asian individuals were excluded as having short or normal stature.<sup>h</sup>Individual was classified as having a severe phenotype if at least one of the following features was observed: plexiform and/or symptomatic spinal neurofibroma, symptomatic OPG, malignant neoplasm, or osseous lesions.<sup>i</sup>Among individuals with a missense mutation affecting codon 846, the status of plexiform and spinal neurofibromas was known only for 2/6 individuals (UG-R0781-S and UG-R665-F), thus a severe phenotype cannot be excluded in the remaining four individuals with missing data.



**Table 3. Comparison of Clinical Features of the Studied Group with the *NF1* Arg1809 Cohort, the *NF1* Met992del Cohort, and Large-Scale Previously Reported Cohorts of Individuals with “Classic” *NF1***

| NF1 Feature                                         | Number of Individuals (%)     |                               |                            |                                                                | p Value (2-Tailed Fisher’s Exact Test) |                             |                                 |
|-----------------------------------------------------|-------------------------------|-------------------------------|----------------------------|----------------------------------------------------------------|----------------------------------------|-----------------------------|---------------------------------|
|                                                     | aa 844–848                    | Arg1809 <sup>a</sup>          | Met992del <sup>b</sup>     | Previously Reported NF1 Cohorts                                | aa 844–848 versus Arg1809              | aa 844–848 versus Met992del | aa 844–848 versus “Classic” NF1 |
| >5 CALMs                                            | 130/157 (82.8)                | 157/169 (92.9)                | 46/47 (97.9)               | 1,537/1,728 (89) <sup>c</sup>                                  | 0.0060* ↘                              | 0.0067* ↘                   | 0.0263 ↘                        |
| Skinfold freckling                                  | 104/144 (72.2)                | 95/161 (59)                   | 32/47 (68.1)               | 1,403/1,667 (84.2) <sup>c</sup>                                | 0.0164 ↗                               |                             | 0.0007** ↘                      |
| Lisch nodules                                       | 42/98 (42.9)                  | 12/120 (10)                   | 3/38 (7.9)                 | 729/1,237 (58.9) <sup>c</sup>                                  | <0.0001** ↗                            | <0.0001** ↗                 | 0.0028* ↘                       |
| Major external plexiform neurofibromas <sup>d</sup> | 36/92 (39.1)                  | 0/105 (0)                     | 0/41 (0)                   | 120/648 (18.5) <sup>e,f</sup>                                  | <0.0001** ↗                            | <0.0001** ↗                 | <0.0001** ↗                     |
| Cutaneous neurofibromas <sup>g</sup>                | 47/69 (68.1)                  | 0/57 (0)                      | 0/18 (0)                   | 656/723 (90.7) <sup>f,h,i,j</sup>                              | <0.0001** ↗                            | <0.0001** ↗                 | <0.0001** ↘                     |
| Subcutaneous neurofibromas <sup>g</sup>             | 33/65 (50.8)                  | 0-5/57 (0-8.8) <sup>k</sup>   | ND                         | 297/515 (57.7) <sup>f,i,j</sup>                                | <0.0001** ↗                            |                             |                                 |
| Symptomatic spinal neurofibromas <sup>d,i</sup>     | 12/79 (15.2)<br>13/127 (10.2) | 0/40 (0)<br>0/76 (0)          | 1/41 (2.4)<br>1/47 (2.1)   | 2/119 (1.7) <sup>e</sup><br>36/2,058 (1.8) <sup>e,f,m</sup>    | 0.0080* ↗<br>0.0022* ↗                 | 0.0341 ↗                    | 0.0004** ↗<br><0.0001** ↗       |
| Symptomatic OPGs, age ≥ 5 years <sup>l,n</sup>      | 11/104 (10.6)<br>12/136 (8.8) | 0/114 (0)<br>0/139 (0)        | 0/46 (0)<br>0/47 (0)       | 7/180 (3.9) <sup>e,o</sup><br>64/1,650 (3.9) <sup>c</sup>      | 0.0002** ↗<br>0.0002** ↗               | 0.0186 ↗<br>0.0384 ↗        | 0.0404 ↗<br>0.0125* ↗           |
| Asymptomatic OPGs, age ≥ 5 years <sup>l,p</sup>     | 16/52 (30.8)<br>18/63 (28.6)  | 0/35 (0)<br>0/38 (0)          | ND                         | 2/45 (4.4) <sup>o</sup><br>70/519 (13.5) <sup>q,r,s</sup>      | 0.0001** ↗<br><0.0001** ↗              |                             | 0.0012** ↗<br>0.0043* ↗         |
| Other malignant neoplasms <sup>t</sup>              | 13/139 (9.4)                  | 2/155 (1.3) <sup>u</sup>      | 0/47 (0)                   | 18/523 (3.4) <sup>f</sup>                                      | 0.0023* ↗                              | 0.0409 ↗                    | 0.0061* ↗                       |
| Skeletal abnormalities <sup>d,i</sup>               | 38/91 (41.8)<br>48/144 (33.3) | 14/72 (19.4)<br>21/126 (16.7) | 8/41 (19.5)<br>9/47 (19.2) | 14/96 (14.6) <sup>e</sup><br>144/948 (15.2) <sup>e,f,i,v</sup> | 0.0025* ↗<br>0.0020* ↗                 | 0.0174 ↗                    | <0.0001** ↗<br><0.0001** ↗      |
| Scoliosis <sup>g</sup>                              | 20/64 (31.3)                  | 6/48 (12.5)                   | 2/18 (11.1)                | 51/236 (21.6) <sup>b,j</sup>                                   | 0.0241 ↗                               |                             |                                 |
| Noonan syndrome features                            | 10/134 (7.5)                  | 46/148 (31.1)                 | 4<br>(all from 1 family)   | 57/1,683 (3.4) <sup>c</sup>                                    | <0.0001** ↘                            |                             | 0.0276 ↗                        |
| Pulmonic stenosis                                   | 2/113 (1.8)                   | 14/132 (10.6)                 | 4/47 (8.5)                 | 25/2,322 (1.1) <sup>w</sup>                                    | 0.0076* ↘                              |                             |                                 |
| Short stature                                       | 15/91 (16.5)                  | 32/111 (28.8)                 | 5/47 (10.6)                | 109/684 (15.9) <sup>e,i</sup>                                  | 0.0451 ↘                               |                             |                                 |
| Macrocephaly                                        | 36/98 (36.7)                  | 31/107 (29)                   | 4/45 (8.9)                 | 239/704 (33.9) <sup>e,i</sup>                                  |                                        | 0.0005** ↗                  |                                 |
| Cognitive impairment and/or learning disabilities   | 56/138 (40.6)                 | 80/159 (50.3)                 | 8/47 (17)                  | 190/424 (44.8) <sup>e,f</sup>                                  |                                        | 0.0042* ↗                   |                                 |

Statistically significant p values with false discovery rates of 0.05 (indicated by \*) and 0.01 (indicated by \*\*) after correction for multiple testing using Benjamini-Hochberg procedure (see details in Table S10). After applying the Benjamini-Hochberg correction,  $p \leq 0.0125$  remained statistically significant at FDR of 0.05, while p values  $\leq 0.0012$  were still be considered as significantly different at FDR of 0.01. The black arrows indicate the statistically significant differences of the NF1 clinical features prevalence between the studied group and the cohort(s) used for the comparison, with the up and down arrows representing an increase and a decrease of the prevalence in the studied group, respectively. Abbreviation: ND, no data

<sup>a</sup>Based on data from Pinna et al.,<sup>13</sup> Rojnuangnit et al.,<sup>14</sup> Nyström et al.,<sup>25</sup> Ekvall et al.,<sup>26</sup> and Santoro et al.<sup>27</sup>

<sup>b</sup>Based on data from Upadhyaya et al.<sup>12</sup>

<sup>c</sup>Previous NF1 cohort used for comparison: Friedman and Birch.<sup>32</sup>

<sup>d</sup>In individuals  $\geq 9$  years in this study and Arg1809,  $\geq 10$  years in Met992del and other studies.

<sup>e</sup>Previous NF1 cohort used for comparison: Huson et al.<sup>7</sup>

<sup>f</sup>Previous NF1 cohort used for comparison: McLaughran et al.<sup>34</sup>

<sup>g</sup>In individuals  $\geq 19$  years in this study and Arg1809,  $\geq 20$  years in Met992del and other studies.

<sup>h</sup>Previous NF1 cohort used for comparison: Huson et al.<sup>28,29</sup>

<sup>i</sup>Previous NF1 cohort used for comparison: Khosrotehrani et al.<sup>38</sup>

<sup>j</sup>Previous NF1 cohort used for comparison: Plotkin et al.<sup>39</sup>

<sup>k</sup>Five individuals with few (1–6) small, subcutaneous “possible” neurofibromas, none were biopsied and therefore none have been histologically confirmed.<sup>14</sup>

<sup>l</sup>Second value is the frequency of a particular feature regardless of the individuals’ age.

<sup>m</sup>Previous NF1 cohort used for comparison: Thakkar et al.<sup>35</sup>

<sup>n</sup>The presence or absence of symptomatic OPGs was determined by ophthalmological examination and confirmed by MRI.

<sup>o</sup>Previous NF1 cohort used for comparison: Van Es et al.<sup>31</sup>

<sup>p</sup>Including only individuals without signs of symptomatic OPGs who underwent MRI examination.

<sup>q</sup>Previous NF1 cohort used for comparison: Listerneck et al.<sup>30</sup>

<sup>r</sup>Previous NF1 cohort used for comparison: Blazo et al.<sup>37</sup>

<sup>s</sup>Previous NF1 cohort used for comparison: Blanchard et al.<sup>40</sup>

<sup>t</sup>Only malignant neoplasms, hence excluding neurofibromas and OPGs, have been taken into account.

<sup>u</sup>Breast cancer (n = 1) and Ewing sarcoma (n = 1) were found in the *NF1* Arg1809 cohort, no follow-up information on these individuals was available.<sup>14</sup>

<sup>v</sup>Previous NF1 cohort used for comparison: Cnossen et al.<sup>33</sup>

<sup>w</sup>Previous NF1 cohort used for comparison: Lin et al.<sup>36</sup>

in Alamut visual software v.2.9.0 (Interactive Biosoftware). The presence or absence of the variants was checked in population databases, including the Genome Aggregation Database (gnomAD), 1000 Genomes, and the Exome Variant Server (EVS) as well as in disease databases: the Leiden Open Variation Database (LOVD), ClinVar, and the Human Gene Mutation Database (HGMD) (last accessed May 2017). Evolutionary conservation for human neurofibromin GenBank: NP\_000258.1 residues 804–950 was evaluated using Clustal software v.2.0.12. The palindromic sequences and quadruplex forming G-Rich sequences (QGRS) were identified by Palindrome search and QGRS Mapper, respectively.

Interpretation of variant pathogenicity was performed based on the American College of Medical Genetics and Genomics (ACMG) recommendations.<sup>43</sup>

### Statistical Analysis

For univariate analysis, two-tailed Fisher's exact test was used to compare categorical variables with a *p* value < 0.05 considered as statistically significant. The resulting *p* values were adjusted for multiple comparisons using Benjamini-Hochberg (B-H) procedure with false discovery rates (FDRs) of 0.05 and 0.01. The 95% confidence interval (CI) was also calculated when appropriate. All statistical analyses were performed with GraphPad and VassarStats softwares.

## Results

### Description of Missense Mutations Affecting Codons 844–848

Exon 21 [16] is the largest *NF1* exon (441 nucleotides), and in it we identified, besides the missense variants affecting the codons 844–848, a total of 19 different missense variants in 35 unrelated individuals from the UAB cohort. Fourteen of these alterations were classified as variants of uncertain significance (8/19) or likely benign (6/19) and reported 1–3 times in the UAB cohort (Figure S2). Only five variants were classified as pathogenic (4/19) or likely pathogenic (1/19) according to the current recommendations.<sup>43</sup> Region 844–848 in exon 21 [16] stood out due to its high frequency of variants compared with the neighboring codons, indicating functional importance (Figures S2 and S3). A similar distribution and spectrum of missense alterations in the *NF1* exon 21 [16] was observed in the publicly available databases (ClinVar, LOVD, and HGMD). Besides a clear cluster of recurrent variants in codons 844–848, other alterations spread over the entire exon 21 [16] were mostly classified as variants of uncertain significance and reported 1–2 times in these databases (Figure S2). The frequency of this cluster of variants in aa 844–848 is ~0.8% (67/8,400) in unrelated *NF1* mutation-positive individuals from the UAB cohort, second only to the p.Arg1809 (~1.2%), and therefore represents a significant hotspot for missense mutations within *NF1*.

In the 129 unrelated individuals reported here, we identified 12 different *NF1* missense alterations affecting one of five neighboring codons in exon 21 [16] (Table 1 and Figure 1). Within the group of individuals with p.Gly848Arg, two different substitutions were observed:

c.2542G>A (6/14) and c.2542G>C (8/14). Detailed characteristics of the identified missense mutations are shown in Tables S2–S4 and Figure 1. All variants identified in this study with confirmed origin of the variant were submitted to the LOVD and ClinVar databases. Based on the data accumulated in this report (Tables S1 and S2), these variants can all be classified as pathogenic (Table S4) according to current recommendations.<sup>43</sup>

Among the aforementioned variants, 8/12 were present in the LOVD database with 5/8 classified as pathogenic (c.2533T>C [p.Cys845Arg], c.2536G>C [p.Ala846Pro], c.2537C>A [p.Ala846Asp], c.2540T>C [p.Leu847Pro], and c.2543G>A [p.Gly848Glu]) and 3/8 as variants of uncertain significance (c.2534G>A [p.Cys845Tyr], c.2540T>G [p.Leu847Arg], and c.2542G>C [p.Gly848Arg]). Eight of the 12 were present in ClinVar, including 3/8 classified as pathogenic (c.2531T>G [p.Leu844Arg], c.2540T>C [p.Leu847Pro], and c.2542G>C [p.Gly848Arg]), 1/8 as likely pathogenic (c.2534G>A [p.Cys845Tyr]), 1/8 as a variant of uncertain significance (c.2533T>C [p.Cys845Arg]), and 3/5 with no significance provided (c.2530C>T [p.Leu844Phe], c.2531T>C [p.Leu844Pro], and c.2543G>A [p.Gly848Glu]) (Tables S2 and S3). One individual (UAB-R4444) with c.2531T>A (p.Leu844His) carried another novel alteration (c.2524G>A); assuming both variants reside in *cis*, this alteration should be described as c.2524\_2531delinsAGCTTCCA (p.Gly842\_Leu844delinsSerPheHis). None of these variants, except for c.2531T>G (p.Leu844Arg), has been reported in 129,639 unrelated controls of the gnomAD and EVS databases or in the 1000 Genomes Project; c.2531T>G (p.Leu844Arg) was reported once in Latino (the variant's frequency in all populations is 0.00041%). Based on *in silico* analysis, all alterations are predicted to be deleterious (SIFT) and probably or possibly damaging (PolyPhen-2). Additionally, CADD classified all variants as more likely to have deleterious effects (range: 22.6 to 31). In contrast to results of *in silico* analysis, suggesting a possible effect of two identified alterations (c.2542G>A and c.2543G>A) on splicing through creation of a novel exonic splice acceptor sequence, transcript analysis and sequencing showed a minor effect on splicing only for c.2542G>A in three individuals (UAB-R9493, UAB-R1474, and UAB-R0008), i.e., low levels of r.2410\_2543del. The other individuals with c.2542G>A screened with an RNA-based approach (UAB-R3513 and UAB-R4476) in whom no missplicing was observed also carried the nearby benign variant c.2544G>A (p.Gly848=) (rs17883704) with both variants proven to reside in *cis* through next-generation sequencing. As missplicing was observed only in individuals carrying c.2542G>A in the absence of rs17883704 (Figure S4), rs17883704 is hypothesized to have a modifying effect. All missense mutations, except for c.2536G>C (p.Ala846Pro), were proven to be *de novo* in at least one proband; a total of 26 probands with unaffected parents were proven to have a *de novo* mutation, but formal confirmation of paternity/maternity by identity testing was pursued only for individuals tested in the Netherlands



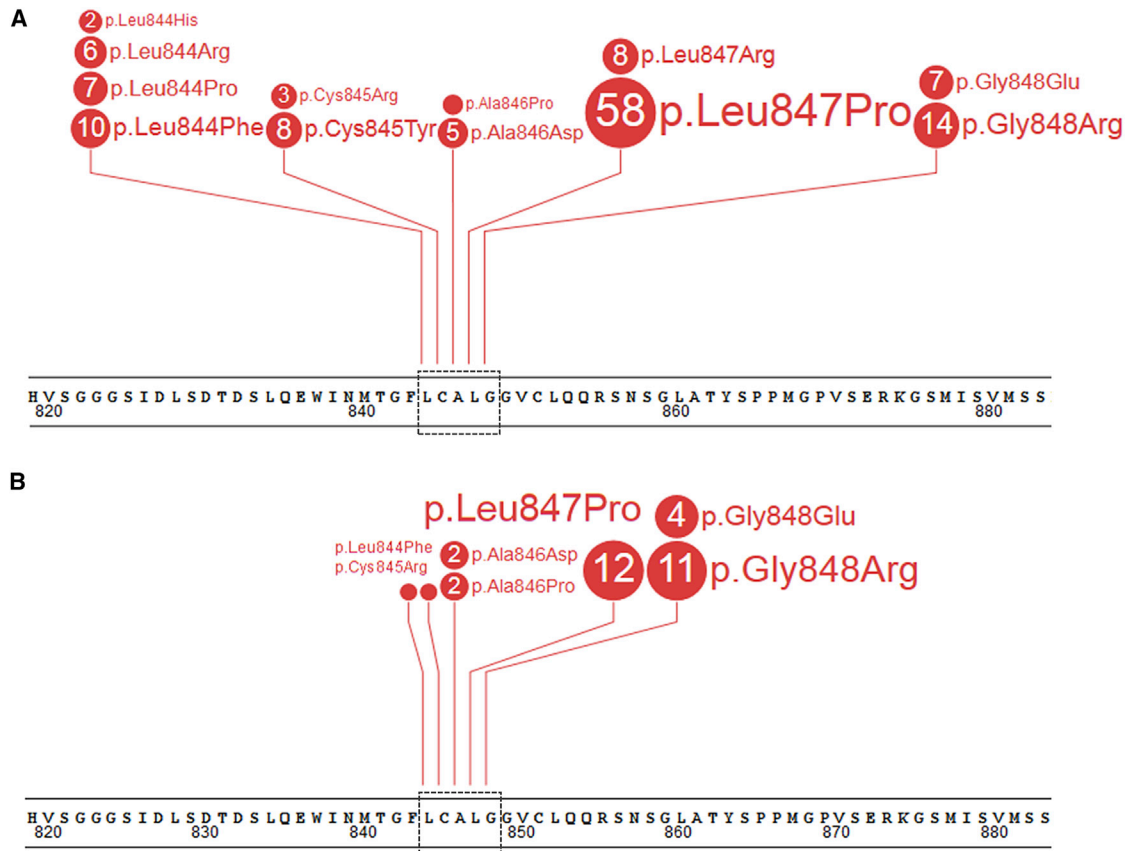

**Figure 1. Spectrum of Missense Mutations Affecting *NF1* Codons 844–848 in the Cohort of 129 Proband and 33 Relatives**  
 Shown are 129 probands (A) and 33 relatives (B). Each number in circle corresponds with the total number of individuals heterozygous for a specific mutation. The black dotted lines on the panels present the region 844–848. The figure was prepared using the ProteinPaint application.<sup>44</sup>

(ROT-R02233, ROT-R22853, and ROT-R17435). Additionally, 7/12 missense mutations (c.2530C>T [p.Leu844Phe], c.2533T>C [p.Cys845Arg], c.2536G>C [p.Ala846Pro], c.2537C>A [p.Ala846Asp], c.2540T>C [p.Leu847Pro], c.2542G>C [p.Gly848Arg], and c.2543G>A [p.Gly848Glu]) segregated with the phenotype (at least one individual per family) in 23 affected first-degree relatives from 15 families (Tables S1 and S2 and Figure S5). Finally, all missense mutations affecting amino acids 844–848 are located in a highly conserved region of the CSRD (amino acids 543–909; Figure S6). Besides cysteine at position 845 that is conserved up to zebrafish, all remaining amino acids are evolutionarily conserved up to *Drosophila melanogaster* (Ala846 and Gly848) and even to yeast IRA1 and/or IRA2 (Leu844 and Leu847). In chimpanzee, rat, and mouse all amino acids from 775 to 856 are fully evolutionarily conserved. None of these variants has been functionally characterized.

#### Demographic and Clinical Characterization of the Studied Cohort

A total of 162 individuals from 129 unrelated families were enrolled in the study, including 37/129 (28.7%) familial and 89/129 (69%) sporadic case subjects; 3/129 (2.3%) individuals had an unknown family history

(ROT-R13734, ROT-R89874, and CAR-R8012M6). Detailed demographic and clinical descriptions of the individuals included in the study are shown in Tables 1 and S1 and Figure S5.

The complete phenotypic checklist forms were collected from 151/162 individuals (93.2%). Of these, 125/151 (82.8%) fulfilled the NIH diagnostic criteria and 118/151 (78.2%) fulfilled the NIH diagnostic criteria if family history was excluded as a criterion. Among 26/151 individuals who did not fulfill the NIH diagnostic criteria (with 20/26 being  $\leq 8$  years), multiple CALMs-only ( $>5$ ) were present in 16/26,  $<6$  CALMs-only were present in 8/26, and 2/26 did not have any pigmentary manifestations but had externally visible plexiform neurofibromas (UAB-R9135 and UG-R5831) (Table S5). CALMs-only ( $<6$ ) were observed mostly in individuals with a missense mutation at codon 848 (5/8 with c.2542G>C [p.Gly848Arg], 1/8 with c.2542G>A [p.Gly848Arg], 1/8 with c.2543G>A [p.Gly848Glu], and 1/8 with c.2534G>A [p.Cys845Tyr]).

Among 102 individuals  $\geq 9$  years, more than 5 CALMs and skinfold freckling were present in 79.8% (79/99) and 80% (76/95), respectively (Table 1). Both clinical features were found in 71.6% (68/95) of case subjects. Out of 20 individuals  $\geq 9$  years with only few or absolute lack of

CALMs (Table S1), 11 case subjects fulfilled the NIH diagnostic criteria based on presence of other clinical signs, such as skinfold freckles, Lisch nodules, neurofibromas, and/or osseous lesions (UG-R0781, UAB-R3618-M, MIL-R192/982-F, UAB-R4476, MIL-R999/399, MIL-R999/399-M, ROT-R95424, UG-R923-S, UAB-R3237, MAN-R95417G, and MAN-R95417G-C). Among these individuals, 8/11 (72.7%) carried a missense mutation at codon 848. Lisch nodules were reported less frequently (42/98 all ages, but in 34/60  $\geq 9$  years).

Cutaneous and subcutaneous neurofibromas were found in 68.1% (47/69  $\geq 19$  years) and 50.8% (33/65  $\geq 19$  years) of the case subjects, respectively. Thirty adults had both types of tumors (30/64  $\geq 19$  years, 46.9%). Ten individuals  $\geq 17$  years had  $>100$  cutaneous and/or subcutaneous nodules, including a 47-year-old man previously reported<sup>45</sup> with  $>1,400$  neurofibromas (individual counts of externally visible neurofibromas; BRA-R38) and a 17-year-old woman (ROT-R1CMUL) with  $>500$  cutaneous neurofibromas,  $>100$  subcutaneous neurofibromas, and  $>100$  intradermal neurofibromas. Nine out of ten individuals with a very high number of neurofibromas carried a missense mutation at codon 847: c.2540T>G (p.Leu847Arg) (2/9) or c.2540T>C (p.Leu847Pro) (7/9, including two individuals with metastasized MPNSTs). In 16 case subjects with “several” neurofibromas, a more precise estimated number was not reported. Eight individuals (UAB-R5776, UAB-R3618, UAB-R4624, UAB-R7447, UAB-R1002, UAB-R1037-M, UAB-R3237, PAD-R500-C1) were reported to have a single cutaneous or subcutaneous nodule (none histopathologically confirmed); these individuals were considered as “negative for the criterion of neurofibromas” as  $\geq 2$  cutaneous/subcutaneous neurofibromas are required according to the NIH clinical criteria.

45% of the individuals  $\geq 9$  years had known plexiform neurofibromas (41/92  $\geq 9$  years; 47/143 all ages), including externally visible ( $n = 36$ ) and internal ( $n = 5$ ) tumors. For six case subjects, the information was not provided whether plexiform neurofibromas were identified clinically or by MRI. Among all individuals with plexiform neurofibromas, 31/47 presented with one plexiform tumor and 16/47 with  $\geq 2$  plexiform neurofibromas. Plexiform tumors were found in the head, face, and neck area (35.7%, 25/70), limbs (34.3%, 24/70), trunk (17.1%, 12/70), back ( $n = 3$ ), abdomen ( $n = 3$ ), pelvis ( $n = 2$ ), and chest ( $n = 1$ ).

Symptomatic spinal neurofibromas visible by MRI were found in 15.2% of individuals (12/79  $\geq 9$  years; 13/127 all ages). Forty asymptomatic individuals received MRI screening, leading to the identification of another seven case subjects with spinal tumors (Table S6). Approximately one-third of the individuals with spinal tumors (6/20) had fewer than 6 CALMs and no skinfold freckling, whereas in 60% (12/20) plexiform neurofibromas were observed (with 11/12 being externally visible).

Symptomatic OPGs, confirmed by MRI imaging, were found in 11/104 of individuals older than 5 years (10.6%), whereas asymptomatic OPGs were present in

16/52 additional individuals who underwent MRI examination (30.8%  $\geq 5$  years). In 19 of 27 symptomatic and asymptomatic OPGs, the detailed information about the tumor's location was collected, involving optic nerves (2 symptomatic OPGs and 7 asymptomatic OPGs), chiasm (1 symptomatic OPG and 1 asymptomatic OPG), or both locations (6 symptomatic OPGs and 2 asymptomatic OPGs). Three children were diagnosed with a symptomatic OPG (PAD-R300) or asymptomatic OPGs (UAB-R3714 and UAB-R3513) before age 4 years (Table S7).

Skeletal abnormalities were frequently reported (48/144 all ages) and included scoliosis (27/144 all ages, but 20/64  $\geq 19$  years) and pectus anomalies (10/144 all ages: pectus carinatum 6/10 and excavatum 4/10). In addition, long bone dysplasia ( $n = 4$ ), pseudarthrosis ( $n = 2$ ), tibial dysplasia ( $n = 1$ ), bone cysts ( $n = 2$ ), sphenoid wing dysplasia ( $n = 2$ ), ulnar aplasia, likely representing the severe end of ulnar pseudarthrosis with bone resorption and absence of ulnar bone ( $n = 1$ ), dural ectasia ( $n = 1$ ), 4<sup>th</sup> lumbar vertebrae fragmentation ( $n = 1$ ), bowed long bones ( $n = 1$ ), clinodactyly ( $n = 1$ ), postaxial polydactyly ( $n = 1$ ), and cherubism ( $n = 1$ ) were observed in the studied group.

Noonan syndrome features were observed in 10/134 (7.5%) individuals. One previously reported individual (UAB-R624) with a family history of *PTPN11*-positive (MIM: 176876) Noonan syndrome (MIM: 163950) had a severe phenotype of pulmonic stenosis and aortic coarctation, dysmorphic features (high forehead, hypertelorism, downslanting palpebral fissures, short neck with a low posterior hair line), short stature, pectus carinatum,  $>5$  CALMs, axillary and inguinal freckling, plexiform and cutaneous neurofibromas, and symptomatic OPG with signs of hydrocephalus.<sup>46</sup> Besides the familial *PTPN11* c.1529A>G (p.Gln510Arg) inherited from the individual's father, the *NF1* missense mutation c.2531T>G (p.Leu844Arg) was found *de novo* in the proband (Figure S5). In other individuals with Noonan syndrome features (UAB-R2696, UAB-R5001, UAB-R3725, and UAB-R4676) no pathogenic or likely pathogenic variants in Noonan-related disorders genes (*PTPN11* [MIM:176876], *SPRED1* [MIM:609291], *BRAF* [MIM: 164757], *CBL* [MIM: 165360], *HRAS* [MIM: 190020], *KRAS* [MIM: 190070], *MAP2K1* [MIM: 176872], *MAP2K2* [MIM: 601263], *NRAS* [MIM: 164790], *RAF1* [MIM: 164760], *SHOC2* [MIM: 602775], *SOS1* [MIM: 182530], *RIT1* [MIM: 609591], *RASA2* [MIM: 601589], and *SOS2* [MIM: 601247]) were identified. Cardiovascular abnormalities observed in the studied group included hypertension ( $n = 7$ , one related to renal artery stenosis), pulmonic stenosis ( $n = 2$ ), mitral valve stenosis, atrial septal defect, ventricular septal defect, Moyamoya disease, pericarditis carcinomatosa, mitral valve insufficiency, mild pulmonic insufficiency, and hypertrophic cardiomyopathy (each observed in a single individual). Short stature (PC  $\leq 3$ ) and macrocephaly (PC  $\geq 98$ ) were found in 15/91 (16.5%) and 36/98 (36.7%), respectively. Of the 138 case subjects with

provided developmental data, 56 individuals had abnormal development presenting with at least one of the following forms of cognitive impairment and/or learning difficulties: learning disabilities (n = 43), developmental delay (n = 30), speech delay (n = 8), ADD (n = 8), ADHD (n = 10), motor delay (n = 5), autism spectrum (n = 2), or Asperger syndrome (n = 1). Seven individuals had significant global developmental delay with/without speech delay, learning difficulties, and/or AD(H)D, including one with a full scale intelligence quotient (FSIQ) score 59. Additionally, three individuals were reported to have frequent migraine headaches and two had epilepsy and/or psychiatric problems.

For 139/162 individuals, data on the presence or absence of tumors other than neurofibromas and OPGs was available. 13 of 139 (9.4%) individuals were diagnosed with malignant neoplasms (Table S8), including embryonal rhabdomyosarcoma (3/13), MPNST (7/13, including one woman with MPNST and *BRCA1/2*-negative breast cancer), colon cancer (1/13), medullary thyroid carcinoma (1/13), and juvenile myelomonocytic leukemia (JMML) (1/13). Individuals  $\geq 14$  years old with c.2540T>C (p.Leu847Pro) had a higher number of malignant neoplasms compared to individuals carrying other missense mutations in the studied region (p = 0.0448; Table S9). Moreover, this mutation was present in most case subjects with MPNST (5/7), except for one each carrying c.2543G>A (p.Gly848Glu) or c.2530C>T (p.Leu844Phe). Four of seven individuals with MPNST died before age 30 years (Table S8). Hypothalamic glioma (n = 1), lipoma (n = 1), cerebral tumors (n = 3), non-ossifying fibroma (n = 2), and odontogenic fibroma (n = 1) were also reported.

The frequency of clinical features in individuals heterozygous for missense mutations affecting one of five neighboring codons 844–848 is presented in Table 2. A lower number of CALMs, freckling, and cutaneous neurofibromas was observed in case subjects with missense mutations at codon 848 (all p < 0.0001; Table S9); however, these individuals had a higher prevalence of symptomatic spinal neurofibromas (p = 0.0012; Table S9).

Taken together, a severe phenotype, including at least one of the following features (plexiform and/or symptomatic spinal neurofibromas, symptomatic OPGs, malignant neoplasm, or osseous lesions) was observed in 75% of adult NF1-affected individuals (56/75  $\geq 19$  years; Table 2).

### Comparison of Clinical Features Observed in the Studied Cohort with Individuals Heterozygous for p.Arg1809 and p.Met992del Mutations and Cohort of Individuals with “Classic” NF1 Phenotype

Comparison of clinical features of the studied group with the *NF1* p.Arg1809 and p.Met992del cohorts as well as previously described large-scale cohorts of individuals with “classic” NF1 is shown in Table 3. The complete list of adjusted p values with FDRs at 0.05 and 0.01 after B-H correction for multiple testing is presented in Table S10. All p values  $\leq 0.0125$  and p values  $\leq 0.0012$  remained

statistically significant after applying the B-H correction at FDRs of 0.05 and 0.01, respectively.

In the current study, we observed a significantly higher number of major external plexiform neurofibromas compared with the *NF1* p.Arg1809 and the *NF1* p.Met992del cohorts, as well as classic NF1-affected population (all p < 0.0001; statistically significant after B-H correction at FDR of 0.01). Importantly, while none of the individuals carrying the p.Arg1809 and p.Met992del had external plexiform, cutaneous, and/or subcutaneous neurofibromas,  $\sim 71\%$  of the individuals  $\geq 19$  years with a missense mutation affecting codons 844–848 had cutaneous and/or subcutaneous neurofibromas (p < 0.0001; statistically significant after B-H correction at FDR of 0.01) and  $\sim 39\%$  of the individuals  $\geq 9$  years had externally visible plexiform neurofibromas (p < 0.0001; statistically significant after B-H correction at FDR of 0.01). Compared with p.Arg1809, p.Met992del, and classic NF1-affected cohorts, at least 5-fold greater prevalence of symptomatic spinal neurofibromas was reported in the studied group (0%–2.1% versus 10.2%) which was statistically significant at FDR of 0.01 for the general NF1-affected population (p < 0.0001) and at FDR of 0.05 for the p.Arg1809 cohort (p = 0.0022).

Symptomatic and asymptomatic OPGs were more frequent compared to individuals with p.Arg1809, p.Met992del, and classic NF1, with symptomatic and asymptomatic OPGs statistically increased after B-H correction at FDR of 0.05 in the 844–848 cohort compared to the classic NF1-affected cohorts (p = 0.0125 and p = 0.0043, respectively) and at FDR of 0.01 compared with the p.Arg1809 cohort (p = 0.0002 and p < 0.0001, respectively). The overall prevalence of malignant neoplasms, other than neurofibromas and OPGs, was also higher in the studied group compared to a large cohort of classic NF1-affected individuals (9.4% versus 3.4%; p = 0.0061, statistically significant at FDR of 0.05 after B-H correction).

Additionally, the aa 844–848 cohort had a significantly increased frequency of skeletal abnormalities compared to individuals with p.Arg1809 and classic NF1 phenotypes (both statistically significant after B-H correction at FDR of 0.05), regardless of the age. Scoliosis was reported more frequently compared with p.Arg1809 individuals (31.3% versus 12.5% in  $\geq 19$  years), but this difference was not statistically significant after B-H correction.

The prevalence of CALMs was lower than in p.Arg1809 and p.Met992del cohorts (both significant at FDR of 0.05 after B-H correction), while skinfold freckles occurred more commonly in classic NF1-affected cohorts than in the studied group (significant at FDR of 0.01 after B-H correction). Noonan syndrome features were significantly less frequent in the studied group compared to individuals with p.Arg1809 (significant at FDR of 0.01 after B-H correction). In line with this finding, pulmonic stenosis was very rarely observed in the cohort (1.8% versus 10.6% in the p.Arg1809 cohort; significant at FDR of 0.05 after B-H correction). All cohorts, except for the p.Met992del, shared

a similar frequency of cognitive impairment and/or learning difficulties (~45%).

## Discussion

We present 162 individuals heterozygous for a constitutional *NF1* missense mutation in one of five neighboring codons 844–848 who have a high prevalence of a severe NF1 phenotype, including plexiform and/or symptomatic spinal neurofibromas, symptomatic OPGs, and other malignant neoplasms, as well as bone abnormalities. The frequency of the cluster of these mutations is ~0.8% (67/8,400) in unrelated *NF1* mutation-positive individuals from the UAB cohort, second only to the p.Arg1809 (~1.2%) among the missense variants.

One of the most severe complications in NF1-affected individuals are clinically apparent plexiform neurofibromas affecting 15%–30% of the NF1-affected general population.<sup>7,34,47–50</sup> In this study, externally visible plexiform neurofibromas were found in ~39% of individuals ≥9 years, therefore significantly higher compared with p.Arg1809 and p.Met992del and classic NF1-affected cohorts (significant at FDR of 0.01 after B-H correction; Tables 3 and S10). Individuals in this study did not undergo whole-body MRI; therefore, the frequency provided here is a likely underestimate, as internal asymptomatic plexiform neurofibromas were not accounted for.

As plexiform neurofibromas have been suggested to be associated with a higher lifetime risk for the development of MPNSTs,<sup>50–53</sup> the finding of MPNSTs in 5% (7/139) of the affected in our cohort, which is twice as high as reported by Huson et al. in the South-East Wales cohort,<sup>28,29</sup> is in line with expectations.

Approximately 24%–40% of NF1-affected individuals develop spinal neurofibromas,<sup>35,39,52</sup> but they are most often asymptomatic and not detectable by physical examination. The estimated prevalence of *symptomatic* spinal neurofibromas in the general NF1-affected population is less than 2%.<sup>7,34,35</sup> In the current study, a high number of individuals with *symptomatic* spinal neurofibromas was reported, compared to the classic NF1-affected cohorts (statistically significant at FDR of 0.01 after B-H correction): 13/127 (10.2%) for all ages and 12/79 (15.2%) for ≥9 years. Kluwe et al. suggested that spinal neurofibromas cause symptoms mainly in older case subjects (mean age 32.8 years),<sup>18</sup> but 4 of 13 symptomatic individuals in our cohort were below age 18 (range: 7–17 years). In 40 individuals who underwent MRI examination, an additional seven case subjects with asymptomatic spinal neurofibromas were found. Among all affected individuals, five belonged to two previously reported multi-generation families (UG-R923 and MAN-R95417G) where the spinal tumors segregated within the family.<sup>16,21</sup> For two relatives of these probands, the spinal neurofibromas were recognized only after MRI, although the tumor burden was extensive. None of the individuals had >5 CALMs,

including 2/5 who had <6 CALMs and 3/5 had none. This rare form of NF1 is called familial spinal neurofibromatosis (FSNF).

Plexiform and spinal tumors as well as subcutaneous neurofibromas are associated with a severe NF1 phenotype and may result in significant morbidity in children and adults.<sup>54,55</sup> OPGs, the most common brain tumors in children, are another complication in the general NF1-affected population.<sup>56</sup> The *overall* prevalence of OPGs in the NF1-affected population is ~11%–20%,<sup>39,50,57</sup> but only ~30% of these individuals have clinically *symptomatic* OPGs and present with impaired visual acuity, visual field loss, abnormal color vision, squint, proptosis, and/or hypothalamic dysfunction.<sup>49</sup> Most symptomatic OPGs are diagnosed before age 7 years<sup>57</sup> with the mean age of 5 years.<sup>58</sup> In the studied group, symptomatic OPGs were found in 11/104 (10.6%) of individuals ≥5 years, which is more frequent compared with p.Arg1809 and p.Met992del cohorts (none of the individuals had OPGs) and with classic NF1-affected population (3.9%); however, after applying the B-H correction, only the result of comparison with p.Arg1809 cohort and the general NF1-affected population remained statistically significant at FDR of 0.05 (Tables 3 and S10). Furthermore, there was a higher prevalence of asymptomatic OPGs in 16/52 (30.8%) individuals ≥5 years who underwent MRI examination (statistically significant at FDR of 0.01).

Individuals with NF1 are at higher risk to develop specific malignancies compared with the general population, significantly increasing mortality.<sup>59,60</sup> Besides the high-grade gliomas, the most common malignancies in NF1-affected children are rhabdomyosarcomas, JMML, and neuroblastomas, but accurate estimates on prevalence are not available due to the rarity of these tumors.<sup>61,62</sup> Based on the data provided by Sung et al. and Crucis et al.,<sup>63,64</sup> the prevalence of rhabdomyosarcomas in children with NF1 is estimated at 0.4%–0.5%, while Chang and Shannon reported that the individual risk of JMML in NF1 is ~0.04%.<sup>65</sup> In the studied group, three NF1-affected children younger than 5 years developed embryonal rhabdomyosarcomas, including one individual, now >26 years, who survived both a rhabdomyosarcoma and astrocytoma grade II, diagnosed at the age 2 and 15 years, respectively. Furthermore, one 5-year-old girl (out of 50 children ≤8 years) presented with <6 CALMs and JMML. This girl was heterozygous for two pathogenic *NF1* mutations in the blood, c.2542G>A (p.Gly848Arg) as well as c.1246C>T (p.Arg416\*), with p.Gly848Arg being the first hit given the absence of p.Arg416\* in buccal swabs, indicating somatic mosaicism for p.Arg416\*. A UK population-based hospital admission and death certificate study found that individuals with NF1 have, after excluding the well-established risks of nervous systems tumors, a 2.7-fold increased risk of developing cancers of the esophagus, stomach, colon, liver, lung, bone, thyroid, malignant melanoma, non-Hodgkin lymphoma, chronic myeloid leukemia, breast, and ovary.<sup>66</sup> In the current study, we



noted recurrent malignant tumors, such as MPNSTs (7/139; 5%) (Tables S1 and S8). Among these individuals, one 44-year-old woman previously described with the missense mutation c.2540T>C (p.Leu847Pro) had MPNST, *BRCA1/2*-negative (MIM: 113705 and 600185) breast cancer as well as a high number of cutaneous neurofibromas (>100).<sup>67</sup> In addition, one individual developed a medullary thyroid carcinoma and three first-degree relatives of a Belgian proband with c.2540T>C (p.Leu847Pro) died from malignancies (a metastasized colon adenocarcinoma and two MPNSTs, both deceased before age 26). Taken together, the overall prevalence of malignant neoplasms in the studied group was substantially higher than in the published datasets of the general NF1-affected population (significant at FDR of 0.05 after B-H correction; Tables 3 and S10). Furthermore, specifically mutation p.Leu847Pro seems to confer a high predisposition to develop malignant tumors compared to other missense variants reported in this study ( $p < 0.0448$ ; Table S9), although the CADD score of this variant is not the highest among the studied region (only 26.1; Table S2). Given the predominance of the p.Leu847Pro mutations in the studied cohort (70/162 individuals), larger datasets are required to further refine the increased tumor risk associated with the other mutations within the studied region.

Skeletal abnormalities, including long bone dysplasia with or without pseudarthrosis, scoliosis, sphenoid wing dysplasia, bone cysts, including cherubism, non-ossifying fibromas and osseous giant cell lesions, hand anomalies, anterior chest wall anomalies, and short stature, can lead to serious clinical consequences and significant morbidity.<sup>68</sup> We observed a clear overall increase in the number of skeletal anomalies compared with p.Arg1809 (FDR of 0.05 after B-H correction) and the general NF1-affected population (FDR of 0.01 after B-H correction). As many as 33.3% of the NF1-affected individuals (48/144) presented with one or more osseous lesion, scoliosis ( $n = 27$ ), and pectus anomalies ( $n = 10$ ) being most frequent (18.8% and 6.9%, respectively). The overall frequency would be higher if individuals with short stature (40.3%; 58/144) are included. Rarely reported complications possibly associated with *NF1* status included cherubism, chronic arthritis of multiple joints with elbow contractures, clinodactyly of the 3<sup>th</sup>–5<sup>th</sup> toes, postaxial polydactyly, and ulnar aplasia, likely representing the severe end of ulnar pseudarthrosis with bone resorption and absence of the ulnar bone. Interestingly, the latter has been reported only in two NF1-affected case subjects.<sup>69</sup> Mild to moderate scoliosis was reported in only 18% of *NF1*-positive individuals with bilateral neurofibromas of all spinal roots;<sup>17</sup> however, in our study we observed co-occurrence of scoliosis and spinal tumors in 45% (9/20) of individuals with confirmed symptomatic or asymptomatic spinal neurofibromas (not necessarily affecting all dorsal roots) (Table S6). An additional 11 individuals had scoliosis without evidence of spinal neurofibromas by MRI (Table S1).

Cohorts of individuals with *NF1* missense mutations affecting codons 844–848 and classic NF1-affected population shared a similar frequency for short stature and macrocephaly. Noonan syndrome features were rarely observed in the studied group compared with the p.Arg1809 cohort (significant at FDR of 0.01 after B-H correction). In line with previous studies,<sup>7,34,39,70</sup> intellectual disability, developmental delay, and/or learning difficulties were frequently observed in the current study (40.6%).

Among the 129 unrelated probands with a missense mutation affecting codons 844–848, p.Leu847Pro and p.Gly848Arg are the most recurrent variants, found in 58 and 14 unrelated individuals, respectively (Table S2 and Figure 1). Both alterations are associated with a severe NF1 phenotype, including a high prevalence of plexiform neurofibromas and skeletal abnormalities, compared to the general NF1-affected population. However, missense mutations at p.Gly848 predispose with a greater frequency to symptomatic or asymptomatic spinal tumors, which were found in ~70% of probands carrying the p.Gly848Arg or p.Gly848Glu mutations (9/13  $\geq 9$  years, but in 9/10  $\geq 9$  years who received MRI screening), which is slightly higher than in individuals presenting with a severe phenotype caused by a total *NF1* deletion (8/13  $\geq 9$  years).<sup>71</sup> Several of the severely affected individuals with a missense mutation at p.Gly848 had only few or no pigmentary skin findings. So far, ~100 case subjects have been reported with the true “spinal NF” phenotype<sup>17</sup> and these individuals more frequently carry a splice site or missense mutation spread over the entire *NF1* coding region.<sup>18–20</sup> So far, no single mutation has been correlated with this severe clinical presentation. We provide the specific genotype-phenotype association between a particular *NF1* mutation and the spinal phenotype. Individuals with missense mutations at p.Gly848 appear to constitute a distinct group of NF1-affected individuals with a high prevalence of symptomatic spinal neurofibromas and a clear decrease of pigmentary manifestations (CALMs and skinfold freckles) as well as cutaneous neurofibromas (Tables 2 and S9). Because of the limited number of individuals  $\geq 9$  years old with the missense mutations at codons 844–846, it is still difficult to establish a genotype-phenotype correlation among these cohorts; however, so far these variants also seem to be associated with a severe phenotype, including a high prevalence of plexiform neurofibromas in the p.Cys845 and p.Ala846 cohorts (57.1% and 66.7%, respectively) and OPGs in p.Leu844 cohort (~24% for both symptomatic and asymptomatic OPGs in  $\geq 5$  years). At this moment, it cannot be excluded that two specific genotype-phenotype correlations exist within this small region of *NF1* with the *NF1* codon 847 associated with an increased risk for malignant neoplasia and the *NF1* codon 848 associated with a high prevalence of symptomatic spinal neurofibromas. The current study, however, intended to show that the whole region of 844–848 codons stood out due to its high frequency of



variants compared with the neighboring codons, indicating functional importance. In addition, the cluster of missense mutations here described, although located outside the GRD important for RAS regulation, is clearly associated with a severe phenotype, not reported so far in literature. As the current study necessarily still underestimates the internal tumor burden, as systematic whole-body imaging was not performed, close clinical management seems warranted for individuals presenting with a missense variant affecting aa 844–848.

As NF1 is known for its variable expressivity and age dependency, it is challenging to establish genotype-phenotype correlations. Although we performed a comparative analysis on a large well-described cohort using a standardized phenotypic data collection form, one limitation of the study is that clinical information was collected by physicians from different referral centers, although all were NF1 specialists. Data in this and the previously reported p.Arg1809 cohort were “double-checked” through verification of the originally submitted phenotypic checklist forms and subsequent update of the clinical notes, so data should be highly accurate.

Clinical variability, both inter- and intrafamilial, has been widely reported in the past two decades.<sup>72–74</sup> Although significant progress has been made over the last 20 years, the mechanisms underlying this phenotypic heterogeneity only gradually start to be unraveled. The factors contributing to the phenotypic variability include (1) age dependency of some of the NF1 features,<sup>29,75,76</sup> (2) timing, cell of origin, and number of second hits in specific cells, resulting in presence and number of CALMs, freckling, tibial dysplasia, neurofibromas, and other tumors,<sup>77</sup> (3) post-zygotic mosaicism for the first NF1 hit in mosaic individuals,<sup>77</sup> (4) the enormous NF1 allelic heterogeneity,<sup>78</sup> (5) occasional presence of two different NF1 pathogenic variants segregating within a family (see MAD-R9.232; Table S1 and Figure S5) or the occurrence of two independent mutations, one in NF1 and the other in a different gene, within an individual (see UAB-R624 with the NF1/PTPN11 mutations and UF-R1 with the NF1/KIT mutations; Table S1), (6) modifying genes,<sup>79</sup> and (7) environmental factors (e.g., number of pregnancies).<sup>80</sup> To date, two studies have identified potential modifying genes, unlinked to the NF1 locus, associated with the severity of NF1 presentation.<sup>81,82</sup> Pasmant et al. demonstrated that a high number of plexiform neurofibromas has been significantly associated with allele T of SNP rs2151280 of ANRIL (MIM: 613149).<sup>81</sup> Pemov et al. reported a correlation of two common SNPs (rs4660761 and rs7161), located between DPH2 (MIM: 603456) and ATP6VOB (MIM: 603717), as well as of SNP rs1800934 in MSH6 (MIM: 600678) with the number of CALMs.<sup>82</sup> Further studies are needed to confirm these findings.

Missense mutations affecting NF1 codons 844–848 described in this study are clearly pathogenic and individuals with these missense mutations have a statistically

higher risk of developing spinal neurofibromas, plexiform neurofibromas, and OPGs. Functional studies in mutant mice harboring the missense mutation c.2542G>C (p.Gly848Arg) did not recapitulate this human phenotype, as neither optic pathway gliomas nor plexiform neurofibromas developed.<sup>22,23</sup> Western blot analysis showed that c.2542G>C (p.Gly848Arg) resulted in 38%–50% reduction of neurofibromin levels.<sup>22,23</sup> These mutations reside outside the GRD (amino acids 1,217–1,511), known to have tumor-suppressor activity through downregulation of members of the Ras family of small GTP-binding proteins. Although NF1 was cloned in 1990, the cellular functions performed by this huge 2,818-amino acid multi-domain protein are still incompletely understood. The cluster of recurrent missense mutations involving aa 844–848 described in the current study are located within the CSRD (amino acids 543–909), located N-terminal to the GRD. The CSRD domain, originally described by Fahsold et al.,<sup>83</sup> is likely functionally important, which is further implied by the presence of multiple missense variants in this segment of the gene in NF1-affected individuals. The 3D structure of this region has not been resolved and its precise functions and interactors have not been described. Ras GAP activity is enhanced through phosphorylation by Protein Kinase C $\alpha$  of serine and threonine residues within this domain.<sup>84</sup> Based on the 2D modeling of the CSRD using PredictProtein server,<sup>85</sup> the region 831–847 might form the C-part of a helix and be buried in the protein. Missense mutations affecting codons 844–848, especially those substituting smaller hydrophobic amino acids to large ones, may result in breaking of the helix and exposure of the buried protein domain, consequently affecting the function of the protein. No functional studies confirming the aforementioned bioinformatics analysis have been performed, however. In any case, missense mutations in this region seem to act through a loss-of-function mechanism and not gain-of-function or dominant-negative, at least in melanocytes and JMML. Indeed, the c.2540T>C (p.Leu847Pro) was observed as a “second hit” in one CALM, biopsied from a 13.5-year-old girl with >5 CALMs and skinfold freckling carrying the NF1 constitutional mutation c.5547–1G>A (Table S11), confirming that two hits are required to cause a phenotypic effect. Additionally, we reported a 5-year-old girl with JMML (UAB-R9493; Table S1) who carried two pathogenic NF1 mutations in the blood: c.2542G>A (p.Gly848Arg) as a “first hit” mutation and c.1246C>T (p.Arg416\*) as a “second hit.” There is a need to improve our understanding of the physiological functions of neurofibromin and to determine how each domain regulates the function of this protein.

Six amino acids in the region aa 804–950 are evolutionarily conserved down to yeast (IRA1 and IRA2), Leu844, Gly849, Leu852, Glu924, Leu933, and Phe934 (Figure S6) and would therefore be expected to be of particular functional importance.<sup>86</sup> Only Leu844 and Leu933 have, however, been observed in NF1-affected

individuals to predispose to recurrent missense mutations (HGMD, LOVD, ClinVar, and our cohort). The tumorigenic potential of aa 844 is further highlighted by identification of somatic mutations in the COSMIC database: one glioma with c.2531T>C (p.Leu844Pro), one glioma and four malignant melanomas with c.2530C>T (p.Leu844Phe).

Palindromic structures belong to the non-B DNA structures and are often the site of replication errors resulting in substitutions.<sup>87</sup> The *NF1* missense mutation hotspot (aa 844–848) is located in the highly conserved amino acid region, suggesting that it is functionally important. The genomic sequence encoding the human *NF1* aa 845–853 is a part of two palindromic structures (Figure S7); therefore the high rate of recurrent missense mutations affecting Leu847 and Gly848 may partially be due these being both located in the loop of the palindrome. In *NF1* exon 21 [16], other palindromic nucleotide sequences, specifying the amino acid residues aa 828–832, aa 865–868, aa 908–911, and aa 933–937 are observed, resulting in four additional stem-loop structures. However, these structures do not predispose to recurrent missense mutations as none were found either in the UAB, HGMD, or LOVD cohort, except for c.2798T>C (p.Leu933Pro), whose location does not include the loop of the palindrome. The complex interplay between functional significance and genomic architecture needs to be considered when analyzing the recurrence of mutations.

Although only a few clear genotype-phenotype correlations have been so far reported,<sup>11–14</sup> the data presented here show that additional clinically relevant *NF1* genotype-phenotype correlations exist. A renewed interest in such studies is needed to come to a timely unfolding of additional correlations, as so far only the surface has been scratched. This will require close collaboration between NF1 clinicians and molecular geneticists. The lack of discovery of more specific genotype-phenotype correlations may be partly due to the methodological approach, including lumping mutations in large categories (truncating versus microdeletion, splice, missense mutations).<sup>88,89</sup> Identification of *mutation-specific* genotype-phenotype correlations depends on the dataset size with a large number of individuals, preferentially postpubertal, carrying the *same* non-truncating constitutional mutation, with the associated phenotype recorded in a standardized way. As there are only a limited number of truly recurrent non-truncating mutations, prioritization on individuals carrying such recurrent mutations is indicated. Although each of the recurrent mutation affects only a small percentage of *NF1*-affected individuals (3%–8% with the microdeletion type I, ~0.8% with p.Met992del, ~1.2% with the p.Arg1809 missense mutation, and ~0.8% for the cluster of missense mutations affecting codons 844–848), together they may affect counseling and surveillance in a significant fraction of the *NF1*-affected population.

In conclusion, the present findings indicate that missense mutations affecting one of five neighboring codons 844–848 located outside the GAP-related domain are an important risk factor for a severe phenotype in *NF1*-affected individuals. We report that these individuals have a high prevalence of plexiform and/or spinal neurofibromas, symptomatic and asymptomatic OPGs, malignant neoplasms, and skeletal abnormalities. A severe phenotype was observed in 75% of adult *NF1*-affected individuals with these mutations, clearly demonstrating that missense mutations outside the GRD can be associated with a severe clinical presentation. The current study identified a genotype-phenotype correlation in this region that may be valuable in the management and genetic counseling of a significant number of *NF1*-affected individuals. These data suggest that there is a potential need for increased disease surveillance in individuals with these mutations enabling genotype-driven personalized medicine.

### Supplemental Data

Supplemental Data include 7 figures and 11 tables and can be found with this article online at <https://doi.org/10.1016/j.ajhg.2017.12.001>.

### Acknowledgments

We thank the individuals and their families for participating in this study. This work was supported by the Children's Tumor Foundation by the Isaac and Sadie Fuchs Genotype-Phenotype Study (to L.M.M.) and by internal funds from the Medical Genomics Laboratory at UAB. Parts of this work were presented during the 17<sup>th</sup> European Neurofibromatosis Meeting (September 8–11, 2016, Padova-Abano Terme, Italy) and the Children's Tumor Foundation NF Conference (June 10–13, 2017, Washington, DC, USA).

M.K. is also affiliated with the Department of Biology and Medical Genetics at the Medical University of Gdansk in Poland. D.G.R.E. is supported by the all Manchester NIHR Biomedical Research Centre as an NIHR Senior investigator. M.U. acknowledges Sheila Palmer-Smith and Ian Frayling for their support.

Received: August 8, 2017

Accepted: November 30, 2017

Published: December 28, 2017

### Web Resources

1000 Genomes, <http://www.internationalgenome.org/>  
CADD, <http://cadd.gs.washington.edu/>  
ClinVar, <https://www.ncbi.nlm.nih.gov/clinvar/>  
Clustal, <http://www.clustal.org/clustal2/>  
COSMIC, <http://cancer.sanger.ac.uk/cosmic>  
dbSNP, <https://www.ncbi.nlm.nih.gov/projects/SNP/>  
GenBank, <https://www.ncbi.nlm.nih.gov/genbank/>  
GeneReviews, Friedman, J.M. (2014). Neurofibromatosis 1. <http://www.ncbi.nlm.nih.gov/books/NBK1109>  
gnomAD Browser, <http://gnomad.broadinstitute.org/>  
GraphPad, <https://www.graphpad.com/>

HGMD, <http://www.hgmd.cf.ac.uk/ac/index.php>  
 HGVS, <http://varnomen.hgvs.org>  
 LOVD, <https://databases.lovd.nl/shared/genes/NF1>  
 NHLBI Exome Sequencing Project (ESP) Exome Variant Server,  
<http://evs.gs.washington.edu/EVS/>  
 OMIM, <http://www.omim.org/>  
 Palindrome search, <http://bioinfo.cs.technion.ac.il/projects/Engel-Freund/new.html>  
 PolyPhen-2, <http://genetics.bwh.harvard.edu/pph2/>  
 QGRS Mapper, <http://bioinformatics.ramapo.edu/QGRS/index.php>  
 SIFT, <http://sift.bii.a-star.edu.sg/>  
 VassarStats, <http://vassarstats.net>

## References

- Lammert, M., Friedman, J.M., Kluwe, L., and Mautner, V.F. (2005). Prevalence of neurofibromatosis 1 in German children at elementary school enrollment. *Arch. Dermatol.* *141*, 71–74.
- Evans, D.G., Howard, E., Giblin, C., Clancy, T., Spencer, H., Huson, S.M., and Laloo, F. (2010). Birth incidence and prevalence of tumor-prone syndromes: estimates from a UK family genetic register service. *Am. J. Med. Genet. A.* *152A*, 327–332.
- Uusitalo, E., Leppävirta, J., Koffert, A., Suominen, S., Vahtera, J., Vahlberg, T., Pöyhönen, M., Peltonen, J., and Peltonen, S. (2015). Incidence and mortality of neurofibromatosis: a total population study in Finland. *J. Invest. Dermatol.* *135*, 904–906.
- Ballester, R., Marchuk, D., Boguski, M., Saulino, A., Letcher, R., Wigler, M., and Collins, F. (1990). The NF1 locus encodes a protein functionally related to mammalian GAP and yeast IRA proteins. *Cell* *63*, 851–859.
- DeClue, J.E., Cohen, B.D., and Lowy, D.R. (1991). Identification and characterization of the neurofibromatosis type 1 protein product. *Proc. Natl. Acad. Sci. USA* *88*, 9914–9918.
- Peltonen, S., and Pöyhönen, M. (2012). Clinical diagnosis and atypical forms of NF1. In *Neurofibromatosis Type 1. Molecular and Cellular Biology*, M. Upadhyaya and D.N. Cooper, eds. (Springer-Verlag Berlin Heidelberg), pp. 17–30.
- Huson, S.M., Harper, P.S., and Compston, D.A. (1988). Von Recklinghausen neurofibromatosis. A clinical and population study in south-east Wales. *Brain* *111*, 1355–1381.
- National Institutes of Health Consensus Development Conference (1988). Neurofibromatosis. Conference statement. *Arch. Neurol.* *45*, 575–578.
- Brems, H., Chmara, M., Sahbatou, M., Denayer, E., Taniguchi, K., Kato, R., Somers, R., Messiaen, L., De Schepper, S., Fryns, J.P., et al. (2007). Germline loss-of-function mutations in SPRED1 cause a neurofibromatosis 1-like phenotype. *Nat. Genet.* *39*, 1120–1126.
- Messiaen, L., Yao, S., Brems, H., Callens, T., Sathienkijanchai, A., Denayer, E., Spencer, E., Arn, P., Babovic-Vuksanovic, D., Bay, C., et al. (2009). Clinical and mutational spectrum of neurofibromatosis type 1-like syndrome. *JAMA* *302*, 2111–2118.
- Kehrer-Sawatzki, H., Mautner, V.F., and Cooper, D.N. (2017). Emerging genotype-phenotype relationships in patients with large NF1 deletions. *Hum. Genet.* *136*, 349–376.
- Upadhyaya, M., Huson, S.M., Davies, M., Thomas, N., Chuzhanova, N., Giovannini, S., Evans, D.G., Howard, E., Kerr, B., Griffiths, S., et al. (2007). An absence of cutaneous neurofibromas associated with a 3-bp inframe deletion in exon 17 of the NF1 gene (c.2970-2972 delAAT): evidence of a clinically significant NF1 genotype-phenotype correlation. *Am. J. Hum. Genet.* *80*, 140–151.
- Pinna, V., Lanari, V., Daniele, P., Consoli, F., Agolini, E., Margiotti, K., Bottillo, I., Torrente, I., Bruselles, A., Fusilli, C., et al. (2015). p.Arg1809Cys substitution in neurofibromin is associated with a distinctive NF1 phenotype without neurofibromas. *Eur. J. Hum. Genet.* *23*, 1068–1071.
- Rojnueangnit, K., Xie, J., Gomes, A., Sharp, A., Callens, T., Chen, Y., Liu, Y., Cochran, M., Abbott, M.A., Atkin, J., et al. (2015). High incidence of Noonan syndrome features including short stature and pulmonic stenosis in patients carrying NF1 missense mutations affecting p.Arg1809: genotype-phenotype correlation. *Hum. Mutat.* *36*, 1052–1063.
- Pulst, S.M., Riccardi, V.M., Fain, P., and Korenberg, J.R. (1991). Familial spinal neurofibromatosis: clinical and DNA linkage analysis. *Neurology* *41*, 1923–1927.
- Burkitt Wright, E.M., Sach, E., Sharif, S., Quarrell, O., Carroll, T., Whitehouse, R.W., Upadhyaya, M., Huson, S.M., and Evans, D.G.R. (2013). Can the diagnosis of NF1 be excluded clinically? A lack of pigmentary findings in families with spinal neurofibromatosis demonstrates a limitation of clinical diagnosis. *J. Med. Genet.* *50*, 606–613.
- Ruggieri, M., Polizzi, A., Spalice, A., Salpietro, V., Caltabiano, R., D’Orazi, V., Pavone, P., Pirrone, C., Magro, G., Platania, N., et al. (2015). The natural history of spinal neurofibromatosis: a critical review of clinical and genetic features. *Clin. Genet.* *87*, 401–410.
- Kluwe, L., Tatagiba, M., Fünsterer, C., and Mautner, V.F. (2003). NF1 mutations and clinical spectrum in patients with spinal neurofibromas. *J. Med. Genet.* *40*, 368–371.
- Messiaen, L., Riccardi, V., Peltonen, J., Maertens, O., Callens, T., Karvonen, S.L., Leisti, E.L., Koivunen, J., Vandenbroucke, I., Stephens, K., and Pöyhönen, M. (2003). Independent NF1 mutations in two large families with spinal neurofibromatosis. *J. Med. Genet.* *40*, 122–126.
- Upadhyaya, M., Spurlock, G., Kluwe, L., Chuzhanova, N., Bennett, E., Thomas, N., Guha, A., and Mautner, V. (2009). The spectrum of somatic and germline NF1 mutations in NF1 patients with spinal neurofibromas. *Neurogenetics* *10*, 251–263.
- Pascual-Castroviejo, I., Pascual-Pascual, S.I., Velazquez-Fragua, R., Botella, P., and Viaño, J. (2007). Familial spinal neurofibromatosis. *Neuropediatrics* *38*, 105–108.
- Li, K., Turner, A.N., Chen, M., Brosius, S.N., Schoeb, T.R., Messiaen, L.M., Bedwell, D.M., Zinn, K.R., Anastasaki, C., Gutmann, D.H., et al. (2016). Mice with missense and nonsense NF1 mutations display divergent phenotypes compared with human neurofibromatosis type I. *Dis. Model. Mech.* *9*, 759–767.
- Toonen, J.A., Anastasaki, C., Smithson, L.J., Gianino, S.M., Li, K., Kesterson, R.A., and Gutmann, D.H. (2016). NF1 germline mutation differentially dictates optic glioma formation and growth in neurofibromatosis-1. *Hum. Mol. Genet.* *25*, 1703–1713.
- Nellhaus, G. (1968). Head circumference from birth to eighteen years. Practical composite international and interracial graphs. *Pediatrics* *41*, 106–114.
- Nyström, A.M., Ekvall, S., Strömberg, B., Holmström, G., Thuresson, A.C., Annerén, G., and Bondeson, M.L. (2009). A severe form of Noonan syndrome and autosomal dominant café-au-lait spots - evidence for different genetic origins. *Acta Paediatr.* *98*, 693–698.

26. Ekvall, S., Sjörs, K., Jonzon, A., Vihinen, M., Annerén, G., and Bondeson, M.L. (2014). Novel association of neurofibromatosis type 1-causing mutations in families with neurofibromatosis-Noonan syndrome. *Am. J. Med. Genet. A*. 164A, 579–587.
27. Santoro, C., Maietta, A., Giugliano, T., Melis, D., Perrotta, S., Nigro, V., and Piluso, G. (2015). Arg<sup>(1809)</sup> substitution in neurofibromin: further evidence of a genotype-phenotype correlation in neurofibromatosis type 1. *Eur. J. Hum. Genet.* 23, 1460–1461.
28. Huson, S.M., Compston, D.A., Clark, P., and Harper, P.S. (1989a). A genetic study of von Recklinghausen neurofibromatosis in south east Wales. I. Prevalence, fitness, mutation rate, and effect of parental transmission on severity. *J. Med. Genet.* 26, 704–711.
29. Huson, S.M., Compston, D.A., and Harper, P.S. (1989b). A genetic study of von Recklinghausen neurofibromatosis in south east Wales. II. Guidelines for genetic counselling. *J. Med. Genet.* 26, 712–721.
30. Listerick, R., Charrow, J., Greenwald, M., and Mets, M. (1994). Natural history of optic pathway tumors in children with neurofibromatosis type 1: a longitudinal study. *J. Pediatr.* 125, 63–66.
31. Van Es, S., North, K.N., McHugh, K., and De Silva, M. (1996). MRI findings in children with neurofibromatosis type 1: a prospective study. *Pediatr. Radiol.* 26, 478–487.
32. Friedman, J.M., and Birch, P.H. (1997). Type 1 neurofibromatosis: a descriptive analysis of the disorder in 1,728 patients. *Am. J. Med. Genet.* 70, 138–143.
33. Cnossen, M.H., de Goede-Bolder, A., van den Broek, K.M., Waasdorp, C.M., Oranje, A.P., Stroink, H., Simonsz, H.J., van den Ouweland, A.M., Halley, D.J., and Niermeijer, M.F. (1998). A prospective 10 year follow up study of patients with neurofibromatosis type 1. *Arch. Dis. Child.* 78, 408–412.
34. McGaughan, J.M., Harris, D.I., Donnai, D., Teare, D., MacLeod, R., Westerbeek, R., Kingston, H., Super, M., Harris, R., and Evans, D.G. (1999). A clinical study of type 1 neurofibromatosis in north west England. *J. Med. Genet.* 36, 197–203.
35. Thakkar, S.D., Feigen, U., and Mautner, V.F. (1999). Spinal tumours in neurofibromatosis type 1: an MRI study of frequency, multiplicity and variety. *Neuroradiology* 41, 625–629.
36. Lin, A.E., Birch, P.H., Korf, B.R., Tenconi, R., Niimura, M., Poyhonen, M., Armfield Uhas, K., Sigorini, M., Virdis, R., Romano, C., et al. (2000). Cardiovascular malformations and other cardiovascular abnormalities in neurofibromatosis 1. *Am. J. Med. Genet.* 95, 108–117.
37. Blazo, M.A., Lewis, R.A., Chintagumpala, M.M., Frazier, M., McCluggage, C., and Plon, S.E. (2004). Outcomes of systematic screening for optic pathway tumors in children with Neurofibromatosis Type 1. *Am. J. Med. Genet. A*. 127A, 224–229.
38. Khosrotehrani, K., Bastuji-Garin, S., Riccardi, V.M., Birch, P., Friedman, J.M., and Wolkenstein, P. (2005). Subcutaneous neurofibromas are associated with mortality in neurofibromatosis 1: a cohort study of 703 patients. *Am. J. Med. Genet. A*. 132A, 49–53.
39. Plotkin, S.R., Bredella, M.A., Cai, W., Kassarijan, A., Harris, G.J., Esparza, S., Merker, V.L., Munn, L.L., Muzikansky, A., Askenazi, M., et al. (2012). Quantitative assessment of whole-body tumor burden in adult patients with neurofibromatosis. *PLoS ONE* 7, e35711.
40. Blanchard, G., Lafforgue, M.P., Lion-François, L., Kemlin, I., Rodriguez, D., Castelnaud, P., Carneiro, M., Meyer, P., Rivier, F., Barbarot, S., Chaix, Y.; and NF France network (2016). Systematic MRI in NF1 children under six years of age for the diagnosis of optic pathway gliomas. Study and outcome of a French cohort. *Eur. J. Paediatr. Neurol.* 20, 275–281.
41. Messiaen, L.M., Callens, T., Mortier, G., Beysen, D., Vandenbroucke, I., Van Roy, N., Speleman, F., and Papee, A.D. (2000). Exhaustive mutation analysis of the NF1 gene allows identification of 95% of mutations and reveals a high frequency of unusual splicing defects. *Hum. Mutat.* 15, 541–555.
42. Messiaen, L.M., and Wimmer, K. (2012). Mutation analysis of the NF1 gene by cDNA-based sequencing of the coding region. In *Advances in Neurofibromatosis Research*, K.S.G. Cunha and M. Geller, eds. (Nova Science Publishers, Inc.), pp. 89–108.
43. Richards, S., Aziz, N., Bale, S., Bick, D., Das, S., Gastier-Foster, J., Grody, W.W., Hegde, M., Lyon, E., Spector, E., et al.; ACMG Laboratory Quality Assurance Committee (2015). Standards and guidelines for the interpretation of sequence variants: a joint consensus recommendation of the American College of Medical Genetics and Genomics and the Association for Molecular Pathology. *Genet. Med.* 17, 405–424.
44. Zhou, X., Edmonson, M.N., Wilkinson, M.R., Patel, A., Wu, G., Liu, Y., Li, Y., Zhang, Z., Rusch, M.C., Parker, M., et al. (2016). Exploring genomic alteration in pediatric cancer using ProteinPaint. *Nat. Genet.* 48, 4–6.
45. Cunha, K.S., Oliveira, N.S., Fausto, A.K., de Souza, C.C., Gros, A., Bandres, T., Idrissi, Y., Merlio, J.-P., de Moura Neto, R.S., Silva, R., et al. (2016). Hybridization capture-based next-generation sequencing to evaluate coding sequence and deep intronic mutations in the NF1 gene. *Genes (Basel)* 7, 133.
46. Bertola, D.R., Pereira, A.C., Passetti, F., de Oliveira, P.S., Messiaen, L., Gelb, B.D., Kim, C.A., and Krieger, J.E. (2005). Neurofibromatosis-Noonan syndrome: molecular evidence of the concurrence of both disorders in a patient. *Am. J. Med. Genet. A*. 136, 242–245.
47. Tonsgard, J.H., Kwak, S.M., Short, M.P., and Dachman, A.H. (1998). CT imaging in adults with neurofibromatosis-1: frequent asymptomatic plexiform lesions. *Neurology* 50, 1755–1760.
48. Waggoner, D.J., Towbin, J., Gottesman, G., and Gutmann, D.H. (2000). Clinic-based study of plexiform neurofibromas in neurofibromatosis 1. *Am. J. Med. Genet.* 92, 132–135.
49. Ferner, R.E., Huson, S.M., Thomas, N., Moss, C., Willshaw, H., Evans, D.G., Upadhyaya, M., Towers, R., Gleeson, M., Steiger, C., and Kirby, A. (2007). Guidelines for the diagnosis and management of individuals with neurofibromatosis 1. *J. Med. Genet.* 44, 81–88.
50. Duong, T.A., Sbidian, E., Valeyrie-Allanore, L., Vialette, C., Ferkal, S., Hadj-Rabia, S., Glorion, C., Lyonnet, S., Zerah, M., Kemlin, I., et al. (2011). Mortality associated with neurofibromatosis 1: a cohort study of 1895 patients in 1980-2006 in France. *Orphanet J. Rare Dis.* 6, 18.
51. Evans, D.G., Baser, M.E., McGaughan, J., Sharif, S., Howard, E., and Moran, A. (2002). Malignant peripheral nerve sheath tumours in neurofibromatosis 1. *J. Med. Genet.* 39, 311–314.
52. Tucker, T., Wolkenstein, P., Revuz, J., Zeller, J., and Friedman, J.M. (2005). Association between benign and malignant peripheral nerve sheath tumors in NF1. *Neurology* 65, 205–211.
53. McCaughan, J.A., Holloway, S.M., Davidson, R., and Lam, W.W. (2007). Further evidence of the increased risk for



- malignant peripheral nerve sheath tumour from a Scottish cohort of patients with neurofibromatosis type 1. *J. Med. Genet.* 44, 463–466.
54. Korf, B.R. (1999). Plexiform neurofibromas. *Am. J. Med. Genet.* 89, 31–37.
  55. Prada, C.E., Rangwala, F.A., Martin, L.J., Lovell, A.M., Saal, H.M., Schorry, E.K., and Hopkin, R.J. (2012). Pediatric plexiform neurofibromas: impact on morbidity and mortality in neurofibromatosis type 1. *J. Pediatr.* 160, 461–467.
  56. Jahraus, C.D., and Tarbell, N.J. (2006). Optic pathway gliomas. *Pediatr. Blood Cancer* 46, 586–596.
  57. Listernick, R., Ferner, R.E., Liu, G.T., and Gutmann, D.H. (2007). Optic pathway gliomas in neurofibromatosis-1: controversies and recommendations. *Ann. Neurol.* 61, 189–198.
  58. Nicolin, G., Parkin, P., Mabbott, D., Hargrave, D., Bartels, U., Tabori, U., Rutka, J., Buncic, J.R., and Bouffet, E. (2009). Natural history and outcome of optic pathway gliomas in children. *Pediatr. Blood Cancer* 53, 1231–1237.
  59. Rasmussen, S.A., and Friedman, J.M. (2000). NF1 gene and neurofibromatosis 1. *Am. J. Epidemiol.* 151, 33–40.
  60. Uusitalo, E., Rantanen, M., Kallionpää, R.A., Pöyhönen, M., Leppävirta, J., Ylä-Outinen, H., Riccardi, V.M., Pukkala, E., Pitkäniemi, J., Peltonen, S., and Peltonen, J. (2016). Distinctive cancer associations in patients with neurofibromatosis type 1. *J. Clin. Oncol.* 34, 1978–1986.
  61. Brems, H., Beert, E., de Ravel, T., and Legius, E. (2009). Mechanisms in the pathogenesis of malignant tumours in neurofibromatosis type 1. *Lancet Oncol.* 10, 508–515.
  62. Patil, S., and Chamberlain, R.S. (2012). Neoplasms associated with germline and somatic NF1 gene mutations. *Oncologist* 17, 101–116.
  63. Sung, L., Anderson, J.R., Arndt, C., Raney, R.B., Meyer, W.H., and Pappo, A.S. (2004). Neurofibromatosis in children with Rhabdomyosarcoma: a report from the Intergroup Rhabdomyosarcoma study IV. *J. Pediatr.* 144, 666–668.
  64. Crucis, A., Richer, W., Brugières, L., Bergeron, C., Marie-Cardine, A., Stephan, J.L., Girard, P., Corradini, N., Munzer, M., Lacour, B., et al. (2015). Rhabdomyosarcomas in children with neurofibromatosis type I: A national historical cohort. *Pediatr. Blood Cancer* 62, 1733–1738.
  65. Chang, T., and Shannon, K. (2012). NF1 mutations in hematologic cancers. In *Neurofibromatosis Type 1. Molecular and Cellular Biology*, M. Upadhyaya and D.N. Cooper, eds. (Springer-Verlag Berlin Heidelberg), pp. 469–485.
  66. Seminog, O.O., and Goldacre, M.J. (2013). Risk of benign tumours of nervous system, and of malignant neoplasms, in people with neurofibromatosis: population-based record-linkage study. *Br. J. Cancer* 108, 193–198.
  67. McPherson, J.R., Ong, C.K., Ng, C.C., Rajasegaran, V., Heng, H.L., Yu, W.S., Tan, B.K., Madhukumar, P., Teo, M.C., Ngeow, J., et al. (2015). Whole-exome sequencing of breast cancer, malignant peripheral nerve sheath tumor and neurofibroma from a patient with neurofibromatosis type 1. *Cancer Med.* 4, 1871–1878.
  68. Stevenson, D.A., and Yang, F.C. (2011). The musculoskeletal phenotype of the RASopathies. *Am. J. Med. Genet. C. Semin. Med. Genet.* 157C, 90–103.
  69. Vargiami, E., Zafeiriou, D.I., and Bantouraki, M. (2004). Ulnar hypoplasia and neurofibromatosis type I. *J. Pediatr.* 145, 859.
  70. Krab, L.C., de Goede-Bolder, A., Aarsen, F.K., Pluijm, S.M., Bouman, M.J., van der Geest, J.N., Lequin, M., Catsman, C.E., Arts, W.F., Kushner, S.A., et al. (2008). Effect of simvastatin on cognitive functioning in children with neurofibromatosis type 1: a randomized controlled trial. *JAMA* 300, 287–294.
  71. Mautner, V.F., Kluwe, L., Friedrich, R.E., Roehl, A.C., Bammert, S., Högel, J., Spöri, H., Cooper, D.N., and Kreher-Sawatzki, H. (2010). Clinical characterisation of 29 neurofibromatosis type-1 patients with molecularly ascertained 1.4 Mb type-1 NF1 deletions. *J. Med. Genet.* 47, 623–630.
  72. Easton, D.F., Ponder, M.A., Huson, S.M., and Ponder, B.A. (1993). An analysis of variation in expression of neurofibromatosis (NF) type 1 (NF1): evidence for modifying genes. *Am. J. Hum. Genet.* 53, 305–313.
  73. Szudek, J., Joe, H., and Friedman, J.M. (2002). Analysis of intrafamilial phenotypic variation in neurofibromatosis 1 (NF1). *Genet. Epidemiol.* 23, 150–164.
  74. Sabbagh, A., Pasmant, E., Laurendeau, I., Parfait, B., Barbarot, S., Guillot, B., Combemale, P., Ferkal, S., Vidaud, M., Aubourg, P., et al.; members of the NF France Network (2009). Unraveling the genetic basis of variable clinical expression in neurofibromatosis 1. *Hum. Mol. Genet.* 18, 2768–2778.
  75. DeBella, K., Szudek, J., and Friedman, J.M. (2000). Use of the national institutes of health criteria for diagnosis of neurofibromatosis 1 in children. *Pediatrics* 105, 608–614.
  76. Williams, V.C., Lucas, J., Babcock, M.A., Gutmann, D.H., Korf, B., and Maria, B.L. (2009). Neurofibromatosis type 1 revisited. *Pediatrics* 123, 124–133.
  77. Messiaen, L., and Xie, J. (2012). NF1 germline and somatic mosaicism. In *Neurofibromatosis Type 1. Molecular and Cellular Biology*, M. Upadhyaya and D.N. Cooper, eds. (Springer-Verlag Berlin Heidelberg), pp. 151–172.
  78. Messiaen, L.M., and Wimmer, K. (2008). NF1 mutational spectrum. In *Neurofibromatoses*, D. Kaufmann, ed. (Monogr. Hum. Genet. Basel: Karger), pp. 63–77.
  79. Pasmant, E., Vidaud, D., and Wolkenstein, P. (2012). Modifier genes in NF1. In *Neurofibromatosis Type 1. Molecular and Cellular Biology*, M. Upadhyaya and D.N. Cooper, eds. (Springer-Verlag Berlin Heidelberg), pp. 269–285.
  80. Terry, A.R., Barker, F.G., 2nd, Leffert, L., Bateman, B.T., Souter, I., and Plotkin, S.R. (2013). Neurofibromatosis type 1 and pregnancy complications: a population-based study. *Am. J. Obstet. Gynecol.* 209, 46.e1–46.e8.
  81. Pasmant, E., Sabbagh, A., Vidaud, M., and Bièche, I. (2011). ANRIL, a long, noncoding RNA, is an unexpected major hotspot in GWAS. *FASEB J.* 25, 444–448.
  82. Pemov, A., Sung, H., Hyland, P.L., Sloan, J.L., Ruppert, S.L., Baldwin, A.M., Boland, J.F., Bass, S.E., Lee, H.J., Jones, K.M., et al.; NISC Comparative Sequencing Program (2014). Genetic modifiers of neurofibromatosis type 1-associated café-au-lait macule count identified using multi-platform analysis. *PLoS Genet.* 10, e1004575.
  83. Fahsold, R., Hoffmeyer, S., Mischung, C., Gille, C., Ehlers, C., Küçükceylan, N., Abdel-Nour, M., Gewies, A., Peters, H., Kaufmann, D., et al. (2000). Minor lesion mutational spectrum of the entire NF1 gene does not explain its high mutability but points to a functional domain upstream of the GAP-related domain. *Am. J. Hum. Genet.* 66, 790–818.
  84. Mangoura, D., Sun, Y., Li, C., Singh, D., Gutmann, D.H., Flores, A., Ahmed, M., and Vallianatos, G. (2006). Phosphorylation of neurofibromin by PKC is a possible molecular switch in EGF receptor signaling in neural cells. *Oncogene* 25, 735–745.
  85. Rost, B., Yachdav, G., and Liu, J. (2004). The PredictProtein server. *Nucleic Acids Res.* 32, W321–6.



86. Ng, P.C., and Henikoff, S. (2001). Predicting deleterious amino acid substitutions. *Genome Res.* 11, 863–874.
87. Kamat, M.A., Bacolla, A., Cooper, D.N., and Chuzhanova, N. (2016). A role for non-B DNA forming sequences in mediating microlesions causing human inherited disease. *Hum. Mutat.* 37, 65–73.
88. Sabbagh, A., Pasmant, E., Imbard, A., Luscan, A., Soares, M., Blanché, H., Laurendeau, I., Ferkal, S., Vidaud, M., Pinson, S., et al. (2013). NF1 molecular characterization and neurofibromatosis type I genotype-phenotype correlation: the French experience. *Hum. Mutat.* 34, 1510–1518.
89. van Minkelen, R., van Bever, Y., Kromosoeto, J.N., Withagen-Hermans, C.J., Nieuwlaat, A., Halley, D.J., and van den Ouweland, A.M. (2014). A clinical and genetic overview of 18 years neurofibromatosis type 1 molecular diagnostics in the Netherlands. *Clin. Genet.* 85, 318–327.

## Supplemental Data

### **Genotype-Phenotype Correlation in NF1: Evidence for a More Severe Phenotype Associated with Missense Mutations Affecting *NF1* Codons 844–848**

Magdalena Koczkowska, Yunjia Chen, Tom Callens, Alicia Gomes, Angela Sharp, Sherrell Johnson, Meng-Chang Hsiao, Zhenbin Chen, Meena Balasubramanian, Christopher P. Barnett, Troy A. Becker, Shay Ben-Shachar, Debora R. Bertola, Jaishri O. Blakeley, Emma M.M. Burkitt-Wright, Alison Callaway, Melissa Crenshaw, Karin S. Cunha, Mitch Cunningham, Maria D. D'Agostino, Karin Dahan, Alessandro De Luca, Anne Destrée, Radhika Dhamija, Marica Eoli, D. Gareth R. Evans, Patricia Galvin-Parton, Jaya K. George-Abraham, Karen W. Gripp, Jose Guevara-Campos, Neil A. Hanchard, Concepcion Hernández-Chico, LaDonna Immken, Sandra Janssens, Kristi J. Jones, Beth A. Keena, Aaina Kochhar, Jan Liebelt, Arelis Martir-Negron, Maurice J. Mahoney, Isabelle Maystadt, Carey McDougall, Meriel McEntagart, Nancy Mendelsohn, David T. Miller, Geert Mortier, Jenny Morton, John Pappas, Scott R. Plotkin, Dinél Pond, Kenneth Rosenbaum, Karol Rubin, Laura Russell, Lane S. Rutledge, Veronica Saletti, Rhonda Schonberg, Allison Schreiber, Meredith Seidel, Elizabeth Siqveland, David W. Stockton, Eva Trevisson, Nicole J. Ullrich, Meena Upadhyaya, Rick van Minkelen, Helene Verhelst, Margaret R. Wallace, Yoon-Sim Yap, Elaine Zackai, Jonathan Zonana, Vickie Zurcher, Kathleen Claes, Yolanda Martin, Bruce R. Korf, Eric Legius, and Ludwine M. Messiaen

MEDICAL GENOMICS LABORATORY: *NF1/SPRED1* PHENOTYPIC CHECKLIST FORM

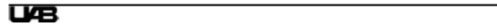

Patient ID: \_\_\_\_\_ Referring Physician: \_\_\_\_\_ Date of Exam: \_\_/\_\_/\_\_

**DEMOGRAPHIC INFORMATION**

Gender:  Male  Female Date of Birth: \_\_/\_\_/\_\_

Ethnicity: Mother:  White  Black  Native American  Hispanic  Asian  Other:  White  Black  Native American  Hispanic  Asian  Other:

**DIAGNOSIS**

NIH criteria:  >6 CAL spots >5mm, postpubertal >15mm  Otic glioma  
 >2 neurofibromas or 1 plexiform NF  >2 Lisch nodules  
 Axillary or inguinal freckling  A distinct osseous lesion  
 First degree relative diagnosed with NF1 by above criteria  
 Does patient fulfill NIH diagnostic criteria for NF1?  Yes  No

Clinical diagnosis:  NF1  Multiple CAL spots  Familial multiple CAL spots  
 Spinal NF  Isolated neurofibromas  Segmental NF1  
 NF Noonan  Single NF1 feature  Watson Syndrome  
 Legius syndrome  Unknown

Family history:  Sporadic (proband is a "founder")  Familial (proband is a "non-founder")  Unknown  
 Consanguinity:  Yes  No  Unknown

**GENERAL INFORMATION**

Height: \_\_\_\_ cm Head circumference: \_\_\_\_ cm Weight: \_\_\_\_ kg

**NF SIGNS AND SYMPTOMS**

1) **CAL spots:**  0  1-5  >6 to 100  >100  
 General impression on the borders of the CAL-spots:  
 typical well-defined smooth borders diameter: \_\_\_\_\_  
 irregular margins, ragged borders  
 for detail on size and location of the CAL-spots and other hyperpigmentation areas: page 3.

2) **Skin fold freckling:**  None  Left  Right  Unknown  
 Comments (e.g. very faint,....): \_\_\_\_\_  
 Groin  Axilla  Submammary

3) **Lisch nodules:**  None  Left  Right  Unknown

4) **Cutaneous neurofibromas (soft nodules that project above the skin):** histopathologically confirmed: Y / N

0  2-6  6-99  100-500  >500

5) **Intradermal neurofibromas (soft depression within the skin w/ pinkish overlying discoloration):** histopathologically confirmed: Y / N

0  2-6  6-99  100-500  >500

6) **Subdermal neurofibromas (firm nodules palpable underneath the skin):** histopathologically confirmed: Y / N

0  2-6  6-99  100-500  >500

MEDICAL GENOMICS LABORATORY: *NF1/SPRED1* PHENOTYPIC CHECKLIST FORM

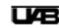

7) **Plexiform neurofibromas:** histopathologically confirmed: Y / N

None  visible from outside  with hyperpigmentation  
 internal  without hyperpigmentation

Head  Neck  Trunk  L Arm  L Hand  L Leg  L Foot  
 Abdomen  Pelvis  Genital area  R Arm  R Hand  R Leg  R Foot

8) **Spinal neurofibromas (neurofibromas arising from the spinal nerve root):** histopathologically confirmed: Y / N

Unknown  Absent by MRI  Present, asymptomatic  
 Present, symptomatic

If present: please provide detail on figure page 4  
 unilateral or  bilateral;  
 C: \_\_\_\_ T: \_\_\_\_ L: \_\_\_\_ S: \_\_\_\_ regions.

9) **Optic glioma:**

Unknown  Absent by MRI  Familial multiple CAL spots  
 Present by MRI, asymptomatic  Present by MRI, symptomatic  
 Nerve (L and/or R)  Chiasm  
 Present by MRI, asymptomatic  Nerve (L and/or R)  Chiasm

10) **Other neoplasms:**

None  Hypothalamic glioma  Brainstem glioma  Other glioma  
 MPNST  JNML  Rhabdomyosarcoma  
 Pheochromocytoma  Colonic polyps  Lipoma  
 Juvenile xanthogranuloma  Breast cancer  
 schwannoma  Other, specify: \_\_\_\_\_

11) **Skeletal Abnormalities:**

None  Long bone dysplasia  Pseudoarthrosis  Sphenoid wing dysplasia  
 Bone cysts  scoliosis  Dysplastic vertebrae  
 pectus excavatum  pectus carinatum  Other: \_\_\_\_\_

12) **Cardiovascular disease:**

Absent  Unknown  Present:  
 Hypertension  Pulmonic stenosis  Aortic stenosis  
 Renal artery stenosis  Moya moya  ASD  
 VSD  Other: \_\_\_\_\_

13) **Development:**

Normal  Exam not done  
 Abnormal  ADD  Hyperactivity  Learning disability  
 speech delay  autism  pervasive developmental delay  
 IQ: Full scale: \_\_\_\_\_ Verbal: \_\_\_\_\_ Performance: \_\_\_\_\_

14) **Education:**

Too young for school  At or above age level  Below age level  Unknown  
 HS completion  College graduate  Higher degree

MEDICAL GENOMICS LABORATORY: *NF1/SPRED1* PHENOTYPIC CHECKLIST FORM

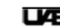

15) **Noonan phenotype:**

Absent  Possible  Unknown  
 Present:  Short stature  Low set ears  Pulmonic Stenosis  
 Hypertelorism  Webbed neck  peak jet velocity \_\_\_\_ m/s  
 Midface hypoplasia  peak gradient \_\_\_\_ mmHg across pulmonic valve  
 PTPN11 testing done? Result: \_\_\_\_\_

16) **Segmental NF phenotype:**  Absent  Possible

location/size of pigmentary lesions and/or neurofibromas

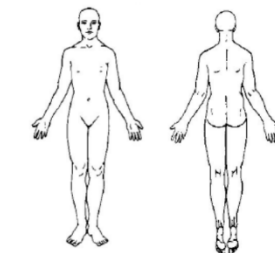

Indicate size and location of  
 Neurofibromas   
 CAL-spots   
 Freckling   
 Hyperpigmented region

17) **location of spinal tumors (if present)**

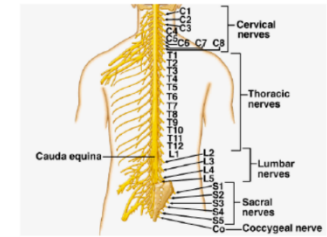

18) **any other comments/remarks:**

Figure S1. Standardized phenotypic checklist used to document the phenotype of the individuals included in this study.



**Figure S2.** The spectrum of missense mutations in the exon 21 [16] of *NF1* (codons 804-950): a comparison of variants deposited in the publicly available disease databases (LOVD, ClinVar and HGMD, as of 05/09/2017) and variants identified in ~8400 unrelated individuals from UAB cohort.

All individuals identified in UAB cohort had been analyzed using comprehensive *NF1* mutation analysis using a core RNA-based approach and MLPA as previously described.<sup>1,2</sup> The variants reported in UAB cohort were classified according to the ACMG recommendations.<sup>3</sup> The classifications of the variants deposited in the publicly available databases (LOVD, ClinVar and HGMD) are shown here as reported by the original author(s). Additionally, the evidence provided in the original publications for those variants deposited in the HGMD database were reviewed and re-classified, if needed, based on currently accepted criteria for pathogenicity.<sup>3</sup>

#### **HGMD re-verification:**

**c.2514C>G (p.Ile838Met)** - reported in 1/91 unrelated *NF1* individuals fulfilling the NIH diagnostic criteria, also carrying the second *NF1* variant c.2531T>C (p.Leu844Pro); no phenotypic details available; no evidence for pathogenicity provided (Mattocks et al.<sup>4</sup>); **c.2509T>C (p.Trp837Arg)**, **c.2585C>G (p.Thr862Ser)**, **c.2606C>T (p.Pro869Leu)**, **c.2798T>A (p.Leu933Gln)** - absence in normal controls, segregation studies, proven *de novo* with paternity confirmation, *in silico* analysis (van Minkelen et al.<sup>5</sup>); **c.2509T>G (p.Trp837Gly)**, **c.2617C>G (p.Arg873Gly)**, **c.2638G>A (p.Val880Met)**, **c.2684T>G (p.Met895Arg)** - no evidence for pathogenicity provided by the original author(s) (Sabbagh et al.<sup>6</sup> and Pasmant et al.<sup>7</sup>); **c.2693T>C (p.Leu898Pro)** - reported once in sporadic case of 465 unrelated *NF1* individuals; no phenotypic details available; no evidence for pathogenicity provided (Maynard et al.<sup>8</sup>); **c.2759T>C (p.Leu920Pro)** - reported once in sporadic case of 17 unrelated *NF1* individuals; 2 CALMs and spinal neurofibromas; no evidence for pathogenicity provided (Kluwe et al.<sup>9</sup>); **c.2617C>T (p.Arg873Cys)**, **c.2663A>G (p.Asp888Gly)** - both variants reported in the same Sicilian individual; the same person also carrying two *NF1* frameshift alterations: c.2480delA, c.2632delC and other missense and synonymous variants (Bongiorno et al.<sup>10</sup>); **c.2764G>A (p.Gly922Ser)** - RNA-based approach analysis demonstrated that variant p.Gly922Ser results in cryptic 5' splice site/ 2761del90 (Ars et al.<sup>11</sup>); **c.2786T>C (p.Leu929Pro)** - reported once, absent in >1000 normal chromosomes, no further evidence for pathogenicity provided (Ribeiro et al.<sup>12</sup>).

Each number in the circle corresponds with the total number of probands with a specific variant. The dotted black line indicates the region studied in this report (codons 844-848). For graph presenting the variants deposited in the HGMD database, right panel shows the variants' classifications originally reported by the author(s), while left panel indicates the classifications based on our re-verification and following the ACMG recommendations.<sup>3</sup> Different colors correspond with the pathogenicity score according to the legend presented below ("exonic splice variants" are not *true* missense mutations; these variants cause missplicing as observed by RNA-based analysis in blood). The phenotypes of individuals from UAB cohort carrying a particular alteration are presented below in the table. The figure was prepared using the ProteinPaint application.<sup>13</sup>

-  Pathogenic
-  Likely pathogenic
-  Variant of uncertain significance
-  Likely benign
-  Benign
  
-  Clinical significance not reported
-  Lack of evidence for pathogenicity
-  Exonic splice variants



| Variant                                     | Phenotype                                                                                                                                                                                                                                                                                              | Classification           |
|---------------------------------------------|--------------------------------------------------------------------------------------------------------------------------------------------------------------------------------------------------------------------------------------------------------------------------------------------------------|--------------------------|
| <b>c.2410G&gt;A</b><br><b>(p.Ala804Thr)</b> | 30-yo Japanese individual with >5 CALMs, freckling, 6-99 cutaneous and 6-99 intradermal nf                                                                                                                                                                                                             | <b>VUS</b>               |
| <b>c.2441A&gt;G</b><br><b>(p.Lys814Arg)</b> | 6-yo Asian individual with >5 CALMs and freckling, also carrying <i>NF1</i> c.1338delA (p.Leu447Phefs*26); p.Lys814Arg ALSO present in the unaffected mother                                                                                                                                           | <b>Likely benign</b>     |
| <b>c.2486C&gt;T</b><br><b>(p.Ser829Phe)</b> | 16-yo Native American proband with right axillary freckling, abdominal internal nf, also carrying <i>NF1</i> c.2894T>G (p.Ile965Arg); p.Ser829Phe ALSO present in the unaffected mother, whereas p.Ile965Arg was <i>de novo</i>                                                                        | <b>Likely benign</b>     |
| <b>c.2509T&gt;C</b><br><b>(p.Trp837Arg)</b> | 24-yo individual with >5 CALMs and freckling                                                                                                                                                                                                                                                           | <b>VUS</b>               |
| <b>c.2509T&gt;G</b><br><b>(p.Trp837Gly)</b> | >5 CALMs and freckling (all individuals, from 3-yo to 20-yo); other complications: abnormal development and asymptomatic OPG (3-yo) and plexiform nf (20-yo)                                                                                                                                           | <b>Pathogenic</b>        |
| <b>c.2521A&gt;C</b><br><b>(p.Thr841Pro)</b> | >5 CALMs and freckling (3-yo); <i>de novo</i> but no identity test done                                                                                                                                                                                                                                | <b>VUS</b>               |
| <b>c.2570A&gt;G</b><br><b>(p.Asn857Ser)</b> | 2.5-yo individual with >5 CALMs; p.Asn857Ser ALSO present in the unaffected mother                                                                                                                                                                                                                     | <b>Likely benign</b>     |
| <b>c.2573C&gt;G</b><br><b>(p.Ser858Cys)</b> | >5 CALMs and freckling, 2-6 cutaneous and 2-6 intradermal nf, long bone dysplasia (31-yo); presence of second nonsense variant c.4108C>T (p.Gln1370*)                                                                                                                                                  | <b>Likely benign</b>     |
| <b>c.2585C&gt;G</b><br><b>(p.Thr862Ser)</b> | 5-yo proband with 1-5 CALMs and pre B-cell acute lymphoblastic leukemia; p.Thr862Ser ALSO present in affected 33-yo mother with 4-5 CALMs, bilateral Lisch nodules and plexiform nf on the leg                                                                                                         | <b>Pathogenic</b>        |
| <b>c.2643G&gt;A</b><br><b>(p.Met881Ile)</b> | 2-yo proband with 1-5 CALMs and freckling; variant ALSO found in 32-yo father with 3 CALMs                                                                                                                                                                                                             | <b>VUS</b>               |
| <b>c.2681T&gt;C</b><br><b>(p.Phe894Ser)</b> | 10-yo proband with >5 CALMs and freckling; variant ALSO found in 12-yo sibling with >5 CALMs and freckling                                                                                                                                                                                             | <b>VUS</b>               |
| <b>c.2693T&gt;C</b><br><b>(p.Leu898Pro)</b> | >5 CALMs and freckling (all individuals, from 1-yo to 38-yo); 2 individuals >26-yo have numerous cutaneous and subcutaneous nf and plexiform nf; proven <i>de novo</i> but no identity test done; p.Leu898Pro ALSO found in father and son of the one individual (son with OPG)                        | <b>Pathogenic</b>        |
| <b>c.2728G&gt;C</b><br><b>(p.Gly910Arg)</b> | only 3-4 CALMs and abnormal development; the presence of second missense variant c.3632T>G (p.Leu1211Arg); familial history, but ONLY variant p.Leu1211Arg was identified in the individual's father and paternal grandfather with the NF1 features; p.Gly910Arg ALSO present in the unaffected mother | <b>Likely benign</b>     |
| <b>c.2740C&gt;T</b><br><b>(p.Arg914Trp)</b> | both individuals with >5 CALMs; individual with abnormal development and pulmonic stenosis has the presence of the second variant ( <i>NF1</i> deletion exons 2-3)                                                                                                                                     | <b>Likely benign</b>     |
| <b>c.2747A&gt;G</b><br><b>(p.Asn916Ser)</b> | 10-mo individual with 1-5 CALMs, brainstem glioma and pectus excavatum (sporadic); 12-yo individual only with >5 CALMs and variant ALSO present in the individual's father with <6 CALMs and in 5-yo brother with >5 CALMs and freckling                                                               | <b>Likely pathogenic</b> |
| <b>c.2750T&gt;A</b><br><b>(p.Val917Asp)</b> | only >5 CALMs; the individual's mother has the NF1 features, but she had not been tested                                                                                                                                                                                                               | <b>VUS</b>               |
| <b>c.2786T&gt;C</b><br><b>(p.Leu929Pro)</b> | 7-mo individual with >6 CALMs and freckles, proven <i>de novo</i> ; for other individuals no data provided                                                                                                                                                                                             | <b>VUS</b>               |
| <b>c.2794A&gt;G</b><br><b>(p.Met932Val)</b> | 4-mo Asian individual with only >5 CALMs                                                                                                                                                                                                                                                               | <b>VUS</b>               |
| <b>c.2798T&gt;C</b><br><b>(p.Leu933Pro)</b> | >5 CALMs and freckles; Lisch nodules (in 2/6 individuals), cutaneous (2/6) and intradermal (2/6) nf, plexiform (1/6) and spinal (1/6) nf, abnormal development (3/6); others: juvenile pilocytic astrocytoma, brainstem hamartoma and pseudarthrosis                                                   | <b>Pathogenic</b>        |

yo - years old; mo - months old; nf - neurofibromas; OPG - optic pathway glioma; VUS - variant of uncertain significance

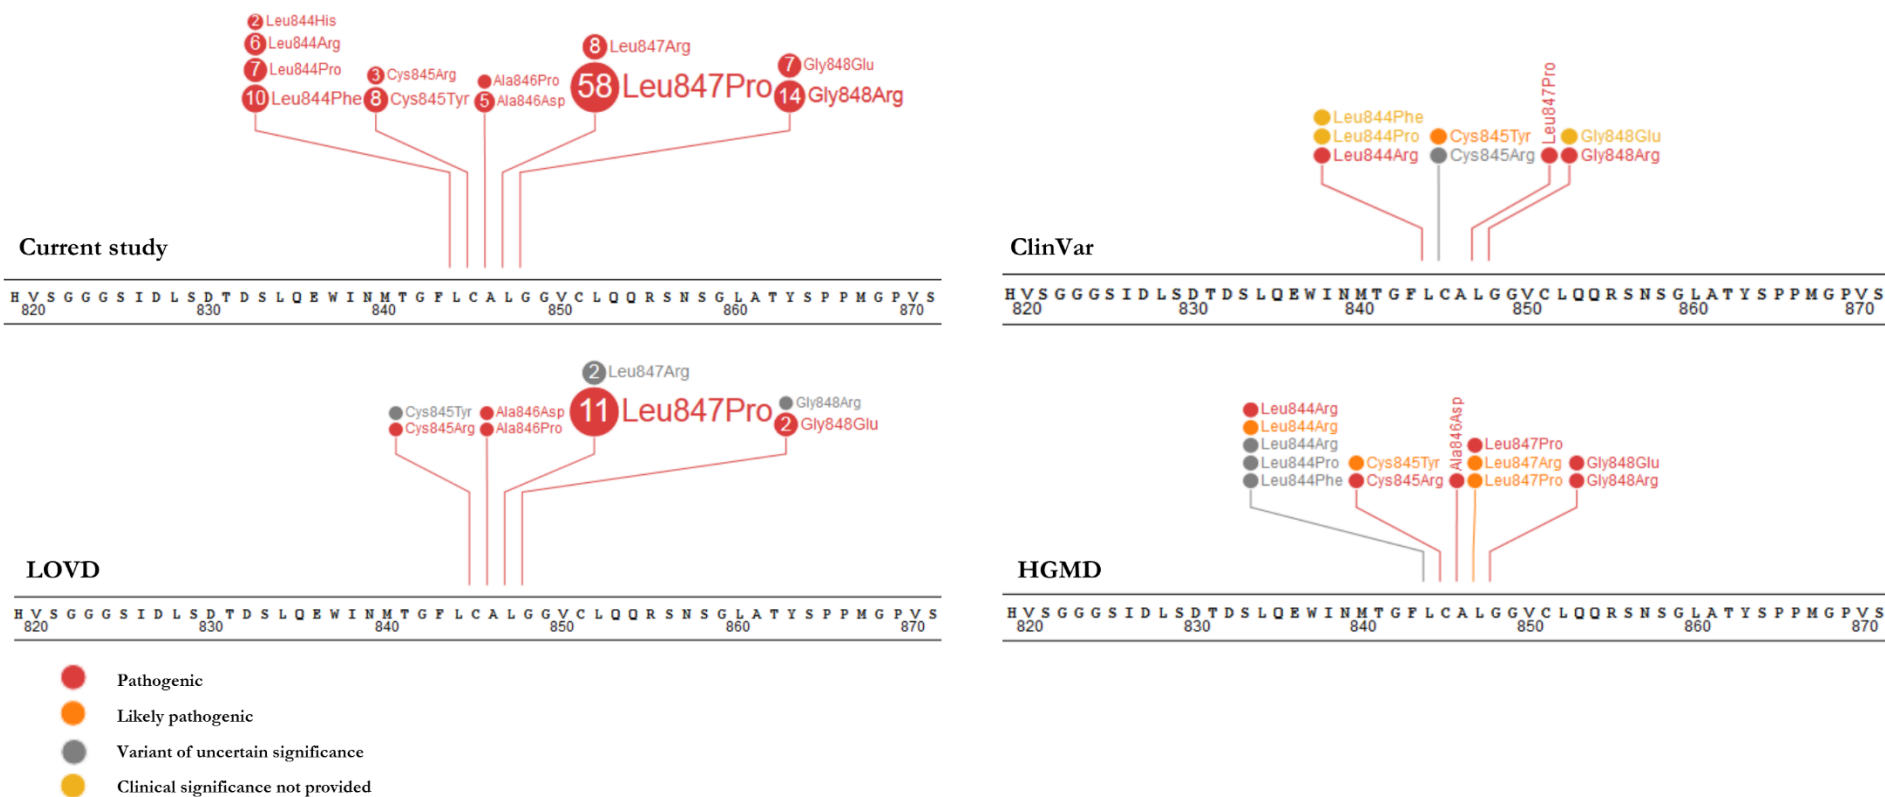

**Figure S3.** The classification of *NFI* missense mutations affecting codons 844-848: a comparison of the classification in the publicly available disease databases (LOVD, ClinVar and HGMD, as of 05/09/2017) with the current study, classifying variants according to the ACMG recommendations (details in Tables S2-S4).

The classifications of the variants deposited in the publicly available LOVD and ClinVar databases are shown here as reported by the original author(s). For variants deposited in the HGMD database, the originally reported variants' classifications were reviewed and if necessary re-classified according to the ACMG guidelines<sup>3</sup> based on the evidence for pathogenicity provided in the published papers by the authors (details in Table S3). Each number in the circle corresponds with the total number of probands with a specific variant. Different colors correspond with the pathogenicity score. The figure was prepared using the ProteinPaint application.<sup>13</sup>

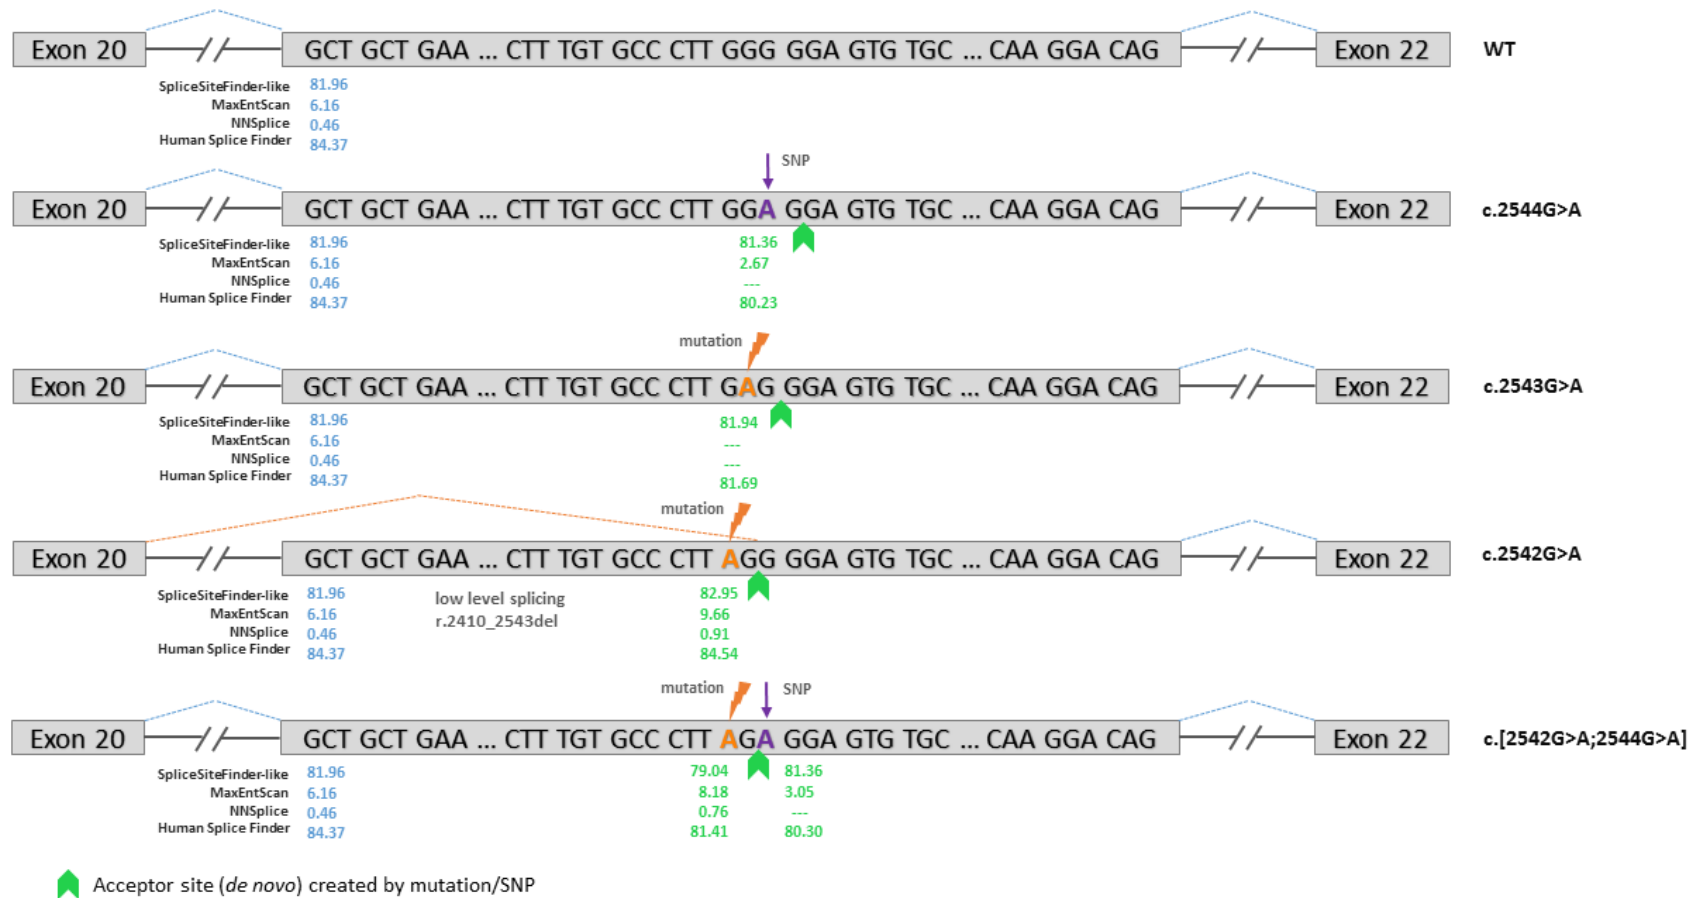

**Figure S4.** *In silico* prediction and *in vivo* analysis of the effect of the *NF1* c.2542G>A (p.Gly848Arg) and c.2543G>A (p.Gly848Glu) missense mutations as well as the single nucleotide polymorphism c.2544G>A (p.Gly848=) on splicing in short-term cultured blood lymphocytes.

Based on the results of *in silico* analysis (SpliceSiteFinder-like, MaxEntScan, NNSplice and Human Splice Finder embedded in Alamut visual software v.2.9.0), a novel splice acceptor site is created by the presence of *NF1* mutations (c.2542G>A and c.2543G>A) as well as by the single nucleotide polymorphism (SNP) at c.2544G>A (rs17883704). *In vivo* transcript analysis and sequencing revealed a minor effect on splicing ONLY for c.2542G>A, resulting in low level of r.2410\_2543del transcript. No missplicing effect was observed in individuals carrying the *NF1* mutation c.2542G>A and SNP; both variants proven to reside in cis through next-generation sequencing.

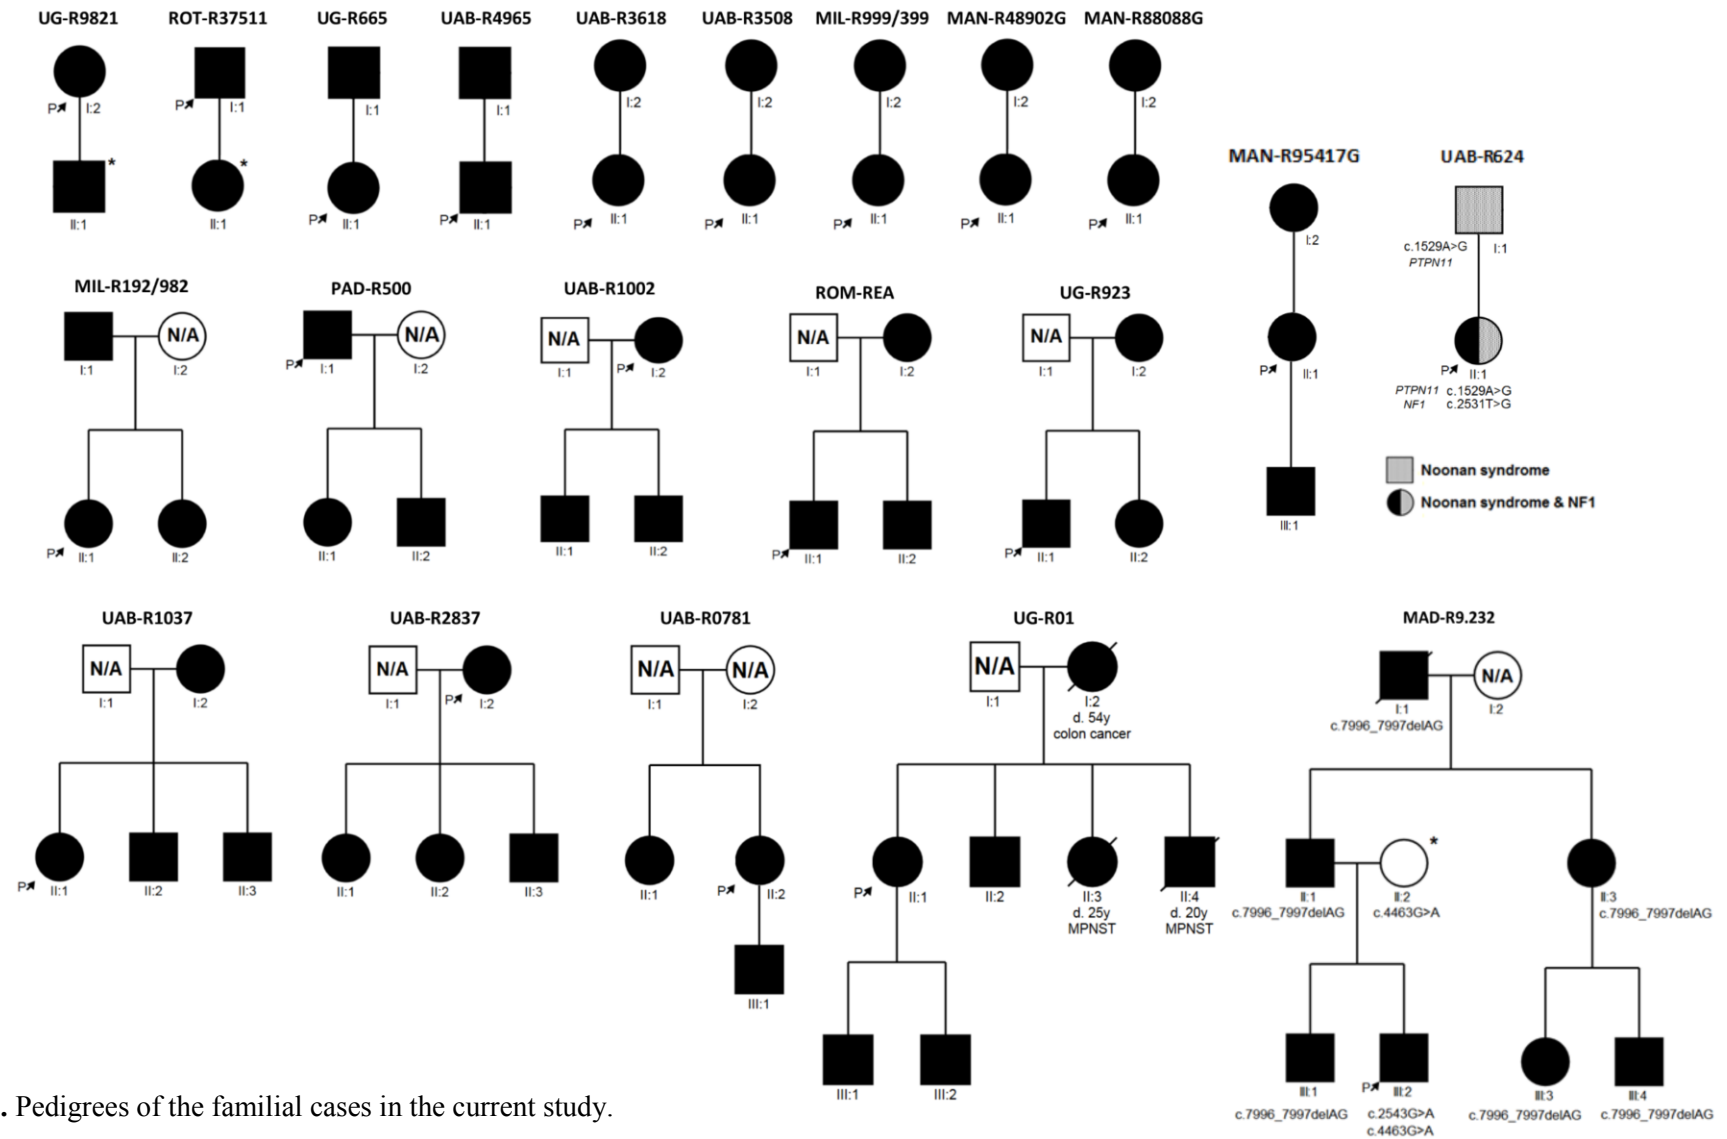

**Figure S5.** Pedigrees of the familial cases in the current study.

The filled black symbols represent the individuals who are positive for an *NF1* missense mutation affecting codons 844-848, while the open symbols represent relatives who are negative for the family specific mutations. The arrow indicates the proband of the family. For the first generation, father is always I:1 and mother is I:2.

**Abbreviations:** N/A - the relatives not available for genetic analysis; \* - no clinical information available for these individuals.

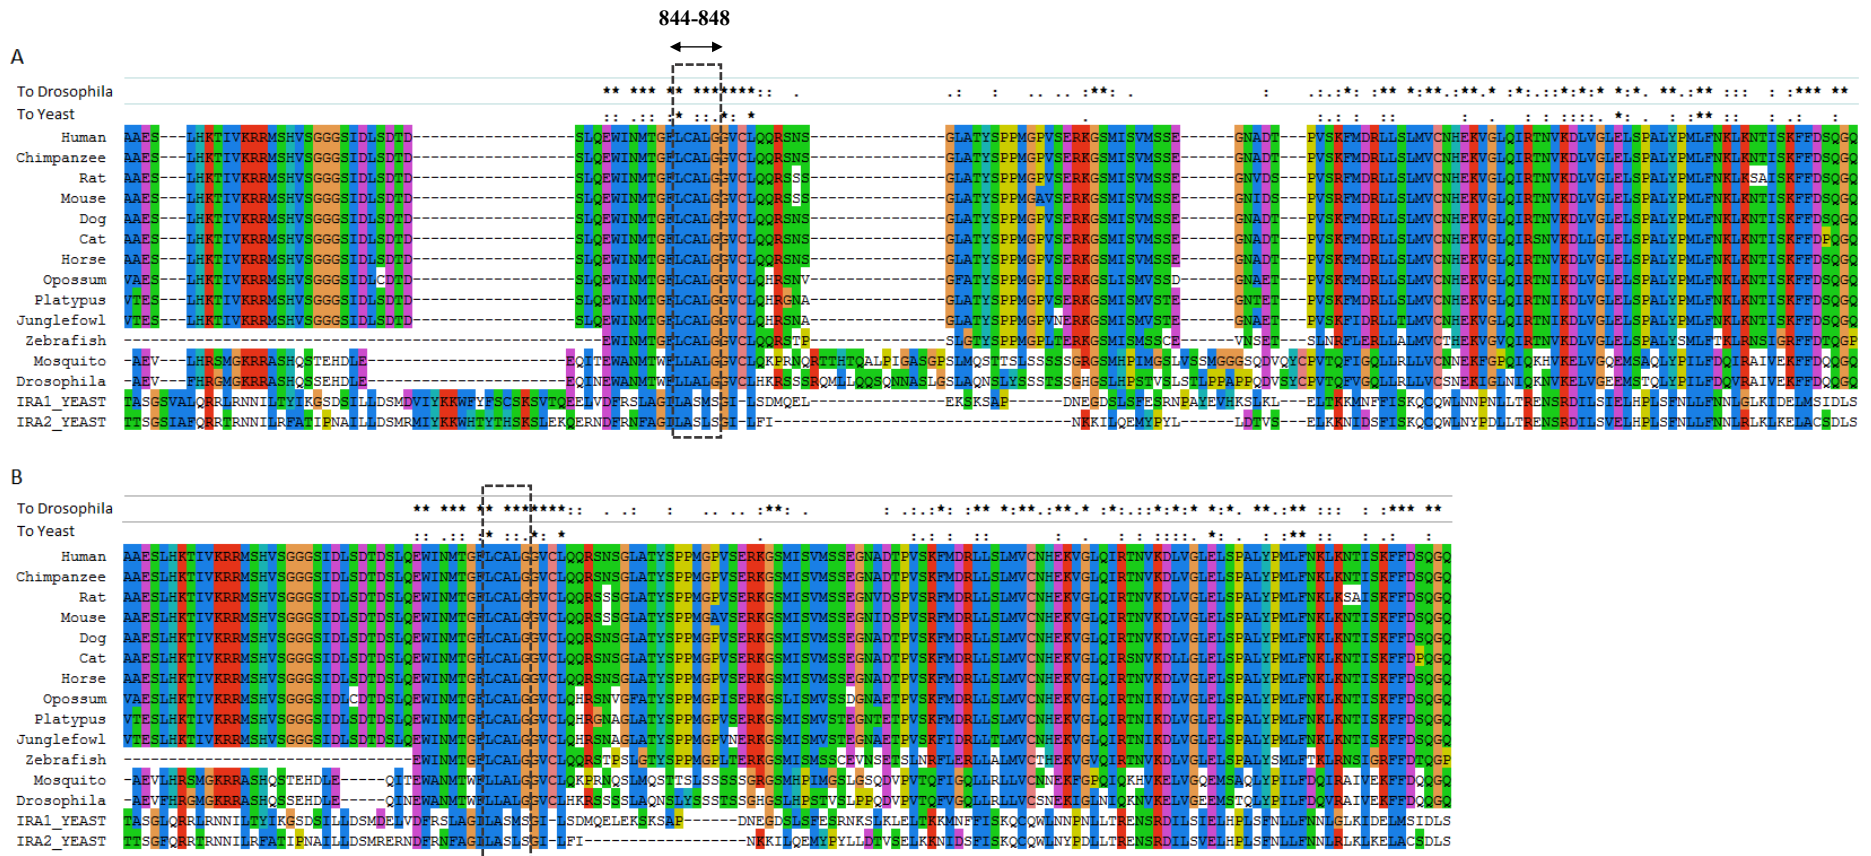

**Figure S6.** Multiple sequence alignment of the exon 21 [16] of *NFI* (A) and multiple sequence alignment of the same region adjusted to the human *NFI* without gaps (B).

Human (RefSeq: NP\_000258.1 residues 804-950), Chimpanzee (TrEMBL: K7DMZ3 residues 804-950), Rat (SWISSPROT: P97526 residues 806-952), Mouse (SWISSPROT: Q04690-2 residues 806-952), Dog (RefSeq: XP\_013971967.1 residues 799-945), Cat (RefSeq: XP\_011287367.1 residues 807-953), Horse (TrEMBL: F6XRM7 residues 739-885), Opossum (TrEMBL: F6ZHU9 residues 564-710), Platypus (RefSeq: XP\_007664859.1 residues 840-986), Junglefowl (RefSeq: XP\_003642464.1 residues 799-945), Zebrafish (TrEMBL: E7FBD0 residues 751-865), Mosquito (TrEMBL: B0WYP5 residues 771-936), Drosophila (TrEMBL: O01397 residues 804-969), yeast IRA1 (SWISSPROT: IRA1\_YEAST residues 1253-1419) and IRA2 (SWISSPROT: IRA2\_YEAST residues 1263-1411) were included in the alignment. The multiple sequence alignment was performed using *Clustal 2.0.12* software with manually adjustment. The black dotted lines on the panels present the region 844-848. An asterisk (\*), a colon (:), and a period (.) indicate the following positions: (\*) a single fully conserved residue, (:) conservation between groups of strongly similar properties and (.) conservation between groups of weakly similar properties.



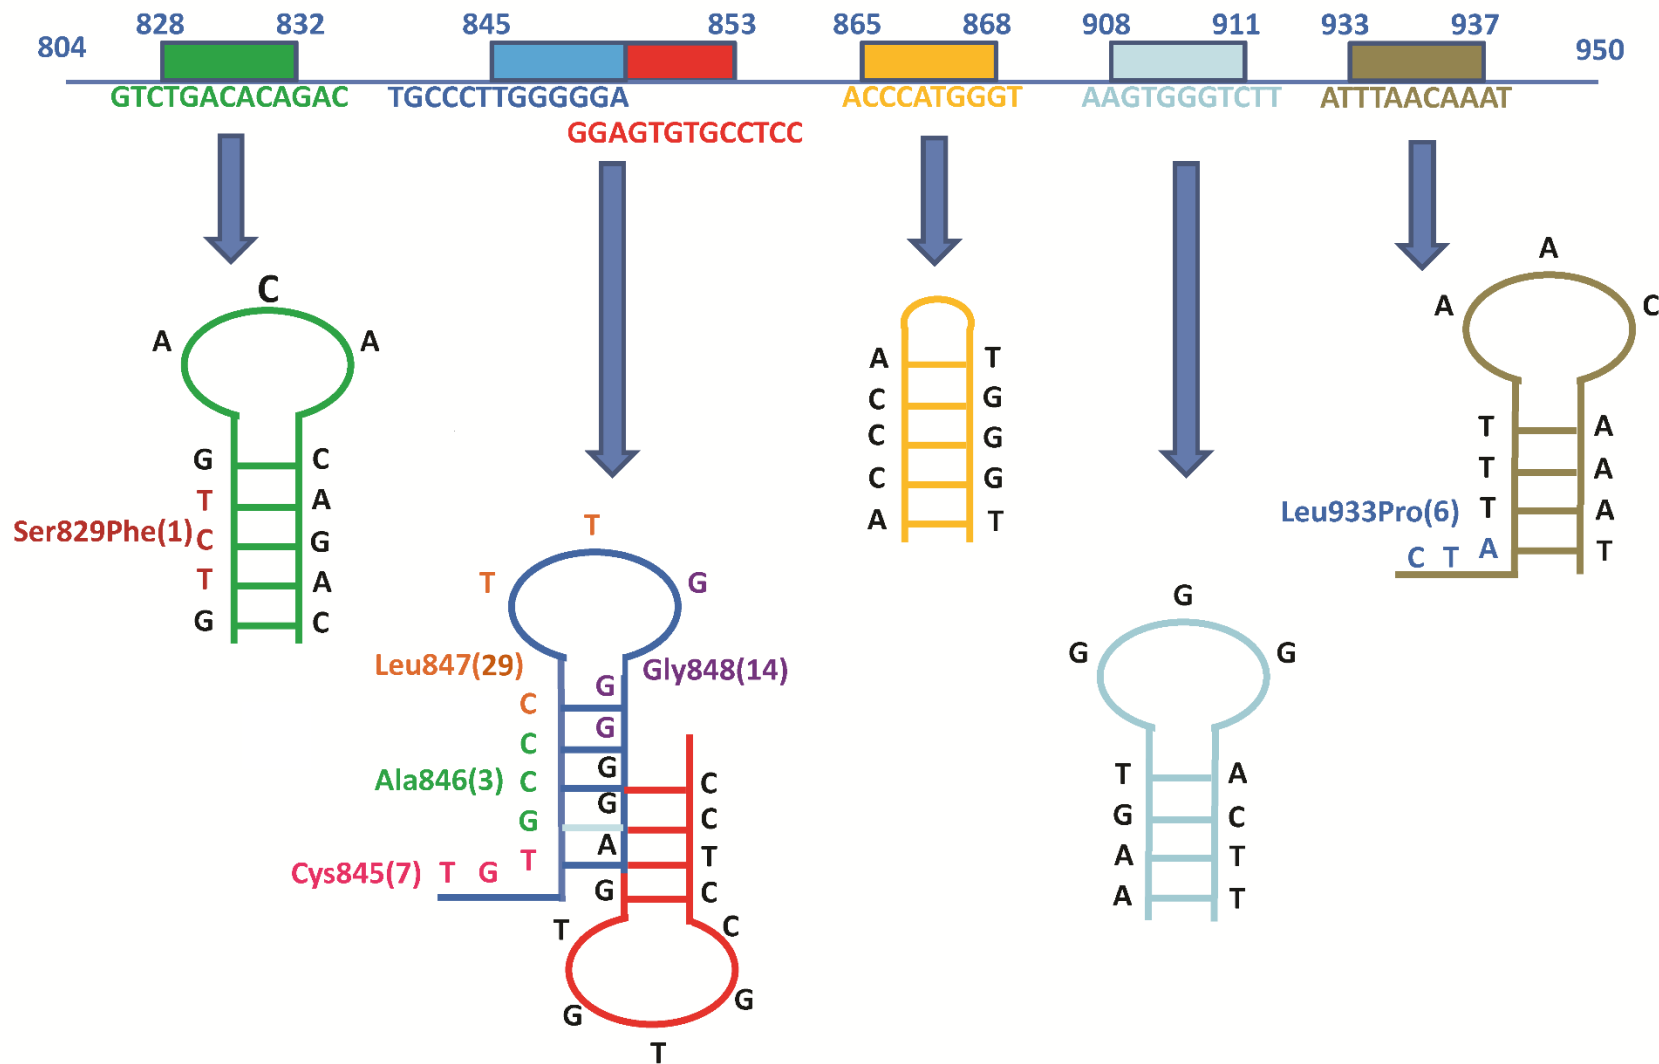

**Figure S7.** Schematic of five palindromic structures in the *NF1* codons 804-950.

Missense mutations with a total number of samples identified in the UAB cohort were annotated next to the palindromic structures with each color corresponding to the variant motif. Particularly, two palindromic sequences TGCCCTTGGGGGA (AA845-849) and GGAGTGTGCCTCC (AA849-853) may form a unique non-B DNA structure contributing recurrent missense mutations.

**Table S1.** Clinical details for 162 individuals with an *NF1* missense mutation affecting one of five codons 844-848 from 129 different families.

Table S1 is included as a separate Excel file.

<sup>A</sup> For individuals with one asterisk (\*) the standardized phenotypic checklist forms were not updated by the referring physicians, the data are based on the originally submitted forms; individuals with two asterisks (\*\*) had incomplete phenotypic checklist forms; individuals with three asterisks (\*\*\*) were the newborn infants without the NF1 features at birth or without the clinical data provided.

<sup>B</sup> **UAB:** University of **A**labama at **B**irmingham (67 probands and 11 relatives); **BRA:** Fluminense Federal University, Niterói, **B**razil (one proband); **CAR:** i/ Division of Cancer and Genetics, Cardiff University, **C**ardiff, UK; ii/ Birmingham Women's and Children's NHS Foundation Trust, Birmingham, UK; iii/ Wessex Regional Genetics Laboratory, Salisbury NHS Foundation Trust, Salisbury, UK; iv/ St George's University Hospitals NHS Foundation Trust, London, UK; v/ Division of Medical Oncology, National Cancer Centre, Singapore (5 probands); **MAD:** Hospital Universitario Ramón y Cajal, Institute of Health Research (IRYCIS) and Center for Biomedical Research-Network for Rare Diseases (CIBERER), **M**adrid, Spain (6 probands); **MAN:** University of **M**anchester, UK (4 probands and 4 relatives); **MIL:** Carlo Besta Neurological Institute, **M**ilan, Italy (6 probands and 3 relatives); **PAD:** University of **P**adova, Italy (5 probands and 2 relatives); **SGR:** Molecular Genetics Unit, Casa Sollievo della Sofferenza Hospital, IRCCS, **S**an **G**iovanni **R**otondo, Italy (4 probands and 2 relatives); **ROT:** Erasmus Medical Center, **R**otterdam, the Netherlands (13 probands); **SHE:** Sheffield Children's NHS Foundation Trust, **S**heffield, UK (one proband); **UL:** University of **L**euven, Leuven, Belgium (one proband); **UF:** University of **F**lorida College of Medicine, Gainesville, Florida, USA (one proband); **UG:** University Hospital, **G**hent, Belgium (15 probands and 11 relatives).

<sup>C</sup> **F:** familial; **PrS:** proven sporadic; **RS:** reportedly sporadic; **NS:** not specified

<sup>D</sup> Exact age was used to calculate Height and Head Circumferences, but provided as age-groups in Table S1: 0-24 months; 2-4 years; 5-8 years; 9-13 years; 14-18 years; 19-26 years; >26 years.

<sup>E</sup> **F:** female; **M:** male

<sup>F</sup> **W:** White; **His:** Hispanic; **AA:** African American; **As:** Asian; **NaA:** Native American; **Pa:** Pakistani; **Fil:** Filipino; **A:** African; **Jew:** Jewish

<sup>G</sup> An individual was classified as having „NF-Noonan” if at least two of the following features were present: short stature (SS), low set ears (LSE), hypertelorism (HTL), midface hypoplasia (MH), webbed neck (WN) or pulmonic stenosis (PS).

<sup>H</sup> Height percentiles for Hispanic and Asian individuals were provided in square brackets to indicate that they were excluded from the data analysis on frequency of short or normal stature due to the lack of ethnic-specific growth charts.

<sup>I</sup> Individuals with ADD/ADHD, but normal development were still classified as normal.

#### **Abbreviations:**

**NS:** not specified; **bil:** bilateral; **gr:** groin; **ax:** axillary; **OPG:** optic pathway glioma; **N, UN:** no symptomatic OPG or symptomatic spinal neurofibroma, unknown if any asymptomatic OPG or asymptomatic spinal neurofibromas are present; **N, MRI:** no symptomatic and asymptomatic OPG or spinal neurofibroma detected by **MRI**; **Y, MRI:** yes, presence of OPG or spinal neurofibroma confirmed by **MRI**; **ASD:** atrial septal defect; **LD:** learning disability; **HTL:** hypertelorism; **MH:** midface hypoplasia; **SS:** short stature; **PT:** ptosis; **PS:** pulmonic stenosis; **DPF:** downslanting palpebral fissures; **LSE:** low set ears; **ADD:** attention deficit disorder; **ADHD:** attention deficit hyperactivity disorder; **SD:** speech delay; **F:** father; **M:** mother; **S:** sibling; **C:** child.

**Table S2.** *In silico* prediction of pathogenicity and *in vivo* splicing analysis of *NF1* missense mutations affecting codons 844-848 in the studied group.

| Variant   | Protein     | 844-848 positive probands | 844-848 positive UAB probands | gnomAD (123,136) | EVS (6,503) | 1000 G | HGMD <sup>A</sup> | LOVD <sup>A</sup> (3,384) | ClinVar <sup>A</sup> | Grantham distance | SIFT                | PolyPhen                  | CADD | SSF/ MaxEntScan/ NNSplice/HSF                                                                                                                                    | RNA observed                | Other evidence <sup>B</sup>                                                                                                                                                             |
|-----------|-------------|---------------------------|-------------------------------|------------------|-------------|--------|-------------------|---------------------------|----------------------|-------------------|---------------------|---------------------------|------|------------------------------------------------------------------------------------------------------------------------------------------------------------------|-----------------------------|-----------------------------------------------------------------------------------------------------------------------------------------------------------------------------------------|
| c.2530C>T | p.Leu844Phe | 10/129                    | 5/67                          | 0                | 0           | 0      | Present (DM)      | 0                         | Present (NP)         | 22                | Deleterious (0)     | Probably damaging (0.997) | 27.2 | No change                                                                                                                                                        | Normal                      | Proven <i>de novo</i> (UAB-R2425; UAB-R8475; UAB-R0903); segregation in family (MAN-R48902G)                                                                                            |
| c.2531T>A | p.Leu844His | 2/129                     | 1/67                          | 0                | 0           | 0      | 0                 | 0                         | 0                    | 99                | Deleterious (0)     | Probably damaging (0.999) | 26.6 | No change                                                                                                                                                        | Normal                      | Proven <i>de novo</i> (UAB-R4444)                                                                                                                                                       |
| c.2531T>C | p.Leu844Pro | 7/129                     | 5/67                          | 0                | 0           | 0      | Present (DM)      | 0                         | Present (NP)         | 98                | Deleterious (0)     | Probably damaging (0.997) | 25.9 | No change                                                                                                                                                        | Normal                      | Proven <i>de novo</i> (UAB-R3714; UAB-R2087; UAB-R8047; UAB-R0075)                                                                                                                      |
| c.2531T>G | p.Leu844Arg | 6/129                     | 3/67                          | 0.00041%         | 0           | 0      | Present (DM)      | 0                         | Present (P)          | 102               | Deleterious (0)     | Probably damaging (0.997) | 26.8 | No change                                                                                                                                                        | Normal                      | Proven <i>de novo</i> (UAB-R624)                                                                                                                                                        |
| c.2533T>C | p.Cys845Arg | 3/129                     | 1/67                          | 0                | 0           | 0      | Present (DM)      | 1 (P)                     | Present (VUS)        | 180               | Deleterious (0.010) | Possibly damaging (0.571) | 22.6 | No change                                                                                                                                                        | Normal                      | Proven <i>de novo</i> (UAB-R3112); segregation in family (MAN-R88088G)                                                                                                                  |
| c.2534G>A | p.Cys845Tyr | 8/129                     | 6/67                          | 0                | 0           | 0      | Present (DM?)     | 1 (VUS)                   | Present (LP)         | 194               | Deleterious (0.01)  | Possibly damaging (0.891) | 23.2 | No change                                                                                                                                                        | Normal                      | Proven <i>de novo</i> (UAB-R9135; UAB-R7836; UAB-R2696)                                                                                                                                 |
| c.2536G>C | p.Ala846Pro | 1/129                     | 0/67                          | 0                | 0           | 0      | 0                 | 1 (P)                     | 0                    | 27                | Deleterious (0.03)  | Probably damaging (0.999) | 27   | No change                                                                                                                                                        | Normal                      | Segregation in family (UG-R0781)                                                                                                                                                        |
| c.2537C>A | p.Ala846Asp | 5/129                     | 3/67                          | 0                | 0           | 0      | Present (DM)      | 1 (P)                     | 0                    | 126               | Deleterious (0.01)  | Probably damaging (0.999) | 31   | No change                                                                                                                                                        | Normal                      | Proven <i>de novo</i> ( <b>ROT-R02233</b> ); segregation in family (UAB-R3618; UG-R665)                                                                                                 |
| c.2540T>C | p.Leu847Pro | 58/129                    | 27/67                         | 0                | 0           | 0      | Present (DM)      | 11 (P)                    | Present (P)          | 98                | Deleterious (0.01)  | Probably damaging (0.997) | 26.1 | No change                                                                                                                                                        | Normal                      | Proven <i>de novo</i> (UAB-R9676; UAB-R2266; <b>ROT-R22853</b> ; <b>ROT-R17435</b> ; UG-R5831); segregation in multiple families (UAB-R4965; UAB-R3508; UG-R01; PAD-R500; MIL-R192/982) |
| c.2540T>G | p.Leu847Arg | 8/129                     | 2/67                          | 0                | 0           | 0      | Present (DM?)     | 2 (VUS)                   | 0                    | 102               | Deleterious (0)     | Probably damaging (0.997) | 27   | No change                                                                                                                                                        | Normal                      | Proven <i>de novo</i> (UAB-R6913; UG-R399)                                                                                                                                              |
| c.2542G>C | p.Gly848Arg | 8/129                     | 5/67                          | 0                | 0           | 0      | Present (DM)      | 1 (VUS)                   | Present (P)          | 125               | Deleterious (0.02)  | Probably damaging (1)     | 27.2 | No change                                                                                                                                                        | Normal                      | Proven <i>de novo</i> (UAB-R45401FN.201); segregation in multiple families (UAB-R1002; UAB-R1037; UAB-R2837; UG-R923; MIL-R999/399)                                                     |
| c.2542G>A | p.Gly848Arg | 6/129                     | 5/67                          | 0                | 0           | 0      | 0                 | 0                         | 0                    | 125               | Deleterious (0.02)  | Probably damaging (1)     | 28.2 | Creates a novel splice acceptor sequence in the exon that is used in a small fraction of transcripts: from WT cc/cc/cc to MUT - 83.0 / 9.7 / 0.9 / 84.5 (Fig S4) | Low level of r.2410_2543del | Proven <i>de novo</i> (UAB-R4476; UAB-R3513)                                                                                                                                            |
| c.2543G>A | p.Gly848Glu | 7/129                     | 4/67                          | 0                | 0           | 0      | Present (DM)      | 2 (P)                     | Present (NP)         | 98                | Deleterious (0.03)  | Probably damaging (1)     | 27.2 | Creates a novel splice acceptor sequence in the exon: from WT cc/cc/cc/ to MUT - 81.9 / - / - / 81.7 (Fig S4)                                                    | No missplicing observed     | Proven <i>de novo</i> (UAB-R1333; MAD-R9.232); segregation in family (SGR-REA; MAN-R95417G)                                                                                             |

**Abbreviations** - **gnomAD**: the **G**enome **A**ggregation **D**atabase; **EVS**: **E**xome **V**ariant **S**erver; **1000 G**: **1000 G**enomes Project; **HGMD**: **H**uman **G**ene **M**utation **D**atabase; **LOVD**: **L**eiden **O**pen **V**ariation **D**atabase; **CADD**: **C**ombined **A**nnotation **D**ependent **D**epletion; **SSF**: **S**plice**S**ite**F**inder-like; **HSF**: **H**uman **S**plicing **F**inder; **VUS**: **v**ariant of **u**ncertain **s**ignificance; **P**: **p**athogenic; **LP**: **l**ikely **p**athogenic; **DM**: **d**isease causing; **DM?**: likely disease causing; **NP**: clinical significance **n**ot **p**rovided.

<sup>A</sup> The variants' classifications presented in round brackets have been exactly the same as reported by the original author(s). <sup>B</sup> Individuals proven *de novo* with the confirmed biological relationships are shown in bold.

**Table S3.** The classification of *NF1* missense mutations affecting codons 844-848 reported in the studied group: a comparison of the publicly available disease databases (LOVD, ClinVar and HGMD, as of 05/09/2017) with the current study.

| Variant   | Protein     | LOVD <sup>A</sup>                                                                   | ClinVar <sup>A</sup>                                                                | HGMD <sup>B</sup>                                                                                                                                                                                                                                                     | This study <sup>C</sup>                                                               |
|-----------|-------------|-------------------------------------------------------------------------------------|-------------------------------------------------------------------------------------|-----------------------------------------------------------------------------------------------------------------------------------------------------------------------------------------------------------------------------------------------------------------------|---------------------------------------------------------------------------------------|
| c.2530C>T | p.Leu844Phe |                                                                                     |    |  <sup>a,b</sup>                                                                                                                                                                      |    |
| c.2531T>A | p.Leu844His |                                                                                     |                                                                                     |                                                                                                                                                                                                                                                                       |    |
| c.2531T>C | p.Leu844Pro |                                                                                     |    |  <sup>b</sup>                                                                                                                                                                        |    |
| c.2531T>G | p.Leu844Arg |                                                                                     |    |    <sup>c-e</sup> |    |
| c.2533T>C | p.Cys845Arg |    |    |  <sup>f</sup>                                                                                                                                                                        |    |
| c.2534G>A | p.Cys845Tyr |    |    |  <sup>f</sup>                                                                                                                                                                        |    |
| c.2536G>C | p.Ala846Pro |    |                                                                                     |                                                                                                                                                                                                                                                                       |    |
| c.2537C>A | p.Ala846Asp |    |                                                                                     |  <sup>f</sup>                                                                                                                                                                        |    |
| c.2540T>C | p.Leu847Pro |    |    |    <sup>g,h</sup> |    |
| c.2540T>G | p.Leu847Arg |    |                                                                                     |  <sup>f</sup>                                                                                                                                                                        |    |
| c.2542G>A | p.Gly848Arg |                                                                                     |                                                                                     |                                                                                                                                                                                                                                                                       |    |
| c.2542G>C | p.Gly848Arg |  |  |  <sup>i</sup>                                                                                                                                                                      |  |
| c.2543G>A | p.Gly848Glu |  |  |  <sup>h</sup>                                                                                                                                                                      |  |

**Benign** 

**Likely benign** 

**Variant of uncertain significance** 

**Likely pathogenic** 

**Pathogenic** 

**Clinical significance not provided** 

<sup>A</sup> The variants' classification is provided as reported by the original author(s); <sup>B</sup> the originally reported variants' classifications have been reviewed and if necessary re-classified based on evidence for pathogenicity provided by the authors in the published papers and according to the ACMG recommendations; <sup>C</sup> the variants' classification according to the ACMG recommendations (details in Table S4).

**HGMD:** <sup>a</sup> reported in 1/93 unrelated NF1 individuals fulfilling the NIH diagnostic criteria; no phenotypic details available; no evidence for pathogenicity provided (Girodon-Boulant et al.<sup>19</sup>); <sup>b</sup> reported in 2/91 unrelated NF1 individuals fulfilling the NIH diagnostic criteria; no phenotypic details available; no evidence for pathogenicity provided (Mattocks et al.<sup>4</sup>); <sup>c</sup> reported once in sporadic case of 465 unrelated NF1 individuals; no phenotypic details available; no evidence for pathogenicity provided (Maynard et al.<sup>8</sup>); <sup>d</sup> proven *de novo*, no other evidence for pathogenicity provided (Wang et al.<sup>20</sup>); <sup>e</sup> proven *de novo*, absence in normal controls, phenotype highly specific for a disease (Bertola et al.<sup>14</sup>); <sup>f</sup> absence in normal controls, segregation studies, proven *de novo* with paternity confirmation, *in silico* analysis (van Minkelen et al.<sup>5</sup>); <sup>g</sup> reported in 1/521 unrelated NF1 individuals, *in silico* analysis, no other evidence for pathogenicity provided (Fahsold et al.<sup>21</sup>); <sup>h</sup> absence in normal controls, disease phenotype segregated with the mutation in familial cases, *in silico* analysis (De Luca et al.<sup>22</sup>; De Luca et al.<sup>23</sup>); <sup>i</sup> disease phenotype segregated with the mutation in familial cases, phenotype highly specific for a disease (Pascual-Castroviejo et al.<sup>17</sup>)

**Table S4.** The classification of *NF1* missense mutations affecting codons 844-848 reported in the studied group according to the ACMG recommendations.<sup>3</sup>

| Variant   | Protein     | PS1 | PS2 <sup>A</sup> | PS3             | PS4 | PM1 <sup>B</sup> | PM2 | PM3 | PM4 | PM5 <sup>C</sup> | PM6 <sup>D</sup> | PP1 <sup>E</sup> | PP2 | PP3 | PP4 <sup>F</sup> | PP5 <sup>G</sup>   | Variant classification <sup>H</sup> |
|-----------|-------------|-----|------------------|-----------------|-----|------------------|-----|-----|-----|------------------|------------------|------------------|-----|-----|------------------|--------------------|-------------------------------------|
| c.2530C>T | p.Leu844Phe | N/A | N/A              | ?               | YES | ?                | YES | N/A | N/A | YES              | YES              | N/A              | ?   | YES | YES              | NO                 | VUS → Pathogenic                    |
| c.2531T>G | p.Leu844Arg | N/A | N/A              | ?               | YES | ?                | NO  | N/A | N/A | N/A              | YES              | YES              | ?   | YES | YES              | YES <sup>2,3</sup> | Pathogenic → Pathogenic             |
| c.2531T>C | p.Leu844Pro | N/A | N/A              | ?               | YES | ?                | YES | N/A | N/A | YES              | YES              | N/A              | ?   | YES | YES              | NO                 | VUS → Pathogenic                    |
| c.2531T>A | p.Leu844His | N/A | N/A              | ?               | YES | ?                | YES | N/A | N/A | YES              | YES              | N/A              | ?   | YES | YES              | N/A                | ? → Pathogenic                      |
| c.2533T>C | p.Cys845Arg | N/A | N/A              | ?               | YES | ?                | YES | N/A | N/A | N/A              | YES              | N/A              | ?   | YES | YES              | YES <sup>1,3</sup> | Pathogenic → Pathogenic             |
| c.2534G>A | p.Cys845Tyr | N/A | N/A              | ?               | YES | ?                | YES | N/A | N/A | YES              | YES              | N/A              | ?   | YES | YES              | NO                 | VUS → Pathogenic                    |
| c.2536G>C | p.Ala846Pro | N/A | N/A              | ?               | YES | ?                | YES | N/A | N/A | N/A              | N/A              | YES              | ?   | YES | YES              | YES <sup>1</sup>   | Pathogenic → Pathogenic             |
| c.2537C>A | p.Ala846Asp | N/A | YES              | ?               | YES | ?                | YES | N/A | N/A | N/A              | N/A              | N/A              | ?   | YES | YES              | YES <sup>1,3</sup> | Pathogenic → Pathogenic             |
| c.2540T>C | p.Leu847Pro | N/A | YES              | ?               | YES | ?                | YES | N/A | N/A | N/A              | N/A              | YES              | ?   | YES | YES              | YES <sup>1,3</sup> | Pathogenic → Pathogenic             |
| c.2540T>G | p.Leu847Arg | N/A | N/A              | ?               | YES | ?                | YES | N/A | N/A | YES              | YES              | N/A              | ?   | YES | YES              | NO                 | VUS → Pathogenic                    |
| c.2542G>A | p.Gly848Arg | YES | N/A              | ?               | YES | ?                | YES | N/A | N/A | YES              | YES              | N/A              | ?   | YES | YES              | N/A                | ? → Pathogenic                      |
| c.2542G>C | p.Gly848Arg | N/A | N/A              | NO <sup>1</sup> | YES | ?                | YES | N/A | N/A | N/A              | YES              | YES              | ?   | YES | YES              | YES <sup>2,3</sup> | Pathogenic → Pathogenic             |
| c.2543G>A | p.Gly848Glu | N/A | N/A              | ?               | YES | ?                | YES | N/A | N/A | N/A              | YES              | YES              | ?   | YES | YES              | YES <sup>1,3</sup> | Pathogenic → Pathogenic             |

**PS1:** same amino acid change as a previously established pathogenic variant regardless of nucleotide change; **PS2:** proven *de novo* (both maternity and paternity confirmed); **PS3:** well-established functional studies; **PS4:** the prevalence of the variant in affected individuals is significantly increased compared to the prevalence in controls; **PM1:** located in a mutational hot spot and/or in critical functional domain; **PM2:** absent from controls; **PM3:** for recessive disorders, detected in *trans* with a pathogenic variant; **PM4:** protein length changes due to in-frame or stop-loss variants; **PM5:** novel missense change at amino acid residue where a different pathogenic missense change has been seen before; **PM6:** assumed *de novo*, but without confirmation of paternity and maternity; **PP1:** co-segregation with disease in multiple affected family members; **PP2:** missense variant in a gene that has a low rate of benign missense variation; **PP3:** multiple lines of computational evidence support a deleterious effect on the gene or gene product; **PP4:** individual's phenotype or family history is highly specific for a disease; **PP5:** reputable source reports variant as pathogenic; **N/A:** not applicable; **YES:** the criterion has been fulfilled; **NO:** the criterion has not been fulfilled; **?:** due to the lack of evidence, it is difficult to establish whether the criterion has been fulfilled or not.

<sup>A</sup> based on the data from LOVD database (only individuals confirmed as *de novo* and identified in the Netherlands where biological relationships were confirmed as part of the *de novo* assessment have been taken into account); <sup>B</sup> CSRD domain has not been proved to be critical to protein function (as function is largely unknown still), thus this evidence could not be considered as moderate evidence of pathogenicity; <sup>C</sup> variants classified as *pathogenic* in the publicly available disease databases (LOVD, ClinVar, HGMD) have been taken into account; <sup>D</sup> only individuals confirmed as *de novo* at UAB have been taken into account, except for variants fulfilling the PS2 criterion (p.Ala846Asp and p.Leu847Pro); <sup>E</sup> segregation with at least three affected family members needed to fulfill this criterion; <sup>F</sup> at least one individual with "classic" NF1 phenotype, including neurofibroma(s) and/or Lisch nodules was considered required to fulfill this criterion; <sup>G</sup> based on the variant's classification as pathogenic reported in LOVD (1), ClinVar (2) and/or HGMD (3) databases (details in Table S3); <sup>H</sup> prior variants classification as reported in the publicly available disease databases (LOVD, ClinVar, HGMD) and *a posteriori* classification based on our study and following the ACMG recommendations; <sup>1</sup> based on functional studies by Li et al.<sup>24</sup> and Toonen et al.<sup>25</sup>

**To classify variant as pathogenic the following criteria need to be fulfilled:** ≥2 strong (PS1-PS4) OR 1 strong (PS1-PS4) and ≥3 moderate (PM1-PM6) OR 1 strong (PS1-PS4) and 2 moderate (PM1-PM6) and ≥2 supporting (PP1-PP5) OR 1 strong (PS1-PS4) and 1 moderate (PM1-PM6) and ≥4 supporting (PP1-PP5).

**Table S5.** The age of the individuals who did present with CALMs-only (either >5 or < 6), but carried a missense mutation affecting one of five *NF1* codons 844-848 in this study.

| Family ID        | cDNA level | Protein level | Age group   | Family ID                | cDNA level          | Protein level            | Age group   |
|------------------|------------|---------------|-------------|--------------------------|---------------------|--------------------------|-------------|
| >5 CALMs         |            |               |             | <6 CALMs                 |                     |                          |             |
| UAB-R8475        | c.2530C>T  | p.Leu844Phe   | 14-18 years | UAB-R2696 <sup>A</sup>   | c.2534G>A           | p.Cys845Tyr              | 14-18 years |
| UAB-R8047        | c.2531T>C  | p.Leu844Pro   | 0-24 months | * UAB-R9135 <sup>B</sup> | c.2534G>A           | p.Cys845Tyr              | 19-26 years |
| ROT-R13734       | c.2534G>A  | p.Cys845Tyr   | 0-24 months | * UG-R5831 <sup>C</sup>  | c.2540T>C           | p.Leu847Pro              | 5-8 years † |
| UG-R391          | c.2534G>A  | p.Cys845Tyr   | 2-4 years   | UAB-R9493                | c.2542G>A           | p.Gly848Arg              | 5-8 years   |
| ROT-R36375       | c.2540T>G  | p.Leu847Arg   | 0-24 months | UAB-R1037-S2             | c.2542G>C           | p.Gly848Arg              | 0-24 months |
| UAB-R6913        | c.2540T>G  | p.Leu847Arg   | 5-8 years   | UAB-R2837-C1             | c.2542G>C           | p.Gly848Arg              | 2-4 years   |
| UAB-R09001FN.101 | c.2540T>C  | p.Leu847Pro   | 0-24 months | UAB-R2837-C3             | c.2542G>C           | p.Gly848Arg              | 2-4 years   |
| UAB-R6106        | c.2540T>C  | p.Leu847Pro   | 0-24 months | UAB-R2837-C2             | c.2542G>C           | p.Gly848Arg              | 5-8 years   |
| UAB-R3537        | c.2540T>C  | p.Leu847Pro   | 0-24 months | UAB-R1037-M              | c.2542G>C           | p.Gly848Arg              | >26 years   |
| ROT-R2CMUL       | c.2540T>C  | p.Leu847Pro   | 0-24 months | MAD-R9.232               | c.[2543G>A;4463G>A] | p.[Gly848Glu;Arg1488His] | 5-8 years   |
| CAR-R655763      | c.2540T>C  | p.Leu847Pro   | 0-24 months |                          |                     |                          |             |
| UG-R746          | c.2540T>C  | p.Leu847Pro   | 0-24 months |                          |                     |                          |             |
| UAB-R9676        | c.2540T>C  | p.Leu847Pro   | 2-4 years   |                          |                     |                          |             |
| ROT-R49013       | c.2540T>C  | p.Leu847Pro   | >26 years   |                          |                     |                          |             |
| UAB-R45401FN.201 | c.2542G>C  | p.Gly848Arg   | 9-13 years  |                          |                     |                          |             |
| UAB-R1333        | c.2543G>A  | p.Gly848Glu   | 0-24 months |                          |                     |                          |             |

<sup>A</sup> Individual had also two superficial plexiform neurofibromas on trunk and back and symptomatic spinal neurofibroma; <sup>B</sup> Individual had one superficial plexiform neurofibroma on trunk and no CALMs; <sup>C</sup> Individual had very severe phenotype, presenting shortly after birth; three plexiform neurofibromas, including right orbital tumor, one located in right middle ear and one on neck, visible from outside; protrusion of the right eye with hemangiomas on the right cheek confirmed by MRI; severe epilepsy with attacks occurring mostly in sleep or during feeding, causing vomiting; individual was not able to eat (tube feeding); deceased at age of ~8 years.

\* None CALMs had been observed in these individuals.



**Table S6.** Spinal neurofibromas in individuals carrying a missense mutation affecting one of five codons 844-848 in this study.

| Family ID                                      | cDNA level | Protein level | Family history | Age         | CALMs | Freckles | Neurofibromas                                                                                                                                                                  | Others                                                                                                                                                                                                                                                      | Comments                                                                                                                                                                                                                                                                                                                                                                                                                                                                                                                                  |
|------------------------------------------------|------------|---------------|----------------|-------------|-------|----------|--------------------------------------------------------------------------------------------------------------------------------------------------------------------------------|-------------------------------------------------------------------------------------------------------------------------------------------------------------------------------------------------------------------------------------------------------------|-------------------------------------------------------------------------------------------------------------------------------------------------------------------------------------------------------------------------------------------------------------------------------------------------------------------------------------------------------------------------------------------------------------------------------------------------------------------------------------------------------------------------------------------|
| <b><u>SYMPTOMATIC SPINAL NEUROFIBROMAS</u></b> |            |               |                |             |       |          |                                                                                                                                                                                |                                                                                                                                                                                                                                                             |                                                                                                                                                                                                                                                                                                                                                                                                                                                                                                                                           |
| UAB-R2696                                      | c.2534G>A  | p.Cys845Tyr   | PrS            | 14-18 years | <6    | -        | plexiform neurofibromas on trunk and back (visible from outside)                                                                                                               | mild scoliosis, hypertension, Noonan phenotype features                                                                                                                                                                                                     | MRI: innumerable spinal, intercostal, brachial and lumbosacral plexiform neurofibromas; large right-sided paraspinous neurofibroma in the lumbosacral region (12 cm in length)                                                                                                                                                                                                                                                                                                                                                            |
| UG-R399                                        | c.2540T>G  | p.Leu847Arg   | PrS            | 5-8 years   | >5    | NS       | plexiform neurofibroma on trunk (visible from outside and internal, without hyperpigmentation)                                                                                 | scoliosis, Noonan-phenotype features, abnormal development, gross motor delays, LD, ADHD, SD                                                                                                                                                                | extensive spinal neurofibromas on the costal nerves T8-11 right side; visible externally but much larger on MRI                                                                                                                                                                                                                                                                                                                                                                                                                           |
| UAB-R3508                                      | c.2540T>C  | p.Leu847Pro   | F              | 14-18 years | >5    | +        | plexiform neurofibromas on neck, trunk and left arm (visible from outside, with hyperpigmentation)                                                                             | symptomatic OPG, abnormal development, LD, ADD, ADHD                                                                                                                                                                                                        | none                                                                                                                                                                                                                                                                                                                                                                                                                                                                                                                                      |
| UAB-R01701FN.103                               | c.2540T>C  | p.Leu847Pro   | F              | 19-26 years | >5    | +        | plexiform neurofibromas on neck, left leg, left foot and abdomen (visible from outside); multiple cutaneous and subcutaneous neurofibromas on all parts of the body (#unknown) | Lisch nodules, LD, ADD                                                                                                                                                                                                                                      | spinal neurofibromas on T5-T6 and L4-L5 regions                                                                                                                                                                                                                                                                                                                                                                                                                                                                                           |
| UF-R1                                          | c.2540T>C  | p.Leu847Pro   | F              | 19-26 years | >5    | -        | large nodular neurofibroma on right thigh, surgically removed during the teenage years; some cutaneous (<10) and subcutaneous neurofibromas (#unknown)                         | scoliosis, chronic arthritis multiple joints, possible OPG (small lesion on optic nerve by MRI scan), Noonan phenotype features (PT, LSE, DPF), macrocephaly, non-ossifying fibroma on femur/knee, bilateral ankle clonus, knee hyperreflexia and esotropia | individual has suffered from proximal weakness in lower extremities that can be associated with the nerve root enlargements, significant difficulty walking, weakness of iliopsoas and quadriceps muscles; in addition, the individual has depigmented spots on back and left chest (vitiligo) and piebaldism (presence of white forelock); genetic analysis of <i>KIT</i> and <i>SNAI2</i> revealed presence of the <i>KIT</i> missense alteration c.1195G>A (p.Val399Ile), likely contributing to the piebaldism phenotype in this case |
| UAB-R0008                                      | c.2542G>A  | p.Gly848Arg   | RS             | 14-18 years | >5    | +        | -                                                                                                                                                                              | scoliosis, LD (dyslexia associated with working memory and phonological awareness issues), history of recurrent migraine headaches                                                                                                                          | p.Gly848Arg causing low level missplicing r.2410_2543del; father was diagnosed with a bilateral distal sensory neuropathy, his spinal MRI was normal                                                                                                                                                                                                                                                                                                                                                                                      |
| ROT-R95424                                     | c.2542G>C  | p.Gly848Arg   | F              | >26 years   | <6    | +        | 2-6 cutaneous and 2-6 subcutaneous neurofibromas                                                                                                                               | normal development, concentration problems, macrocephaly                                                                                                                                                                                                    | individual's mother has many small CALMs spots and some neurofibromas                                                                                                                                                                                                                                                                                                                                                                                                                                                                     |
| UAB-R1002                                      | c.2542G>C  | p.Gly848Arg   | F              | 19-26 years | >5    | +        | mediastinal mass on chest (internal) and large plexiform neurofibroma bilateral on both sides of neck; 1 cutaneous neurofibroma in the right ear filling the entire canal      | scoliosis, hypertension, renal artery stenosis, conductive hearing loss in the right ear, likely secondary to right ear being filled with a neurofibroma                                                                                                    | individual's brother, father and paternal uncle have NF1                                                                                                                                                                                                                                                                                                                                                                                                                                                                                  |
| UG-R923                                        | c.2542G>C  | p.Gly848Arg   | F              | 19-26 years | 0     | -        | plexiform neurofibromas on both sides of the neck                                                                                                                              | moderate scoliosis, LD, ADHD                                                                                                                                                                                                                                | clumsiness with impaired walking, moderate atrophy of the distal leg muscles; generalized nerve sheath tumors, presence of symmetric neurofibromas in all spinal nerves of the body following the peripheral course of the nerves; case reported by Pascual-Castroviejo et al. <sup>17</sup>                                                                                                                                                                                                                                              |
| UAB-R2492                                      | c.2543G>A  | p.Gly848Glu   | F              | >26 years   | >5    | -        | plexiform neurofibroma on right leg (visible from outside); 100-500 cutaneous/subcutaneous neurofibromas                                                                       | macrocephaly                                                                                                                                                                                                                                                | none                                                                                                                                                                                                                                                                                                                                                                                                                                                                                                                                      |

### SYMPTOMATIC SPINAL NEUROFIBROMAS

|               |           |             |    |           |    |   |                                                                                                                                       |                                                                                                                                     |                                                                                                                                                                                                                                                                                                                                   |
|---------------|-----------|-------------|----|-----------|----|---|---------------------------------------------------------------------------------------------------------------------------------------|-------------------------------------------------------------------------------------------------------------------------------------|-----------------------------------------------------------------------------------------------------------------------------------------------------------------------------------------------------------------------------------------------------------------------------------------------------------------------------------|
| UAB-R3237     | c.2543G>A | p.Gly848Glu | RS | >26 years | <6 | + | plexiform neurofibromas on head, neck, left and right leg (visible from outside, without hyperpigmentation); 1 cutaneous neurofibroma | asymptomatic OPG, Lisch nodules                                                                                                     | none                                                                                                                                                                                                                                                                                                                              |
| MAN-R95417G   | c.2543G>A | p.Gly848Glu | F  | >26 years | 0  | + | multiple cutaneous and subcutaneous neurofibromas developed from her teenage years                                                    | SS, macrocephaly, normal development, possible Noonan phenotype (specific facial features, but no details available)                | MRI: tumors present on nerve roots throughout the neuroaxis, particularly around the cauda equina, and a large retroperitoneal mass; repeated few years later MRI showed a very extensive burden of nerve sheath tumors, involving the large majority of spinal nerve roots; case reported by Burkitt-Wright et al. <sup>18</sup> |
| MAN-R95417G-C | c.2543G>A | p.Gly848Glu | F  | >26 years | 0  | - | -                                                                                                                                     | Lisch nodules, pectus carinatum, normal development, possible Noonan phenotype (specific facial features, but no details available) | MRI: a very extensive burden of nerve sheath tumors, including a particularly large lobulated lesion in the occipital/posterior neck region; case reported by Burkitt-Wright et al. <sup>18</sup>                                                                                                                                 |

### ASYMPTOMATIC SPINAL NEUROFIBROMAS

|              |           |             |    |             |    |   |                                                                                                                                                                                                                                                                                                                                       |                                                                                                       |                                                                                                                                                                                                                                                                      |
|--------------|-----------|-------------|----|-------------|----|---|---------------------------------------------------------------------------------------------------------------------------------------------------------------------------------------------------------------------------------------------------------------------------------------------------------------------------------------|-------------------------------------------------------------------------------------------------------|----------------------------------------------------------------------------------------------------------------------------------------------------------------------------------------------------------------------------------------------------------------------|
| UAB-R0147    | c.2534G>A | p.Cys845Tyr | RS | 19-26 years | >5 | + | innumerable solitary and plexiform neurofibromas on left arm, neck, trunk, left leg, right leg, abdomen (visible from outside, with hyperpigmentation); left arm extensive neurofibroma confirmed histopathologically as a focally cellular neurofibroma with degenerative atypia; 6-99 cutaneous and 6-99 subcutaneous neurofibromas | abnormal development, LD                                                                              | numerous subcentimeter subcutaneous scalp solitary T2 hyperintense nodules; likely small peripheral nerve sheath tumors?                                                                                                                                             |
| ROT-R21382   | c.2540T>C | p.Leu847Pro | F  | >26 years † | >5 | + | left nervus ischiadicus, surgically removed; >500 cutaneous and 6-99 subcutaneous neurofibromas                                                                                                                                                                                                                                       | pericarditis carcinomatosa, metastasized MPNST, superior vena cava syndrome (SVCS), dyspnea on effort | individual died of MPNST at age of 30 years; family history: affected mother and sister                                                                                                                                                                              |
| UG-R01-C1    | c.2540T>C | p.Leu847Pro | F  | 14-18 years | >5 | + | plexiform neurofibroma on trunk (visible from outside); 2-6 cutaneous neurofibromas                                                                                                                                                                                                                                                   | scoliosis, short stature, odontogenic fibroma lower jaw (removed at age of 11)                        | individual attends vocational training; muscular build; paravertebral plexiform neurofibroma at the site of scoliosis surgery                                                                                                                                        |
| MIL-R999/399 | c.2542G>C | p.Gly848Arg | F  | 19-26 years | <6 | - | 2-6 cutaneous and 2-6 subcutaneous neurofibromas                                                                                                                                                                                                                                                                                      | scoliosis, mitral insufficiency, Lisch nodules                                                        | none                                                                                                                                                                                                                                                                 |
| UG-R923-S    | c.2542G>C | p.Gly848Arg | F  | 14-18 years | <6 | - | several cutaneous neurofibromas, #unknown                                                                                                                                                                                                                                                                                             | symptomatic OPG, scoliosis, short stature, cerebellar cystic tumors, borderline mental level, LD      | <u>brain MRI</u> : glial cystic tumor of low degree of malignancy in the left cerebellar hemisphere; symmetrical spinal neurofibromas that affected all the spinal nerves; case reported by Pascual-Castroviejo et al. <sup>17</sup>                                 |
| UG-R923-M    | c.2542G>C | p.Gly848Arg | F  | >26 years   | <6 | - | several cutaneous-subcutaneous neurofibromas                                                                                                                                                                                                                                                                                          | -                                                                                                     | individual showed asymmetrical spinal neurofibromas in all the spinal nerves; her father died at 40 years of age of multiple hepatic neurofibromas, but reportedly had no cutaneous manifestations of NF1; case reported by Pascual-Castroviejo et al. <sup>17</sup> |
| SGR-REA      | c.2543G>A | p.Gly848Glu | F  | >26 years   | >5 | - | -                                                                                                                                                                                                                                                                                                                                     | mild pulmonic insufficiency, Lisch nodules                                                            | none                                                                                                                                                                                                                                                                 |

**PrS:** proven sporadic; **F:** familial; **RS:** reportedly sporadic; **NS:** not specified; **LD:** learning difficulties; **SD:** speech delay; **ADD:** attention deficit disorder; **ADHD:** attention deficit hyperactivity disorder; **OPG:** optic pathway glioma; **SVCS:** superior vena cava syndrome; **MPNST:** malignant peripheral nerve sheath tumor; **PT:** ptosis; **LSE:** low set ears; **DPF:** downslanting palpebral fissures

**Table S7.** Optic pathway gliomas in individuals carrying a missense mutation affecting one of five codons 844-848 in this study.

| Family ID                                | cDNA level | Protein level | Family history | Age           | CALMs | Freckles | Neurofibromas                                                                                                                                           | Others                                                                                                                                                                                                         | Comments                                                                                                                                                                                                                                                                                                                                                                                                                                                                                                                   |
|------------------------------------------|------------|---------------|----------------|---------------|-------|----------|---------------------------------------------------------------------------------------------------------------------------------------------------------|----------------------------------------------------------------------------------------------------------------------------------------------------------------------------------------------------------------|----------------------------------------------------------------------------------------------------------------------------------------------------------------------------------------------------------------------------------------------------------------------------------------------------------------------------------------------------------------------------------------------------------------------------------------------------------------------------------------------------------------------------|
| <b>SYMPTOMATIC OPTIC PATHWAY GLIOMAS</b> |            |               |                |               |       |          |                                                                                                                                                         |                                                                                                                                                                                                                |                                                                                                                                                                                                                                                                                                                                                                                                                                                                                                                            |
| UAB-R624                                 | c.2531T>G  | p.Leu844Arg   | PrS            | 14-18 years   | >5    | +        | plexiform neurofibroma on right cheek; cutaneous neurofibromas (#unknown)                                                                               | bowled long bones, pectus carinatum, pulmonic stenosis, aortic coarctation, Noonan-phenotype features (and presence of pathogenic <i>PTPN11</i> mutation), short stature, pilocytic astrocytoma, Lisch nodules | MRI: bulky optic nerves, especially on the right, and a solid expansive lesion in the suprasellar region involving the optic chiasm and deforming the third ventricle; at 7 years of age, the individual complained of visual loss and cranial MRI showed progression with signs of hydrocephalus; the tumor, a pilocytic astrocytoma, was partially resected at age of 8 years; no further therapy was administered and the individual experienced progressive visual loss; case reported by Bertola et al. <sup>14</sup> |
| PAD-R300                                 | c.2531T>C  | p.Leu844Pro   | RS             | 2-4 years     | >5    | +        | -                                                                                                                                                       | hypothalamic glioma, abnormal development, SD                                                                                                                                                                  | OPG involved optic nerves and chiasm                                                                                                                                                                                                                                                                                                                                                                                                                                                                                       |
| ROT-R02233                               | c.2537C>A  | p.Ala846Asp   | PrS            | 14-18 years   | >5    | +        | plexiform neurofibroma on head (visible from outside, without hyperpigmentation); 2-6 cutaneous neurofibromas                                           | normal development, executive function problems                                                                                                                                                                | none                                                                                                                                                                                                                                                                                                                                                                                                                                                                                                                       |
| UG-R665                                  | c.2537C>A  | p.Ala846Asp   | F              | 5-8 years     | >5    | +        | -                                                                                                                                                       | LD, ADHD, hemangioma left (2-3 cm)                                                                                                                                                                             | OPG involved optic nerves, especially on the left, and chiasm                                                                                                                                                                                                                                                                                                                                                                                                                                                              |
| UL-R83988968                             | c.2540T>G  | p.Leu847Arg   | RS             | 5-8 years     | >5    | -        | -                                                                                                                                                       | hypertension, Noonan-like features, macrocephaly, short stature, juvenile xanthogranulomas, LD, Lisch nodules                                                                                                  | OPG involved optic nerves; individual needed treatment for <b>pubertas precox</b> ; hyper nasal speech after adenoidectomy and tonsillectomy                                                                                                                                                                                                                                                                                                                                                                               |
| UAB-R3508                                | c.2540T>C  | p.Leu847Pro   | F              | 14-18 years   | >5    | +        | plexiform neurofibromas on neck, trunk and left arm (visible from outside, with hyperpigmentation); symptomatic spinal neurofibromas (unilateral C1-C3) | short stature, abnormal development, LD, ADD, ADHD                                                                                                                                                             | OPG involved optic nerves; individual treated with bevacizumab and chemotherapy for 9-10 months; OPG is no longer symptomatic                                                                                                                                                                                                                                                                                                                                                                                              |
| CAR-R8012M6                              | c.2540T>C  | p.Leu847Pro   | NS             | 5-8 years     | >5    | NS       | NS                                                                                                                                                      | individual attends special school (LD?)                                                                                                                                                                        | none                                                                                                                                                                                                                                                                                                                                                                                                                                                                                                                       |
| MAD-R3.793                               | c.2540T>C  | p.Leu847Pro   | RS             | 19-26 years   | >5    | +        | plexiform neurofibroma on left side of the face (visible from outside) and orbital neurofibroma resected                                                | scoliosis, sphenoid wing dysplasia, short stature, macrocephaly, LD, Lisch nodules                                                                                                                             | OPG involved left optic nerves and chiasm; hemimegalencephaly with parenchymal atrophy and complex partial seizures                                                                                                                                                                                                                                                                                                                                                                                                        |
| UG-R01-S1                                | c.2540T>C  | p.Leu847Pro   | F              | >26 years     | >5    | +        | -                                                                                                                                                       | short stature, focal epilepsy, psychiatric problems                                                                                                                                                            | -                                                                                                                                                                                                                                                                                                                                                                                                                                                                                                                          |
| UAB-R1474                                | c.2542G>A  | p.Gly848Arg   | RS             | 5-8 years     | >5    | +        | 2-6 intradermal neurofibromas                                                                                                                           | pectus carinatum, macrocephaly, embryonal rhabdomyosarcoma, abnormal development, gross motor delays, LD, ADHD, Lisch nodules                                                                                  | OPG involved optic nerves and chiasm; p.Gly848Arg causing low level missplicing r.2410_2543del                                                                                                                                                                                                                                                                                                                                                                                                                             |
| UG-R923-S                                | c.2542G>C  | p.Gly848Arg   | F              | 14-18 years   | <6    | -        | several cutaneous neurofibromas (#unknown); asymptomatic spinal neurofibromas affected all the spinal nerves                                            | scoliosis, short stature, cerebellar cystic tumors, LD                                                                                                                                                         | OPG involved left optic nerve and chiasm; MRI: glial cystic tumor with low degree of malignancy in the left cerebellar hemisphere                                                                                                                                                                                                                                                                                                                                                                                          |
| SGR-REA-S                                | c.2543G>A  | p.Gly848Glu   | F              | 19-26 years † | >5    | -        | plexiform neurofibroma on neck (visible from outside, without hyperpigmentation)                                                                        | short stature, MPNST                                                                                                                                                                                           | OPG involved optic chiasm                                                                                                                                                                                                                                                                                                                                                                                                                                                                                                  |

**PrS:** proven sporadic; **F:** familial; **RS:** reportedly sporadic; **LD:** learning difficulties; **SD:** speech delay; **ADD:** attention deficit disorder; **ADHD:** attention deficit hyperactivity disorder; **MPNST:** malignant peripheral nerve sheath tumor; **OPG:** optic pathway glioma; **NS:** not specified

| Family ID                                        | cDNA level | Protein level | Family history | Age         | CALMs | Freckles | Neurofibromas                                                                                                                                                          | Others                                                                                                                                                                        | Comments                                                                                                                        |
|--------------------------------------------------|------------|---------------|----------------|-------------|-------|----------|------------------------------------------------------------------------------------------------------------------------------------------------------------------------|-------------------------------------------------------------------------------------------------------------------------------------------------------------------------------|---------------------------------------------------------------------------------------------------------------------------------|
| <b><u>ASYMPTOMATIC OPTIC PATHWAY GLIOMAS</u></b> |            |               |                |             |       |          |                                                                                                                                                                        |                                                                                                                                                                               |                                                                                                                                 |
| UAB-R0903                                        | c.2530C>T  | p.Leu844Phe   | PrS            | 9-13 years  | >5    | +        | absent                                                                                                                                                                 | LD, special education                                                                                                                                                         | none                                                                                                                            |
| UAB-R0713                                        | c.2531T>G  | p.Leu844Arg   | RS             | 5-8 years   | >5    | +        | 2-6 cutaneous neurofibromas                                                                                                                                            | macrocephaly, abnormal development                                                                                                                                            | OPG involved optic nerves                                                                                                       |
| MIL-R168                                         | c.2531T>G  | p.Leu844Arg   | RS             | >26 years   | >5    | -        | 2-6 cutaneous and 2-6 subcutaneous neurofibromas                                                                                                                       | scoliosis, possible brainstem glioma, Lisch nodules                                                                                                                           | OPG involved optic nerves                                                                                                       |
| SGR-RSO                                          | c.2531T>G  | p.Leu844Arg   | RS             | 19-26 years | >5    | +        | absent                                                                                                                                                                 | scoliosis                                                                                                                                                                     | none                                                                                                                            |
| UAB-R3714                                        | c.2531T>C  | p.Leu844Pro   | PrS            | 0-24 months | >5    | +        | absent                                                                                                                                                                 | Lisch nodules                                                                                                                                                                 | none                                                                                                                            |
| UAB-R0252                                        | c.2540T>C  | p.Leu847Pro   | RS             | 19-26 years | >5    | +        | plexiform neurofibroma on trunk (with hyperpigmentation); 2-6 cutaneous, 2-6 subcutaneous and 2-6 intradermal neurofibromas                                            | -                                                                                                                                                                             | none                                                                                                                            |
| UAB-R2934                                        | c.2540T>C  | p.Leu847Pro   | F              | 19-26 years | >5    | +        | 2-6 cutaneous, 2-6 subcutaneous and 2-6 intradermal neurofibromas                                                                                                      | Lisch nodules                                                                                                                                                                 | bilateral OPG, no OPG treatment                                                                                                 |
| UAB-R4965                                        | c.2540T>C  | p.Leu847Pro   | F              | 14-18 years | >5    | +        | a few subcutaneous neurofibromas on lower back                                                                                                                         | Lisch nodules, bone cysts, LD, ADD, Asperger syndrome, anger problems, mild hearing loss, migraines, non-ossifying fibroma of the right knee and anger/impulse control issues | OPG involved optic nerves and chiasm; individual had a tethered cord repair and had complaints of chronic pain in various areas |
| UAB-R2546                                        | c.2540T>C  | p.Leu847Pro   | RS             | 14-18 years | >5    | +        | a few subcutaneous neurofibromas                                                                                                                                       | ADD, migraine headaches (very strong family history of migraines); unusual bone infarctions at the site of some probable non-ossifying fibromas                               | OPG involved left chiasm and has been present for many years; it has remained asymptomatic and unchanged in size                |
| UAB-R1928                                        | c.2540T>C  | p.Leu847Pro   | RS             | 19-26 years | >5    | +        | 6-99 cutaneous, 2-6 subcutaneous and 2-6 intradermal neurofibromas                                                                                                     | dural ectasia, 4 <sup>th</sup> lumbar vertebrae fragmentation, mild pervasive developmental delay, LD                                                                         | OPG involved optic nerves                                                                                                       |
| MAD-R3.7001                                      | c.2540T>C  | p.Leu847Pro   | RS             | 5-8 years   | >5    | +        | plexiform neurofibroma on head (visible from outside); 2-6 cutaneous neurofibromas                                                                                     | Lisch nodules, macrocephaly, LD                                                                                                                                               | OPG involved optic nerves                                                                                                       |
| MAD-R3.409                                       | c.2540T>C  | p.Leu847Pro   | RS             | 9-13 years  | >5    | +        | absent                                                                                                                                                                 | LD                                                                                                                                                                            | MRI: anomalous posterior fossa venous drainage; OPG involved left optic nerve                                                   |
| MIL-R361/018                                     | c.2540T>C  | p.Leu847Pro   | F              | 14-18 years | >5    | +        | absent                                                                                                                                                                 | abnormal development                                                                                                                                                          | OPG involved optic nerves, especially on the left; MRI: unidentified bright objects (UBOs)                                      |
| ROT-R89874                                       | c.2540T>C  | p.Leu847Pro   | F              | 9-13 years  | >5    | +        | absent                                                                                                                                                                 | abnormal development                                                                                                                                                          | none                                                                                                                            |
| UG-R004                                          | c.2540T>C  | p.Leu847Pro   | F              | 9-13 years  | >5    | +        | 2-6 subcutaneous neurofibromas                                                                                                                                         | ADD, ADHD, special education (LD?)                                                                                                                                            | OPG involved left optic nerve and chiasm; brother was diagnosed with ADHD, but no NF1                                           |
| UG-R01                                           | c.2540T>C  | p.Leu847Pro   | F              | >26 years   | >5    | +        | 2-6 cutaneous and 2-6 intradermal neurofibromas (symptomatic internal neurofibroma in left knee)                                                                       | Lisch nodules, bone cysts in femur                                                                                                                                            | OPG has remained asymptomatic for 16 years                                                                                      |
| UAB-R3513                                        | c.2542G>A  | p.Gly848Arg   | F              | 2-4 years   | >5    | +        | 2-6 cutaneous neurofibromas                                                                                                                                            | -                                                                                                                                                                             | individual's brother has developmental delay, but he does not have any NF pigmentary signs                                      |
| UAB-R3237                                        | c.2543G>A  | p.Gly848Glu   | RS             | >26 years   | <6    | +        | plexiform neurofibromas on head, neck, left and right leg (visible from outside, without hyperpigmentation); 1 cutaneous neurofibroma, symptomatic spinal neurofibroma | -                                                                                                                                                                             | OPG involved optic nerves                                                                                                       |

PrS: proven sporadic; F: familial; RS: reportedly sporadic; LD: learning difficulties; ADD: attention deficit disorder; ADHD: attention deficit hyperactivity disorder; OPG: optic pathway glioma

**Table S8.** Malignant neoplasms in individuals carrying a missense mutation affecting one of five codons 844-848 in this study.

| Family ID               | cDNA level | Protein level | Family history | Age           | CALMs | Freckles | Neurofibromas                                                                                                                                        | Others                                                                                                             | Comments                                                                                                                                                                                                                                                                                                                                                                                                  |
|-------------------------|------------|---------------|----------------|---------------|-------|----------|------------------------------------------------------------------------------------------------------------------------------------------------------|--------------------------------------------------------------------------------------------------------------------|-----------------------------------------------------------------------------------------------------------------------------------------------------------------------------------------------------------------------------------------------------------------------------------------------------------------------------------------------------------------------------------------------------------|
| <b>RHABDOMYOSARCOMA</b> |            |               |                |               |       |          |                                                                                                                                                      |                                                                                                                    |                                                                                                                                                                                                                                                                                                                                                                                                           |
| UAB-R1227               | c.2540T>C  | p.Leu847Pro   | RS             | 2-4 years     | >5    | +        | plexiform neurofibroma on back (visible from outside, with hyperpigmentation)                                                                        | normal development                                                                                                 | MRI: mass in left lobe of liver with possible involvement of the right atrium (diagnosis: embryonal rhabdomyosarcoma)                                                                                                                                                                                                                                                                                     |
| ROT-R49013              | c.2540T>C  | p.Leu847Pro   | RS             | >26 years     | >5    | NS       | -                                                                                                                                                    | scoliosis, macrocephaly                                                                                            | <b>embryonal rhabdomyosarcoma</b> of left testis at 2 years old and <b>astrocytoma grade II</b> at 15 years old                                                                                                                                                                                                                                                                                           |
| UAB-R1474               | c.2542G>A  | p.Gly848Arg   | RS             | 5-8 years     | >5    | +        | 2-6 intradermal neurofibromas                                                                                                                        | Lisch nodules, symptomatic OPG, pectus carinatum, macrocephaly, abnormal development, gross motor delays, LD, ADHD | diagnosis: embryonal rhabdomyosarcoma; p.Gly848Arg causing low level missplicing r.2410_2543del                                                                                                                                                                                                                                                                                                           |
| <b>MPNST</b>            |            |               |                |               |       |          |                                                                                                                                                      |                                                                                                                    |                                                                                                                                                                                                                                                                                                                                                                                                           |
| MAN-R48902G             | c.2530C>T  | p.Leu844Phe   | F              | >26 years     | >5    | +        | 6-99 cutaneous, 2-6 subcutaneous and 2-6 intradermal neurofibromas                                                                                   | hypertension                                                                                                       | low grade MPNST in right distal femur                                                                                                                                                                                                                                                                                                                                                                     |
| CAR-R18010M61           | c.2540T>C  | p.Leu847Pro   | F              | >26 years     | >5    | +        | 6-99 cutaneous neurofibromas                                                                                                                         | -                                                                                                                  | individual has two sisters with multiple neurofibromas and brother who had colorectal cancer in his 40s                                                                                                                                                                                                                                                                                                   |
| CAR-RNIS                | c.2540T>C  | p.Leu847Pro   | F              | >26 years     | <6    | -        | plexiform neurofibroma in pelvis; 100-500 cutaneous neurofibromas                                                                                    | -                                                                                                                  | <b>MPNST and breast cancer</b> ; genetic <i>BRC1/2</i> testing was negative by whole exome sequencing (WES); WES analysis revealed the presence of p.Leu847Pro in all the three tumors and independent somatic "second hits" in <i>NF1</i> as well as multiple copy number changes in the breast cancer and MPNST, but not in the plexiform neurofibroma; case reported by McPherson et al. <sup>16</sup> |
| ROT-R21382              | c.2540T>C  | p.Leu847Pro   | F              | >26 years †   | >5    | +        | left nervus ischiadicus, surgically removed; >500 cutaneous and 6-99 subcutaneous neurofibromas, asymptomatic spinal neurofibromas (from T11 and up) | pericarditis carcinomatosa, superior vena cava syndrome (SVCS) and dyspnea on effort                               | metastasized MPNST; <b>individual died of MPNST at age of 30 years</b>                                                                                                                                                                                                                                                                                                                                    |
| UG-R01-S2               | c.2540T>C  | p.Leu847Pro   | F              | 19-26 years † | >5    | +        | cutaneous and subcutaneous neurofibromas (#unknown); possible internal tumors                                                                        | -                                                                                                                  | malignant MPNST of mediastinum and abdomen; <b>individual died of MPNST at age of 25 years</b>                                                                                                                                                                                                                                                                                                            |
| UG-R01-S3               | c.2540T>C  | p.Leu847Pro   | F              | 19-26 years † | NS    | NS       | NS                                                                                                                                                   | NS                                                                                                                 | <b>individual died of MPNST at age of 20 years</b> ; individual was diagnosed with NF1, no further information available                                                                                                                                                                                                                                                                                  |
| SGR-REA-S               | c.2543G>A  | p.Gly848Glu   | F              | 19-26 years † | >5    | -        | plexiform neurofibroma on neck (visible from outside, without hyperpigmentation)                                                                     | symptomatic OPG, short stature                                                                                     | <b>individual died of MPNST at age of 26 years</b>                                                                                                                                                                                                                                                                                                                                                        |
| <b>OTHERS</b>           |            |               |                |               |       |          |                                                                                                                                                      |                                                                                                                    |                                                                                                                                                                                                                                                                                                                                                                                                           |
| UG-R01-M                | c.2540T>C  | p.Leu847Pro   | F              | >26 years †   | >5    | +        | cutaneous neurofibromas (#unknown); possible internal neurofibroma                                                                                   | Lisch nodules                                                                                                      | <b>individual died of metastasized colon cancer (adenocarcinoma) at age of 54 years</b>                                                                                                                                                                                                                                                                                                                   |
| MIL-R192/982-F          | c.2540T>C  | p.Leu847Pro   | F              | >26 years     | <6    | +        | plexiform neurofibroma on palate (without hyperpigmentation); 6-99 cutaneous and 2-6 subcutaneous neurofibromas                                      | Lisch nodules, scoliosis, severe mood depression                                                                   | <b>medullary thyroid carcinoma</b>                                                                                                                                                                                                                                                                                                                                                                        |
| UAB-R9493               | c.2542G>A  | p.Gly848Arg   | F              | 5-8 years     | <6    | -        | -                                                                                                                                                    | -                                                                                                                  | <b>NF1-associated JMML</b> (second hit identified: c.1246C>T, p.Arg416*)                                                                                                                                                                                                                                                                                                                                  |

F: familial; RS: reportedly sporadic; NS: not specified; LD: learning difficulties; ADHD: attention deficit hyperactivity disorder; OPG: optic pathway glioma; JMML: juvenile myelomonocytic leukemia



**Table S9.** Comparison of clinical features (malignant neoplasms, >5 CALMs, skinfold freckles, cutaneous and symptomatic spinal neurofibromas) in cohorts of individuals carrying different missense mutations affecting codons 844-848 - additional statistical calculations.

| NF1 clinical features                           | Number of individuals (%) |                               | p value (2-tailed Fisher's exact test) |
|-------------------------------------------------|---------------------------|-------------------------------|----------------------------------------|
|                                                 | p.Leu847Pro               | Other mutations in AA 844-848 |                                        |
| Malignant neoplasms $\geq$ 14 years             | 8/38 (21.1)               | 2/40 (5)                      | <b>0.0448</b>                          |
|                                                 | p.Gly848                  | Other mutations in AA 844-848 |                                        |
| Symptomatic spinal neurofibromas $\geq$ 9 years | 8/20 (40)                 | 4/59 (6.8)                    | <b>0.0012</b>                          |
| >5 CALMs                                        | 15/34 (44.1)              | 115/123 (93.5)                | <b>&lt;0.0001</b>                      |
| Skinfold freckles $\geq$ 9 years                | 11/23 (47.8)              | 65/72 (90.3)                  | <b>&lt;0.0001</b>                      |
| Cutaneous neurofibromas $\geq$ 19 years         | 5/18 (27.8)               | 42/51 (82.4)                  | <b>&lt;0.0001</b>                      |

**Table S10.** List of all adjusted p-values after applying the Benjamini-Hochberg correction for multiple testing with false discovery rates at 0.05 and 0.01.

| p-value | index | Statistical significance at p<0.05 |                    | Statistical significance at p<0.01 |                    |
|---------|-------|------------------------------------|--------------------|------------------------------------|--------------------|
|         |       | B-H critical <sup>A</sup>          | value <sup>B</sup> | B-H critical <sup>A</sup>          | value <sup>B</sup> |
| 0.8794  | 1     | 0.0250                             |                    | 0.0050                             |                    |
| 0.5830  | 2     | 0.0246                             |                    | 0.0049                             |                    |
| 0.5727  | 3     | 0.0242                             |                    | 0.0048                             |                    |
| 0.4489  | 4     | 0.0237                             |                    | 0.0047                             |                    |
| 0.4296  | 5     | 0.0233                             |                    | 0.0047                             |                    |
| 0.3590  | 6     | 0.0229                             |                    | 0.0046                             |                    |
| 0.2968  | 7     | 0.0225                             |                    | 0.0045                             |                    |
| 0.2916  | 8     | 0.0220                             |                    | 0.0044                             |                    |
| 0.1349  | 9     | 0.0216                             |                    | 0.0043                             |                    |
| 0.1323  | 10    | 0.0212                             |                    | 0.0042                             |                    |
| 0.1160  | 11    | 0.0208                             |                    | 0.0042                             |                    |
| 0.1029  | 12    | 0.0203                             |                    | 0.0041                             |                    |
| 0.0693  | 13    | 0.0199                             |                    | 0.0040                             |                    |
| 0.0619  | 14    | 0.0195                             |                    | 0.0039                             |                    |
| 0.0451  | 15    | 0.0191                             |                    | 0.0038                             |                    |
| 0.0409  | 16    | 0.0186                             |                    | 0.0037                             |                    |
| 0.0404  | 17    | 0.0182                             |                    | 0.0036                             |                    |
| 0.0384  | 18    | 0.0178                             |                    | 0.0036                             |                    |
| 0.0341  | 19    | 0.0174                             |                    | 0.0035                             |                    |
| 0.0276  | 20    | 0.0169                             |                    | 0.0034                             |                    |
| 0.0263  | 21    | 0.0165                             |                    | 0.0033                             |                    |
| 0.0241  | 22    | 0.0161                             |                    | 0.0032                             |                    |
| 0.0186  | 23    | 0.0157                             |                    | 0.0031                             |                    |
| 0.0174  | 24    | 0.0153                             |                    | 0.0031                             |                    |
| 0.0164  | 25    | 0.0148                             |                    | 0.0030                             |                    |
| 0.0125  | 26    | 0.0144                             | *                  | 0.0029                             |                    |
| 0.0080  | 27    | 0.0140                             | *                  | 0.0028                             |                    |
| 0.0076  | 28    | 0.0136                             | *                  | 0.0027                             |                    |
| 0.0067  | 29    | 0.0131                             | *                  | 0.0026                             |                    |
| 0.0061  | 30    | 0.0127                             | *                  | 0.0025                             |                    |
| 0.0060  | 31    | 0.0123                             | *                  | 0.0025                             |                    |
| 0.0043  | 32    | 0.0119                             | *                  | 0.0024                             |                    |
| 0.0042  | 33    | 0.0114                             | *                  | 0.0023                             |                    |
| 0.0028  | 34    | 0.0110                             | *                  | 0.0022                             |                    |
| 0.0025  | 35    | 0.0106                             | *                  | 0.0021                             |                    |
| 0.0023  | 36    | 0.0102                             | *                  | 0.0020                             |                    |
| 0.0022  | 37    | 0.0097                             | *                  | 0.0019                             |                    |
| 0.0020  | 38    | 0.0093                             | *                  | 0.0019                             |                    |
| 0.0012  | 39    | 0.0089                             | *                  | 0.0018                             | *                  |
| 0.0007  | 40    | 0.0085                             | *                  | 0.0017                             | *                  |
| 0.0005  | 41    | 0.0081                             | *                  | 0.0016                             | *                  |
| 0.0004  | 42    | 0.0076                             | *                  | 0.0015                             | *                  |
| 0.0002  | 43    | 0.0072                             | *                  | 0.0014                             | *                  |
| 0.0002  | 44    | 0.0068                             | *                  | 0.0014                             | *                  |
| 0.0001  | 45    | 0.0064                             | *                  | 0.0013                             | *                  |
| 0.0001  | 46    | 0.0059                             | *                  | 0.0012                             | *                  |
| 0.0001  | 47    | 0.0055                             | *                  | 0.0011                             | *                  |
| 0.0001  | 48    | 0.0051                             | *                  | 0.0010                             | *                  |
| 0.0001  | 49    | 0.0047                             | *                  | 0.0009                             | *                  |
| 0.0001  | 50    | 0.0042                             | *                  | 0.0008                             | *                  |
| 0.0001  | 51    | 0.0038                             | *                  | 0.0008                             | *                  |
| 0.0001  | 52    | 0.0034                             | *                  | 0.0007                             | *                  |
| 0.0001  | 53    | 0.0030                             | *                  | 0.0006                             | *                  |
| 0.0001  | 54    | 0.0025                             | *                  | 0.0005                             | *                  |
| 0.0001  | 55    | 0.0021                             | *                  | 0.0004                             | *                  |
| 0.0001  | 56    | 0.0017                             | *                  | 0.0003                             | *                  |
| 0.0001  | 57    | 0.0013                             | *                  | 0.0003                             | *                  |
| 0.0001  | 58    | 0.0008                             | *                  | 0.0002                             | *                  |
| 0.0001  | 59    | 0.0004                             | *                  | 0.0001                             | *                  |

<sup>A</sup> according to Thissen et al.<sup>26</sup>; <sup>B</sup> an asterisk (\*) indicates the statistically significant p-value after B-H correction

**Table S11.** A mosaic neurofibromatosis type-1 case (13.5-year-old girl presenting with >5 CALMs and skinfold freckling) with the *NFI* c.2540T>C (p.Leu847Pro) mutation found as the “second hit” in the cultured melanocytes from one CALM.

| Family ID                                                                              | Biopsy                      | Mutation                 |                                   |
|----------------------------------------------------------------------------------------|-----------------------------|--------------------------|-----------------------------------|
|                                                                                        |                             | “First hit” <sup>A</sup> | “Second hit”                      |
| UAB-R921FNES                                                                           | 1 <sup>st</sup> CALM biopsy |                          | <b>c.2540T&gt;C (p.Leu847Pro)</b> |
| * analysis performed on successfully cultured melanocytes from three biopsies of CALMs | 2 <sup>nd</sup> CALM biopsy | c.5547-1G>A              | absent                            |
|                                                                                        | 3 <sup>rd</sup> CALM biopsy |                          | c.1432A>G (p.Lys478Glu)           |

<sup>A</sup> mutation leads to out-of-frame skipping of exon 38 [29] during *NFI* mRNA splicing and out-of-frame skipping exons 38 and 39 [29 and 30] in a proportion of *NFI* mRNA transcripts; the c.5547-1G>A mutation was not found in the blood lymphocytes by next-generation sequencing (0/600 reads, 3 different amplicons)

## Supplemental References

1. Messiaen, L.M., Callens, T., Mortier, G., Beysen, D., Vandernroucke, I., Van Roy, N., Spelemen, F., Paepe, A.D. (2000). Exhaustive mutation analysis of the NF1 gene allows identification of 95% of mutations and reveals a high frequency of unusual splicing defects. *Hum. Mutat.* *15*, 541-555.
2. Messiaen, L.M., and Wimmer, K. (2012). Mutation analysis of the *NF1* gene by cDNA-based sequencing of the coding region. In *Advances in Neurofibromatosis Research*, K.S.G. Cunha and M. Geller, ed. (Nova Science Publishers, Inc.), pp. 89-108.
3. Richards, S., Aziz, N., Bale, S., Bick, D., Das, S., Gastier-Foster, J., Grody, W.W., Hedge, M., Lyon, E., Spector, E., et al. (2015). Standards and guidelines for the interpretation of sequence variants: a joint consensus recommendation of the American College of Medical Genetics and Genomics and the Association for Molecular Pathology. *Genet. Med.* *17*, 405-424.
4. Mattocks, C., Baralle, D., Tarpey, P., French-Constant, C., Bobrow, M., Whittaker, J. (2004). Automated comparative sequence analysis identifies mutations in 89% of NF1 patients and confirms a mutation cluster in exons 11-17 distinct from the GAP related domain. *J. Med. Genet.* *41*, e48.
5. van Minkelen, R., van Bever, Y., Kromosoeto, J.N., Withagen-Hermans, C.J., Nieuwlaat, A., Halley, D.J., van den Ouweland, A.M. (2014). A clinical and genetic overview of 18 years neurofibromatosis type 1 molecular diagnostics in the Netherlands. *Clin. Genet.* *85*, 318-327.
6. Sabbagh, A., Pasmant, E., Imbard, A., Luscan, A., Soares, M., Blanché, H., Laurendeau, I., Ferkal, S., Vidaud, M., Pinson, S. (2013). NF1 molecular characterization and neurofibromatosis type 1 genotype-phenotype correlation: the French experience. *Hum. Mutat.* *34*, 1510-1518.
7. Pasmant, E., Parfait, B., Luscan, A., Goussard, P., Briand-Suleau, A., Laurendeau, I., Fouveaut, C., Leroy, C., Montadert, A., Wolkenstein, P., et al. (2015). Neurofibromatosis type 1 molecular diagnosis: what can NGS do for you when you have a large gene with loss of function mutations? *Eur. J. Hum. Genet.* *23*, 596-601.
8. Maynard, J., Krawczak, M., Upadhyaya, M. (1997). Characterization and significance of nine novel mutations in exon 16 of the neurofibromatosis type 1 (NF1) gene. *Hum. Genet.* *99*, 674-676.
9. Kluwe, L., Tatagiba, M., Fünsterer, C., Mautner, V.F. (2003). NF1 mutations and clinical spectrum in patients with spinal neurofibromas. *J. Med. Genet.* *40*, 368-371.
10. Bongiorno, M.R., Cefalù, A.B., Aricò, M., Averna, M. (2008). Clinical, pathologic, and genetic features of massive soft tissue neurofibromas in a Sicilian patient. *Dermatol. Ther.* *3*, S21-S25.
11. Ars, E., Serra, E., Garcia, J., Kruyer, H., Gaona, A., Lázaro, C., Estivill X. (2000). Mutations affecting mRNA splicing are the most common molecular defects in patients with neurofibromatosis type 1. *Hum. Mol. Genet.* *9*, 237-247.
12. Ribeiro, M.J., Violante, I.R., Bernardino, I., Ramos, F., Saraiva, J., Reviriego, P., Upadhyaya, M., Silva, E.D., Castelo-Branco, M. (2012). Abnormal achromatic and chromatic contrast sensitivity in neurofibromatosis type 1. *Invest. Ophthalmol. Vis. Sci.* *53*, 287-293.
13. Zhou, X., Edmonson, M.N., Wilkinson, M.R., Patel, A., Wu, G., Liu, Y., Li, Y., Zhang, Z., Rusch, M.C., Parker, M., et al. (2016). Exploring genomic alteration in pediatric cancer using ProteinPaint. *Nat. Genet.* *48*, 4-6.

14. Bertola, D.R., Pereira, A.C., Passetti, F., de Oliveira, P.S., Messiaen, L., Gelb, B.D., Kim, C.A., Krieger, J.E. (2005). Neurofibromatosis-Noonan syndrome: molecular evidence of the concurrence of both disorders in a patient. *Am. J. Med. Genet. A.* *136A*, 242-245.
15. Cunha, K.S., Oliveira, N.S., Fausto, A.K., Cruz de Souza, C., Gros, A., Bandres, T., Idrissi, Y., Merlio, J-P., Soares de Moura Neto, R.S., Silva, R., et al. (2016). Hybridization capture-based next-generation sequencing to evaluate coding sequence and deep intronic mutations in the *NF1* gene. *Genes (Basel)* *7*, 133.
16. McPherson, J.R., Ong, C.K., Ng, C.C., Rajasegaran, V., Heng, H.L., Yu, W.S., Tan, B.K., Madhukumar, P., Teo, M.C., Ngeow, J. et al. (2015). Whole-exome sequencing of breast cancer, malignant peripheral nerve sheath tumor and neurofibroma from a patient with neurofibromatosis type 1. *Cancer Med.* *4*, 1871-1878.
17. Pascual-Castroviejo, I., Pascual-Pascual, S.I., Velazquez-Fragua, R., Botella, P., Viano, J. (2007). Familial spinal neurofibromatosis. *Neuropediatrics.* *38*, 105-108.
18. Burkitt Wright, E.M., Sach, E., Sharif, S., Quarrell, O., Carroll, T., Whitehouse, R.W., Upadhyaya, M., Huson, S.M., Evans, D.G.R. (2013). Can the diagnosis of NF1 be excluded clinically? A lack of pigmentary findings in families with spinal neurofibromatosis demonstrates a limitation of clinical diagnosis. *J. Med. Genet.* *50*, 606–613.
19. Girodon-Boulandet, E., Pantel, J., Cazeneuve, C., Gijn, M.V., Vidaud, D., Lemay, S., Martin, J., Zeller, J., Revuz, J., Goossens, M., et al. (2000). NF1 gene analysis focused on CpG-rich exons in a cohort of 93 patients with neurofibromatosis type 1. *Hum. Mutat.* *16*, 274-275.
20. Wang, Q., Montmain, G., Ruano, E., Upadhyaya, M., Dudley, S., Liskay, R.M., Thibodeau, S.N., Puisieux, A. (2003). Neurofibromatosis type 1 gene as a mutational target in a mismatch repair-deficient cell type. *Hum. Genet.* *112*, 117-123.
21. Fahsold, R., Hoffmeyer, S., Mischung, C., Gille, C., Ehlers, C., Kücükcayan, N., Abdel-Nour, M., Gewies, A., Peters, H., Kaufmann, D., et al. (2000). Minor lesion mutational spectrum of the entire NF1 gene does not explain its high mutability but points to a functional domain upstream of the GAP-related domain. *Am. J. Hum. Genet.* *66*, 790-818.
22. De Luca, A., Buccino, A., Gianni, D., Mangino, M., Giustini, S., Richetta, A., Divona, L., Calvieri, S., Mingarelli, R., Dallapiccola, B. (2003). NF1 gene analysis based on DHPLC. *Hum. Mutat.* *21*, 171-172.
23. De Luca, A., Schirinzi, A., Buccino, A., Bottillo, I., Sinibaldi, L., Torrente, I., Ciavarella, A., Dottorini, T., Porciello, R., Giustini, S., et al. (2004). Novel and recurrent mutations in the NF1 gene in Italian patients with neurofibromatosis type 1. *Hum. Mutat.* *23*, 629.
24. Li, K., Turner, A.N., Chen, M., Brosius, S.N., Schoeb, T.R., Messiaen, L.M., Bedwell, D.M., Zinn, K.R., Anastasaki, C., Gutmann, D.H., et al. (2016). Mice with missense and nonsense NF1 mutations display divergent phenotypes compared with human neurofibromatosis type 1. *Dis. Model. Mech.* *9*, 759-767.
25. Toonen, J.A., Anastasaki, C., Smithson, L.J., Gianino, S.M., Li, K., Kesterson, R.A., Gutmann, D.H. (2016). NF1 germline mutation differentially dictates optic glioma formation and growth in neurofibromatosis-1. *Hum. Mol. Genet.* *25*, 1703-1713.
26. Thissen, D., Steinberg, L., Kuang, D. (2002). Quick and easy implementation of the Benjamini-Hochberg procedure for controlling the false positive rate in multiple comparisons. *J. Educ. Behav. Stat.* *27*, 77-83.
